# Supplementary material
Source: publisher figshare collection journal article supplement (https://acs.figshare.com/ndownloader/files/21905562)
Supplement: Supplementary file 1 [file 21905562]

## Sheet: Set 1
Table S4. ABS screening reconfirmation data
Synonyms	SMILES	CDD P. falciparum Luciferase Dd2 Asexual Blood Stage (96hr) (n=1; 5μM): Luminescence inhibition (%)	CDD P. falciparum Luciferase Dd2 Single Point Reconfirmation (96hr) (n=3; 1.25μM): Luminescence inhibition (%)	CDD P. falciparum Luciferase Dd2 Single Point Reconfirmation (96hr) (n=3; 1.25μM): Standard deviation (±)	CDD P. falciparum Luciferase ABS 8-pt Reconfirmation Dose Response (96hr): IC50 (μM)	CDD P. falciparum Luciferase ABS 8-pt Reconfirmation Dose Response (96hr): Maximum inhibition (%)	CDD P. falciparum Luciferase ABS 11-pt Reconfirmation Dose Response (48hr): IC50 (μM)	CDD P. falciparum Luciferase ABS 11-pt Reconfirmation Dose Response (48hr): Maximum inhibition (%)	CDD P. falciparum Luciferase ABS 11-pt Reconfirmation Dose Response (96hr): IC50 (μM)	CDD P. falciparum Luciferase ABS 11-pt Reconfirmation Dose Response (96hr): Maximum inhibition (%)	CDD P. falciparum Sybr Green I ABS 11-pt Reconfirmation Dose Response (96hr): IC50 (μM)	CDD P. falciparum Sybr Green I ABS 11-pt Reconfirmation Dose Response (96hr): Maximum inhibition (%)
DDD01235864	C1CCCN(CC1)c1nccc(n1)-c1c[nH]nc1-c1ccncc1	78	94.3	0.360555	0.00697	93.5	> 4.16	62.2	0.0308	93.5	0.00564	78.8
DDD01025389	NC(=O)c1cccc2nc([nH]c12)[C@H]1CCN(Cc2ccccn2)C1	95.1	95.0333	1.18462	0.0339	98.4	0.058	94.1	0.0101	101	0.0807	86.6
DDD01235828	C1CCN(C1)c1nccc(n1)-c1c[nH]nc1-c1ccncc1	81.1	93.1667	0.51316	0.0618	91	> 4.16	53.9	0.167	92	0.037	79.4
DDD01056796	Cc1cccc(C)c1Nc1noc2CCN(Cc12)C(=O)c1ccnn1C	81.7	91.4	3.05123	0.14	96.7	0.425	98.3	0.328	101	0.266	96.3
DDD01065539	Cc1cc(C)c(CNCC(O)c2ccc(F)c(F)c2)c(C)c1	93	96.0667	0.550757	0.145	96.6	0.316	97.4	0.143	100	0.312	99.5
DDD01254485	Nc1nc2CNCCc2c(n1)N1CCCC(C1)c1nnc2ccccn12	84.8	95.7667	0.757188	0.181	90.3	> 12.5	46.1	0.312	95.2	> 12.5	52.8
DDD01034473	COc1ccc(cc1)N1CCCC2(CN(CCO2)c2nncs2)C1	88	94.7667	1.13725	0.195	95	0.758	88.1	0.451	97.9	0.83	95.3
DDD01058697	CN1C(=CC(=NS1(=O)=O)c1cn(C)nc1C)C(=O)Nc1ccc(Br)cc1	90	96.7	0.43589	0.196	95.2	0.55	99.4	0.281	101	0.321	99.9
DDD01061024	Cc1ccc(cc1)-c1ccc(nc1)C1CNCCO1	83.5	96.2333	0.251661	0.196	92	0.533	99.6	0.574	99.5	0.344	98.9
DDD01298957	Cc1cc(C)n(n1)C1CN(CC(O)c2cc(F)ccc2F)C1	84.7	95.5333	0.351188	0.207	94.9	1.46	98.6	0.854	100	0.733	98.5
DDD01067446	Clc1ccc(cc1)C1(CNC2=NCCN2)CCCCC1	90.2	90.2	1.75784	0.215	96.3	2.9	97.1	0.731	99.6	1.29	99.8
DDD01079497	O=C(CN1CCCC(C1)c1ccn[nH]1)Nc1nc2CCCc2s1	89.2	88.5	4.29302	0.222	90.5	0.618	83.6	0.451	97.6	0.192	73.2
DDD01056797	Cc1cccc(C)c1Nc1noc2CCN(Cc12)C(=O)c1cn(C)cn1	88.3	90.1667	4.04145	0.226	95.7	0.494	99.4	0.535	101	0.22	97.2
DDD01083756	CN1CCN(CC1)[C@H]1COC[C@@H]2CN(Cc3cc(C)cc(C)c3)C[C@H]12	94.1	91.3	1.90788	0.228	93.8	2.44	79.9	0.791	97.2	1.08	94.9
DDD01057307	CC(C)Nc1cc(ccn1)-c1c[nH]nc1C1CCN(C1)C(=O)C1CCC1	83.7	79.3667	5.42433	0.231	94.3	4.05	83	1.42	95.8	7.49	72
DDD01079901	CN1CCN(CC(NCc2cccc(C)c2)c2ccccc2)CC1	83.5	92.6333	0.152753	0.242	91.5	2.73	89.2	0.53	99	0.449	98.3
DDD01031590	Cc1ccc(CN2CCC3(CCN(Cc4ccoc4)CC3)CC2)cc1	92.7	92.1333	0.305505	0.242	94.3	2.04	86.7	0.444	99.4	2.33	91.6
DDD01057099	NC1CCc2nc(nc(Nc3ccc(F)cc3)c2C1)-c1cccnc1	87.1	94.7667	1.16762	0.243	96.1	3.56	98.4	0.99	100	1.31	100
DDD01058767	COc1ccc(C)cc1CN1CCC(CC1)c1cc2ncccc2cn1	78.2	96.2333	0.305505	0.246	96.3	0.0507	98.5	0.0439	100	0.136	101
DDD01251840	Cc1nccn1CCCN1CCCC(C1)c1ccccc1	77.8	92.6667	0.85049	0.247	91.7	3.3	83.3	0.14	99.5	0.88	93.4
DDD01059041	Cc1ncc(CN2CCN(CC3(CC3)c3ccc(C)cc3)CC2)n1C	95.4	89.4667	0.64291	0.25	94.8	1.95	77.8	0.532	96.3	1.32	88.5
DDD01067443	Clc1ccc(cc1)C1(CNC2=NCCN2)CCCC1	83.7	85.4667	5.14814	0.253	94.9	5.56	90	0.995	98.3	2.26	98.5
DDD01252518	C1CC(CN(C1)c1ncnc2CNCCc12)c1nnc2ccccn12	76.2	92.9667	1.0504	0.256	90.8	> 1.39	64.8	0.449	97.6	> 12.5	42
DDD01057030	Cc1cccc(C)c1Nc1noc2CCN(Cc12)C(=O)c1ccn(C)n1	86.6	91.8333	2.63122	0.26	96.3	0.885	97.1	0.693	99.6	0.913	95.5
DDD01079898	CN1CCN(CC(NCc2ccc(C)cc2)c2ccccc2)CC1	79.5	90.9667	0.378594	0.261	91.3	4.31	88.2	1.21	98.8	1.36	95.9
DDD01074928	CN(C1CCN(C)CC1)c1ccccc1CNCc1ccco1	85.9	93.5	2.3388	0.268	92.9	1.71	80.4	0.211	97.1	1.1	94.3
DDD01257764	Clc1ccccc1C1(CCNCC1)c1ccnc(CC2CC2)n1	87.8	92.1667	0.11547	0.271	92.2	3.74	90.6	0.581	98	0.422	70.6
DDD01064155	Clc1cccc(c1)C(NCc1ncc[nH]1)c1ccccn1	86.9	94.3	1.249	0.272	94.2	1.99	94.1	0.408	98.7	3.75	88.1
DDD01079504	Cc1cc(n[nH]1)C1CCCN(CC(=O)Nc2nc3CCCc3s2)C1	86.9	78.7	8.44808	0.276	81.5	0.456	84.9	0.388	97.8	0.179	71.3
DDD01057306	CC(C)CNc1cc(ccn1)-c1c[nH]nc1C1CCN(C1)C(=O)C1CC1	84.6	74.5667	5.50757	0.277	95.6	5.71	85.8	1.93	96.6	5.02	50.9
DDD01079490	O=C(CN1CCCC(C1)c1ccn[nH]1)Nc1nc2CCCCc2s1	86.1	42.9	76.646	0.284	89.3	0.452	82.4	0.266	97	0.81	69.6
DDD01037968	CC(O)c1cccc(Nc2nc(NCCO)c3ccccc3n2)c1	89.4	87.9	1.47986	0.286	92.4	2.9	96.3	0.739	99.6	3.13	95.8
DDD01057305	CC(C)Nc1cc(ccn1)-c1c[nH]nc1C1CCN(C1)C(=O)C1CC1	80.9	77.1	2.2	0.292	95.7	5.35	85.8	1.73	98.4	8.07	76.9
DDD01068868	O=C(Nc1nccs1)C1CCCN1Cc1ccccn1	93.7	91.2667	1.02144	0.3	92.9	0.884	91.2	0.303	99.3	0.888	96.4
DDD01060979	CC1(C)CC(CC(C)(C)N1)N(Cc1cccnc1)Cc1cccc(F)c1	76.6	82.5667	1.28582	0.301	88	3.32	76.9	> 1.39	98.4	8.55	79.9
DDD01257938	Clc1ccccc1C1(CCNCC1)c1ccnc(n1)-c1ccncc1	83.6	92.5	0.264575	0.308	93.5	4.26	98.2	0.482	99.5	2.22	98.9
DDD01057089	CCCNc1cc(ccn1)-c1c[nH]nc1C1CCN(C1)C(=O)C1CCC1	92.5	69.8667	13.0001	0.31	96.1	4.01	86.1	1.63	97.9	1.34	61.5
DDD01250700	Cc1cc2nc([nH]c2cc1C)-c1cn(nn1)C1CCNCC1	87.4	96.6	1.41774	0.339	95.8	2.08	61.5	1.01	98.7	3.23	82
DDD01058696	CN1C(=CC(=NS1(=O)=O)c1cn(C)nc1C)C(=O)Nc1ccc(Cl)cc1	83.4	95.6333	0.750555	0.339	96.1	1.23	100	0.511	101	0.705	98.7
DDD01038630	Cc1cccc(NC(=O)c2cccc(OCc3nnnn3C)c2)n1	80.7	96.7	0.7	0.34	94.9	0.916	99.2	> 0.462	99.5	2.54	99.2
DDD01063807	CN(CC1CCN(CCO)CC1)Cc1cc(Cl)cc2cccnc12	88.7	98.1333	0.493288	0.355	94.1	2.2	97.5	1.42	100	0.584	95.8
DDD01057378	Fc1cccc(F)c1Cn1c(cc2cccnc12)C1CCNCC1	80.6	87.4333	1.15902	0.361	91.4	1.51	76	0.733	92.1	0.57	68.3
DDD01252936	Cc1ccc(C)c(OCCNC(=O)[C@@H]2CCCCN2)c1	79.4	79.1667	2.51064	0.366	89.3	6.36	74.3	1.17	87.5	7.6	80
DDD01253692	CN(C)C[C@@H]1CN(C[C@@H]1CO)C1CCN(CC1)c1ccc(F)cc1C	92.6	82.5	2.5	0.368	94.9	> 4.16	55.2	0.396	100	2.03	90.3
DDD01063654	Cc1ccc(CN(C2CC2)c2cc(C)nc3nc(nn23)C(F)(F)F)cc1	94	97.2	0.52915	0.372	93.8	2.34	89.4	0.45	99.7	2.1	92.9
DDD01079897	COc1cccc(CNC(CN2CCN(C)CC2)c2ccccc2)c1	82	89.6	1.92873	0.376	91	2.58	83.2	0.79	98.1	1.65	94.5
DDD01298775	CC(C)c1n[nH]c(C(=O)Nc2cc(C)ccn2)c1Br	73.7	93.4667	1.25831	0.39	91.3	3.6	93	1.39	97	8.74	51.2
DDD01034117	CCN1CCC2(CC1)CC(NCc1cccs1)c1ccccc1O2	85.8	85.7	0.69282	0.392	91.4	2.44	72.4	0.515	91.9	3.4	78.6
DDD01243670	CN(CCO)C[C@@H]1CN(C[C@@H]1CO)C1CCN(CC1)c1ccccc1Cl	79.5	71.8667	2.75379	0.398	94.9	0.887	96.9	0.653	99.6	1.34	86.9
DDD01252361	NCC1CCN(C1)C1CCN(CC1)c1ccc(cc1)-c1ccco1	91	97.3667	0.152753	0.4	95.9	3	98.8	1.8	100	0.605	95.1
DDD01085014	CC(C)N(C)Cc1cnc2CN(CCn12)C(=O)NC1CCCC1	83.4	96.1	0.793725	0.4	87.1	> 12.5	50.3	0.478	91	3.09	52.8
DDD01057236	Fc1ccccc1Cn1c(cc2cccnc12)C1CCNCC1	88.7	84.0333	1.15036	0.405	92.4	3.02	64.7	1.41	89.3	7.03	70.6
DDD01061881	CC(NCc1ccc(C)o1)c1cc(F)ccc1N1CCN(C)CC1	83.7	89	1.6	0.408	90.7	3.93	87.5	2.12	97.7	2.42	83.7
DDD01058752	Fc1ccc(F)c(CN2CCC(CC2)c2cc3ncccc3cn2)c1	76	95.8	0.264575	0.409	96.2	1.07	94.1	0.979	98	0.859	90.5
DDD01082017	Cc1ccc(CNC2CC3(CCN(CCO)CC3)c3ccccc23)s1	85.4	88.0667	1.59478	0.411	91	3.82	80.4	1.07	98	2.9	89.2
DDD01246711	Cc1ccc2[nH]c(nc2c1C)-c1cn(nn1)C1CCNCC1	85.4	94.8	1.85203	0.425	94.9	2.21	79.2	2.07	99.2	4.36	79.6
DDD01247848	COc1cccc(CN(C)Cc2[nH]c3ccccc3c2C)c1O	88.7	89.0667	5.98777	0.435	94.4	1.95	95.9	0.908	98.6	1.05	98
DDD01064153	Fc1cccc(c1)C(NCc1ncc[nH]1)c1ccccn1	91.8	83.1667	2.04042	0.446	91.1	5.61	86.1	0.644	97.4	5.58	82.6
DDD01257477	CC(C)N1CCC(CC1)NCc1cccnc1N(C)Cc1ccccc1	84.1	81.5	2.47588	0.45	89.2	> 12.5	61.1	3.84	87.8	0.163	83.8
DDD01257937	OCC1CCCCN1c1ccc(cn1)-c1nc(no1)-c1ccccc1F	75.5	88.4333	1.12398	0.46	90.5	1.36	83.7	1.23	89.1	> 12.5	41.3
DDD01073716	CC(NCC1CCN(CCO)CC1)c1ccc(OC(F)(F)F)cc1	93.8	92.6667	2.21886	0.461	95.5	3.68	93.5	0.546	99.2	2.88	95.9
DDD01060778	Clc1ccc(cc1)-c1ccc(nc1)C1CNCCO1	85.9	92.1667	0.90185	0.461	93	1.38	97.5	1.36	99.3	> 12.5	56.1
DDD01250556	CCCn1ccnc1CN1CCCC1c1ccccn1	86.8	68.0667	3.01054	0.461	87.7	4.66	53.8	1.47	94.8	11.9	68.5
DDD01246872	CN[C@@H](C)C(=O)N(Cc1cccc(C)c1)Cc1ccccc1OC	83.6	84.0667	1.48436	0.47	85.5	1.7	61.6	0.75	89.6	1.07	62.7
DDD01068941	CCNc1ccnc(CN2CCCC2C(=O)Nc2nccs2)c1	95.1	89.8667	2.82902	0.482	94.3	0.73	92.3	0.407	99.6	1.65	95.9
DDD01027600	COc1ccc(NC(=O)Cn2nc(C)c(C(C)=O)c2C)cc1	89.7	85.1667	3.09246	0.487	92.8	1.9	87	1.45	92.8	4.58	88.8
DDD01245610	Clc1ccccc1C1(CCNCC1)c1ccnc(n1)C1CCCC1	83	83.2	1.65227	0.493	87.3	4.17	92.8	0.755	98.9	3.55	76.4
DDD01027603	Cc1cc(C)c(N(CC(O)CNCc2ccccc2)S(C)(=O)=O)c(C)c1	70.4	88.2667	1.06927	0.508	90.1	2.17	75	0.829	90.9	4.91	81.7
DDD01058742	Cc1ncc(CN(Cc2ccccn2)Cc2ccccc2Cl)n1C	91.6	77	0.360555	0.51	86.1	3.44	74	0.999	94.5	1.54	67.5
DDD01079597	CN(C)C1CCN(CCNc2ncc(Br)cc2C)CC1	89.1	61.8333	35.797	0.51	92.4	7.01	87.3	1.15	99.5	3.19	92.7
DDD01243664	CN(Cc1ccsc1)c1nc(nc2CCNCCc12)-c1ccccn1	79.5	91.5667	1.88768	0.518	95.1	0.752	89.8	0.299	98.7	0.872	78.7
DDD01056673	CN[C@@H]1CCC[C@@H](Oc2ccccc2Oc2ccc(C)cc2)[C@@H]1O	90.3	85.1333	1.19304	0.518	96	1.83	97	0.625	99.7	2.33	99.2
DDD01073719	CC(NCC1CCN(CCO)CC1)c1ccc(cc1)C(F)(F)F	89.1	84.5667	2.06478	0.521	92.5	4.64	89.6	0.614	98.9	2.65	92.8
DDD01298780	CC(C)c1n[nH]c(C(=O)Nc2ccccn2)c1Br	84.6	90.6667	1.84752	0.532	92.3	4.01	87.6	3.99	95.1	4.27	51.4
DDD01072406	OCCN1CCC(CNCC2=CC=C(Br)C=C2)CC1	86.7	78.6	1.63707	0.532	95.5	2.84	94.9	0.749	99.6	2.01	92.7
DDD01062085	Cc1cnn(CCNCc2nccn2Cc2ccccc2)c1	83	66.1667	4.30155	0.534	83.3	10.4	75	1.22	95.2	> 12.5	51.3
DDD01254676	Cc1ccccc1N1CCCN(CC2(O)CCCNC2)CC1	87.7	88.5667	1.62891	0.538	90.4	3.64	89.1	1.37	97.2	1.59	91.2
DDD01064880	CNC(=O)CCN(C)CC1(CC1)c1ccc(Br)cc1	87.3	76.1333	3.15647	0.539	87.5	5.21	64.4	4.63	88.9	6.59	73.3
DDD01059044	CN(C)CCN(C)C(=O)Cn1cccc2cc(nc12)-c1ccc(F)cc1	86.8	94.5333	0.57735	0.543	95.7	1.87	95.1	1.9	98.3	1.17	99.6
DDD01059749	Cc1ccc(Oc2cc(F)ccc2O[C@@H]2CCC[C@@H](N)[C@H]2O)cc1	91.1	78.9	1.57162	0.544	92.7	2.7	98	> 1.39	100	2.27	95.9
DDD01067441	ClC1=CC=C(C=C1)C1(CNC2=NCCN2)CC1	83.2	87.1667	3.95137	0.545	95.1	1.96	96.7	0.613	99.9	0.76	101
DDD01250278	O=C(N1CCOC(CCc2ccccc2)C1)c1scc2OCCOc12	88.7	93.6333	1.77858	0.546	93.1	1.39	97.2	0.767	100	1.47	101
DDD01245918	NCC1Cc2cc(cc(Cl)c2O1)-c1nccc(n1)N1CCC(O)CC1	80.6	95.6667	0.750555	0.548	92	2.64	75.2	1.96	96.7	4.21	83.9
DDD01245231	CCN(Cc1c(F)cccc1Cl)c1cc(nc(C)n1)C1CCNCC1	76.4	77.5	1.75784	0.549	91.3	0.763	99.4	0.504	99.8	2.5	81.1
DDD01066238	CC1(C)CN(CCO1)C(CNC1=NCCN1)C1=CC=C(Cl)C=C1	83	75.8	3.45109	0.549	80.3	0.786	64.5	3.52	81.2	3.75	50.5
DDD01060996	CN(C)CCCN(Cc1sccc1C)Cc1ccccn1	77.9	70.7333	4.16213	0.549	79.6	> 12.5	51.6	3.57	82.3	> 12.5	46.2
DDD00408586	COC1=C2OCOC2=CC(CNCC(O)C2=CC(F)=C(F)C=C2)=C1	78.2	79.9667	1.72143	0.553	90.7	2.05	96.5	1.22	99.5	1.89	97.2
DDD01029240	NCC1[C@@H]2CN(Cc3cccc(Cl)c3)C[C@H]12	83.8	76.6667	0.404145	0.553	93.8	2.68	85	1.2	99	1.89	90.7
DDD01038250	COc1cccc(CNCc2ccc(F)c(Cl)c2)c1O	80	76.0333	2.55016	0.556	93.8	3.18	93.8	1.4	99.2	1.97	98.2
DDD01073393	COC1=C(OC)C(CNC2=NC(=NC(C)=C2)C2=CC=NC=C2)=CC=C1	89.3	86.4	4.04475	0.561	94.5	4.09	80	0.0383	98.2	0.589	75.8
DDD01077478	CC(C)C(CNCc1cccc2OCOc12)N1CCOCC1	76	84.8333	1.2897	0.563	86.4	> 12.5	52.1	2.57	85.2	1.89	62.1
DDD01073717	CC(NCC1CCN(CCO)CC1)C1=CC(Cl)=CC=C1	84.8	88.5	0.953939	0.564	94.9	3.01	93.9	0.988	99.8	1.32	92.1
DDD01056726	CCC(C)(C)n1nnnc1C(N1CCc2ccccc2C1)c1cccs1	73.9	66.3333	6.16468	0.564	91.1	3.18	71.7	0.803	93.7	4.96	79.3
DDD01035187	COC1=CC=C(C=C1OC)C1=C2NN=C(C#N)C(=N)N2N=C1C	87.8	97.2	0.264575	0.567	93	1.18	95.8	0.841	98.5	5.98	90.8
DDD01252927	CN(CCO)C[C@@H]1CN(Cc2ccccc2-c2ccccc2)C[C@@H]1CO	87.6	79.4667	1.89033	0.567	92	8.14	71.8	1.25	92.8	> 1.39	89.1
DDD01077309	CN1CCN(c2cnccc12)S(=O)(=O)c1ccc(Cl)c(Cl)c1	89.6	86.9	5.08626	0.572	92.2	6.77	78.7	1.46	95.5	5.69	82.8
DDD01067440	C(NC1=NCCN1)C1(CCCC1)C1=CC2=C(OCCO2)C=C1	81.1	78.3333	8.8636	0.572	86.8	8.77	68.7	1.63	92	1.24	65.6
DDD01075119	Cc1ccc(CNCc2cccc3cccnc23)c(OC2CCOC2)c1	85.4	69.9	4.84458	0.573	83.2	3.77	87.5	1.44	98.4	> 4.16	64.7
DDD01304823	CC(C)C1=NN(C)C(Cl)=C1CNCC(O)C1=CC(F)=CC=C1	82.4	76.2333	2.22336	0.575	92.1	3.48	89.6	1.39	98.7	3.66	92.5
DDD01069631	CN1CCN(CC(NCc2ccc(F)c(F)c2)c2ccccc2)CC1	83.8	74.0667	4.40606	0.575	89.5	5.37	78.3	0.913	94.6	4.41	85.4
DDD01067562	CCN1CCCN(CC1)S(=O)(=O)c1cc2ccccc2o1	84.3	80.5667	1.40475	0.578	87.2	8.55	65	1.34	85.4	1.46	73.1
DDD01063208	CN1CCC(CC1)N(Cc1ccco1)S(=O)(=O)c1ccc(Br)cc1Cl	74.7	73.1667	2.40069	0.579	76.6	> 12.5	21.3	2.19	81.7	10.6	54.5
DDD01038216	CCN(CC)CCNS(=O)(=O)c1cccc(CSC)c1	83.4	62.8667	4.48144	0.579	87.3	10.2	58.8	2.99	89.5	7.55	73.7
DDD01304344	CC(O)CN1CCC(CNCC2=CC(Br)=CC=C2)CC1	87.8	72.5	3.995	0.581	91.2	3.63	92.1	1.64	98.2	2.06	93.8
DDD01254054	NCC1Cc2cc(cc(F)c2O1)-c1nccc(n1)N1CCC(O)CC1	83.1	94.3333	0.11547	0.585	94.6	2.43	91.4	1.87	98.9	2.49	92
DDD01250141	Cc1cccc2[nH]c(nc12)-c1cn(nn1)C1CCNCC1	73.3	85.8667	1.43643	0.586	94.4	3.07	66.5	2.16	97.2	1.48	72.3
DDD01252975	CN(C)c1nc2CCCCc2c(NCc2cc(O)ncn2)n1	89.4	62.6	6.3	0.586	94	3.75	96	2.11	99.7	1.82	99.1
DDD01025345	COc1ccc2[nH]c(C[C@@H]3C[C@@H](C(C)C)[C@H](CN(C)C)C=C3C)nc2c1	78.9	69.9667	3.12623	0.587	88.6	12	66.8	1.53	91.5	3.63	67.2
DDD01058741	Cn1ccnc1CN(Cc1ccccn1)Cc1ccccc1Cl	79.4	73.5667	3.96779	0.591	93.9	2.68	94.3	0.592	100	6.14	83.5
DDD01074938	CN(C1CCN(C)CC1)c1ccccc1CNCc1c(C)noc1C	73.6	69.4667	14.008	0.592	91.9	> 12.5	61.9	1.55	86.7	2.6	85.6
DDD01077733	Cc1n[nH]cc1CNC1(CCCC1)c1ccc(F)cc1	83.4	67.4667	8.20081	0.593	86.6	> 12.5	59	2.1	87	> 1.39	59
DDD01057437	Nc1cc(ccn1)-c1c[nH]nc1C1CCCN1CCCc1ccccc1	77.3	86.8333	1.5308	0.594	96.2	3.06	63	0.669	100	2.26	96.1
DDD01252745	CCOc1cccc(CN2CCCC(C2)Nc2ccc(F)cc2)c1O	86.3	78.5	3.86911	0.595	93.4	1.43	96.3	0.703	99.7	1.88	98.6
DDD01073482	Oc1cc2CCCc2cc1CN1CCC(CC1)C(=O)c1ccccc1	90.1	75	1.34536	0.598	93.1	1.73	94.9	0.607	99.4	2.3	90.5
DDD01028790	CC(C)N1CCC2(CCCN(C2)c2nccc(n2)C(F)(F)F)CC1	81.9	73.6	3.66606	0.606	89.3	3.12	69	1.33	91.1	9.75	76.4
DDD01245028	CC1CCCCN1C(=O)c1coc(COc2cccc3cnccc23)n1	86.5	92.7333	2.37557	0.61	94	0.751	97	0.469	99.8	0.568	97.7
DDD01246037	Clc1ccccc1C1(CCNCC1)c1ccnc(n1)C1CC1	73.5	77.8	0.953939	0.611	89.2	7.25	72.8	1.02	93.1	4.41	78
DDD01029091	Fc1cccc(CN2C[C@H]3CN(Cc4ccccn4)C[C@H]3C2)c1	89.4	87.4	2.60576	0.615	95.3	1.16	94	0.354	100	2.34	90.2
DDD01076992	Brc1ccc(cc1)C1(CNCc2cc[nH]c2)CCOCC1	74.5	61.9667	8.00521	0.615	82.1	0.715	95.6	0.407	99.6	3.08	54
DDD01249015	NC1(CCCC1)C(=O)NCC1CCCN(Cc2ccccc2F)C1	85.6	70.4	2.69072	0.621	89.1	> 12.5	55.5	1.47	87.8	> 4.16	77.3
DDD01079169	Cc1cn2CCCC(CNCc3ccc(C)s3)c2n1	91.1	86.5333	4.42982	0.626	93.4	1.64	93.3	0.471	100	2.25	83.8
DDD01027665	Cc1cc(CN2CCC(CNS(=O)(=O)c3ccc(Br)s3)CC2)c(C)o1	91.6	73.7333	3.96274	0.626	89.4	3.89	82	1.08	95	> 12.5	32.7
DDD01082023	COCCN1CCC2(CC(NCc3ccc(C)s3)c3ccccc23)CC1	77.2	82.5333	1.00167	0.629	90	7.58	77.9	1.55	96.4	2.42	82.4
DDD01246828	CCN1CCN(C[C@@H]2CN(C[C@@H]2CO)c2ncc(Cl)cc2F)CC1	92.2	94.6	1.34536	0.631	94.8	1.58	98.3	0.961	99.3	1.11	100
DDD01251782	CCc1[nH]c2c(CNc3nc(C)cc(NC)n3)cc(C)cc2c1C	89	96.8333	0.208167	0.634	95.7	0.765	89.4	0.158	98.4	0.696	98
DDD01038246	Cc1ccccc1CNCc1cc(Cl)ccc1O	75.4	72.2333	8.11932	0.637	92.4	11	69.3	5.6	89.5	2.6	97.5
DDD01255349	CN1CCC(C1)C1CCN(Cc2cccc(c2)-n2cccn2)CC1	85.7	88.5	6.75056	0.648	93.2	0.818	97.1	0.46	100	2.05	94.8
DDD01257555	CN(CC1CCCN(CCc2ccc(Cl)cc2)C1)Cc1[nH]cnc1C	82.9	78.9667	6.90821	0.651	93.5	1.62	99.6	0.463	99.9	0.963	98.8
DDD01075305	CC(C)C1CCCN1Cc1csc(n1)N(C(C)=O)c1ccc(F)cc1	90.3	64.1333	5.58957	0.653	84.5	6.08	57.5	2.69	92.1	> 4.16	62.8
DDD01078804	Cc1cccc(c1)C1(CCCC1)NCCCS(C)(=O)=O	88.9	71.4667	4.57857	0.659	85	12.1	56.6	1.93	85.9	6.57	74.2
DDD01058935	FC(F)(F)c1cc(nc(n1)-c1ccsc1)C1CCNCC1	89.2	63.5667	3.66924	0.665	88.6	> 12.5	64.4	> 1.39	92.1	4.36	60.5
DDD01251343	Cc1nc(c[nH]1)-c1cc(Cl)cc2CC(CN)Oc12	94.4	88.3	3.5171	0.666	94.6	> 12.5	-0.28	3.7	84.3	> 1.39	94.4
DDD01257948	CN(CC1CCCN(CCc2ccc(Cl)cc2)C1)Cc1cccc(O)c1	83.5	82.4	2.40624	0.669	94.6	2.24	97.4	1.38	99.5	0.802	98
DDD01249169	C(N1CCCCC1)c1ccccc1Oc1nccc2occc12	72.9	67.3333	14.0233	0.688	87.1	> 12.5	34.1	1.52	78.9	7.19	73.8
DDD01028772	C(O[C@@H]1CCN(C[C@@H]1Cc1ccccc1)C1CCOCC1)C1CC1	74.9	71.2667	3.80307	0.689	87	> 12.5	70.2	1.04	91.3	7.17	69.9
DDD01059731	N[C@@H]1CCC[C@@H](Oc2ccc(F)cc2Oc2ccccc2)[C@@H]1O	77.4	71.7	5.23737	0.69	93.5	> 1.4	89.8	> 1.39	98.4	4.96	86.9
DDD01065665	CN1CCC(O)(CNCc2ccc(F)c(c2)C(F)(F)F)CC1	83.3	65.9667	6.45084	0.705	90.5	> 12.5	33.7	4.45	88.8	3.17	86.1
DDD01252026	CN1CCN(Cc2ccccc2Oc2nccc3occc23)CC1	77.4	56.7333	12.8099	0.71	83.5	> 12.5	26.1	2.91	85.7	> 4.16	63.4
DDD01057239	COc1ccccc1C1(CCCC1)NCc1c(C)nc2c(C)cccn12	89.2	70.5667	1.12398	0.711	89	4.35	60.6	1.55	92	> 1.39	68.9
DDD01034133	CCN1CCC2(CC1)CC(NCc1cccc(C)n1)c1ccccc1O2	91.3	73.0333	0.51316	0.717	90.5	11.7	67.5	3.23	88.1	10.3	79.5
DDD01252463	CN(Cc1sccc1C)CC1(CCNCC1)c1ccc(C)cn1	77.4	63.7333	6.61236	0.733	78.8	> 12.5	41.3	1.59	81.7	> 12.5	57.2
DDD01034171	CCN1CCC2(CC1)CC(NCc1ccncc1)c1ccccc1O2	77.7	59.8333	7.82326	0.751	87.7	> 12.5	61.8	3.05	86	> 4.16	74
DDD01028783	CN1CCC2(CCCN(C2)c2nccc(n2)C(F)(F)F)CC1	79.4	63.1667	2.79702	0.754	87.2	> 12.5	60.6	3.57	84.9	8.82	74
DDD01026662	CN(C)CCCNCCC(C1CCOC(C)(C)C1)c1ccc(C)cc1	83.6	83.4	6.55973	0.755	96.2	7.59	95.3	5.89	98.8	1.57	97.5
DDD01300263	CC(O)CN1CCC(CNCc2cccc(Cl)c2)CC1	87.9	63.2	4.34856	0.758	89.7	5.96	89	2.57	98	3.65	89.5
DDD01243747	Oc1cccc2ccc(CN3CCC4(C3)CCNCC4)nc12	89.9	63.4667	5.6359	0.763	92	0.642	97.9	0.231	101	10.8	75.2
DDD01056871	Cc1n[nH]cc1C(=O)N1CCc2onc(Nc3c(C)cccc3C)c2C1	93	62	15.1086	0.765	93.6	1.9	87.7	1.38	96.9	2.52	94.1
DDD01247321	CC(C)CN1CCCC1c1ccc(s1)C(=O)Nc1cccnc1	87.5	72.1333	3.95517	0.766	91.9	4.09	94.3	2.12	99.9	4.77	91.6
DDD01031591	Cc1ccc(CN2CCC3(CCN(Cc4ccco4)CC3)CC2)cc1	91.7	76.8667	2.96873	0.77	92.1	7.27	74.1	0.938	94.4	6.72	84.1
DDD01032287	CN1[C@H](Cn2cccn2)C[C@@H]2CN(Cc3cccs3)CC[C@H]12	75.8	70.5333	6.28517	0.772	80.2	> 12.5	45.9	> 1.39	85.9	> 4.16	67.6
DDD01058754	Fc1cccc(CN2CCC(CC2)c2cc3ncccc3cn2)c1F	89.4	97.4	0.87178	0.781	94.4	1.06	95.6	0.571	99.9	0.309	86.9
DDD01031337	Fc1ccc(CN2CCC3(CCN(Cc4nccs4)CC3)CC2)cc1	86.6	74.1667	1.55027	0.783	88.8	8.85	69.4	1.46	87.9	> 1.39	71.7
DDD01246660	CCN1CC(CC2(CCN(Cc3ncc[nH]3)CC2)C1)c1ccccc1	88.1	64.8	3.40441	0.786	90.9	7.46	59	3.35	85.5	3.39	89.2
DDD01061827	COc1ccc(cc1Cn1cccn1)C(C)NCc1ccsc1	73.1	58	5.45619	0.788	81.9	> 12.5	38.8	1.78	68.9	> 4.16	58.7
DDD01257414	CC(C)n1ccnc1C1CCCN(C1)c1ccnc2ccccc12	84	62.8667	6.14193	0.799	94.6	2.09	95.8	1.64	99.7	1.94	98.5
DDD01073718	CC(NCC1CCN(CCO)CC1)C1=CC=C(Cl)C=C1	93.9	83.2333	0.23094	0.812	94.7	2.47	92.8	0.695	98.2	0.844	94.5
DDD01034784	CCOc1ccc(Br)cc1C1CCCCN1	78.2	68.1333	8.5143	0.814	86.8	> 12.5	60	> 1.39	90.9	2.78	65.2
DDD01038245	Oc1ccc(Cl)cc1CNCc1cccc(c1)C(F)(F)F	89	73.9333	5.85605	0.815	91.9	> 4.16	64	10.6	79.2	3.03	95.3
DDD01076928	Brc1cccc(c1)C1(CNCc2cc[nH]c2)CCOCC1	83.1	74.9667	1.04083	0.822	85.7	1.56	86.3	0.694	99.3	5.62	82.3
DDD01296688	COc1cc(CNCC(O)c2cccc(F)c2)cc2OCOc12	92.4	66.8667	7.68136	0.824	91.8	3.64	88.9	1.77	98.5	4.84	88.3
DDD01070491	CCN1CCN(CC1)c1ccc(F)cc1C(C)NCc1ccccn1	85.6	64.8	1.35277	0.827	82.8	> 12.5	53	1.9	84.6	> 4.16	73.8
DDD01249452	CC(C)[C@@H]1CN(C[C@H]1N(C)C)C(=O)C1(CCN(C)CC1)c1ccccc1	83.7	55.9333	14.3514	0.83	90.5	6.23	84	2.18	95.6	3.27	87.8
DDD01058940	CC(C)(C)C(=O)N1C[C@@H]([C@H]2CN(CC[C@@H]12)C1CCCCC1)c1ccsc1	77.3	61.4	1.3	0.84	83.6	> 12.5	59.1	2.03	90.2	8.8	74.2
DDD01058356	Cc1nc(cc(n1)-c1ccc(F)c(F)c1)C1CCNCC1	84.1	52.8333	3.76873	0.843	88.2	> 12.5	44.3	2.02	86.7	2.1	68.9
DDD01079955	NCC1(CCOCC1)c1cccc(Br)c1	79.5	63.2667	1.38684	0.844	87.3	4.79	58.8	1.63	85.9	> 4.16	76.8
DDD01034787	CCOc1ccc(Br)cc1C1CCCN1	72.9	65.8	6.93974	0.848	85.8	4.88	59.1	1.38	86.3	7.59	78.7
DDD01036700	CN(C)[C@@H]1CCN([C@H]1Cc1ccccc1)c1ncccn1	78.1	68.5	2.84781	0.852	85.6	> 12.5	47.6	2.4	80.9	> 4.16	74.7
DDD01075651	CCC(NCC1=C(C)C=CC=C1)C1=C(OCC(=O)NC)C=CC=C1	80	57.4667	8.62168	0.853	76.9	> 12.5	60.7	2.43	84.1	#N/A	#N/A
DDD01075721	COc1ccccc1C1(CNCc2cccc(O)c2)CCOCC1	82.8	75.9	12.6693	0.854	85.5	10.3	67.7	2.2	90.3	> 4.16	68.7
DDD01254021	OC(CNCc1ccccc1C(F)(F)F)c1ccccc1	82.4	65.9333	5.20032	0.866	91.4	4.82	84.3	1.76	97.4	3.66	87.9
DDD01080015	COCCCN1CCCN(CC1)C(C)C(=O)Nc1cccc(I)c1	90	80.9	3.6428	0.871	92	2.64	71.5	1.94	94.8	10.6	77.7
DDD01245291	OC1(CN2CCC(CC2)Oc2cccc(c2)C(F)(F)F)CCNC1	90.3	63.3333	19.8913	0.875	93.8	2.08	95.9	0.958	99.5	1.93	96.4
DDD01074443	CCN(CC)Cc1ccccc1NC(=O)N(C)Cc1ccccc1O	85	54.7	2.86182	0.879	90	3.95	89.7	3.26	95.8	6.28	87.8
DDD01244648	CN(Cc1cnc(C)n1C)C1CCCN(CCc2ccccc2)C1	90	53.2667	13.6361	0.883	88.5	6.24	55.1	1.78	88.7	#N/A	#N/A
DDD01076008	CC(C)Oc1ccc(cc1)C(O)CNCc1ccccc1C	92.4	59.7667	20.066	0.893	92.4	3.39	93.9	1.47	99.7	3.77	92.7
DDD01247138	CN(C)CC1COCCN(Cc2ccc(cc2C)-n2cccn2)C1	73	44.6	28.746	0.896	83	> 12.5	48	5.64	81.9	> 4.16	60.8
DDD01038247	COc1cccc(CNCc2ccccc2Cl)c1O	77	53.6667	0.763763	0.904	89.5	7.91	79.1	1.97	96.2	5.22	87.5
DDD01026217	CN1CC[C@@H](C[C@H](O)C1)N(Cc1ccccc1)Cc1ccccc1	72.1	63.8333	6.54319	0.912	80.7	> 4.16	69.3	> 4.16	93.7	7.31	73.4
DDD01074859	CCc1cc(CNCc2ccccc2N(C)C2CCN(C)CC2)on1	74.5	59.0667	5.16172	0.916	83.3	> 12.5	55.6	3.22	82	9.57	72
DDD01060871	Cc1cccnc1CN1CC[C@H](Oc2cccc(F)c2)[C@@](C)(O)C1	75	83.9	4.25793	0.918	90.5	1.92	93.1	0.553	100	2.59	82.8
DDD01077862	CC(NCCN1CCC(CC1)N(C)C)c1ccc(Cl)s1	75.4	68.5	7.01498	0.918	87.7	4.33	83.2	1.35	97.3	2.87	89
DDD01246472	C(Nc1nc(nc2CNCCc12)-c1ccccc1)c1n[nH]c2CCCc12	89.6	77.7667	6.1403	0.919	92.6	4.12	97.5	0.635	99.5	2.89	98.2
DDD01063806	CN(CC1CCN(CCO)CC1)Cc1cc(F)cc2cccnc12	84.7	73.2667	2.41937	0.92	93.1	3.63	96.1	2.11	100	1.11	93.2
DDD01059689	CC(C)CNC(=O)C1(Cc2ccccc2-c2cccs2)CCNC1	71.7	66.6667	2.20076	0.92	73.8	> 12.5	49.4	> 1.39	87.3	> 12.5	45.7
DDD01038249	COc1cccc(CNCc2ccc(F)cc2Cl)c1O	79.5	62.6	7.26292	0.941	87.2	> 4.16	36	2.78	95.4	> 4.16	92.8
DDD01069466	CC(Oc1cccc(C)c1)C(=O)NCC1(CCCC1)N(C)C	81.4	57.9	15.782	0.948	82	> 12.5	46.7	2.5	85.7	2.14	64.8
DDD01028015	COc1ccc(CCC(=O)NCCN2CCC(CC2)c2cccs2)cc1	75.8	66.7667	3.96779	0.954	85.7	11.4	69.6	2.24	86.6	4.17	71.9
DDD01243745	CN(CCO)Cc1cc(Cl)ccc1OCC(O)CN1CCCCCC1	81.5	52.8667	4.82632	0.954	93.5	2.92	97	1.45	98.8	1.09	99.1
DDD01298744	CCN(CC)C(CNC(=O)c1c(C)noc1C(C)C)c1ccsc1	78.7	74.7667	2.02073	0.956	85.7
DDD01078433	NC(=O)CN1CCC(CC1)Nc1ccnc2ccc(Cl)cc12	94.4	51.6	14.7336	0.956	95.1	1.98	99.5	1.05	100	1.02	98.2
DDD01057418	CCOc1ccc(CN2CCCC(C2)c2cc3ncccc3[nH]2)cc1	85	90.5	1.96977	0.959	95.5	1.07	96.8	0.872	100	0.934	95.7
DDD01251139	Fc1ccccc1C1(CNC2CCOC3(CCOCC3)C2)CCCC1	76.3	77.7667	4.42305	0.959	86.2	8.87	69.5	1.43	89.3	0.587	71.8
DDD01251957	CN(CCCO)Cc1cc(Cl)ccc1OCC(O)CN1CCCCCC1	90.7	48.6667	5.34821	0.985	94.6	2.71	99.2	> 1.39	101	2.75	90
DDD01251474	CN(Cc1cc2cc(F)ccc2[nH]1)c1cc(nc(C)n1)C1CCNCC1	75.9	49.9667	18.5263	0.986	93.3	2.3	98.2	0.415	100	3.2	90.9
DDD01076306	COCC(O)CN(C)c1ccnc2cc(Br)ccc12	94.4	60.7667	1.72143	0.987	94.3	1.81	97.7	1.51	99.9	2.43	95.6
DDD01038248	COc1cccc(CNCc2cccc(Cl)c2)c1O	85.2	60	4.08412	0.993	92.4	4.63	87.8	1.9	98	2.69	92.1
DDD01256178	COc1ccc(c(OC)c1OC)-c1ccccc1CCN	81.8	72.2667	8.89963	0.996	87.9	3.3	83.2	2.11	98.8	3.03	89.5
DDD01085292	Fc1cnc(nc1)N1CCCC2(CCN(Cc3ccsc3)C2)C1	87.6	69.8667	5.88246	1	83.3	2.31	68.3	1.53	92.4	> 4.16	70.7
DDD01245572	CCC[C@H]1CN(C[C@@H]1N)S(=O)(=O)c1ccc(s1)-c1c(C)noc1C	72.8	65.9333	3.44287	1	81.3	> 12.5	19	2.92	74.1	5.57	55.3
DDD01246029	CCCOc1ccc2ccccc2c1CN1CC[C@@]2(O)CCNC[C@H]2C1	93.2	62.2333	11.5379	1	92.4	2.85	96.3	1.42	98.8	2.76	96.5
DDD01038243	Oc1ccc(Cl)cc1CNCc1ccccc1Cl	76.4	70.8333	6.50103	1.02	90.3	> 12.5	59.4	4.2	88.4	> 12.5	34.6
DDD01061915	CCC(CC)(CN)NC(C)c1ccccc1	83.4	61.1333	9.44951	1.02	85.9	> 12.5	49.2	> 1.39	87.7	#N/A	#N/A
DDD01029521	C(N1CCC2(C1)CCCN(C2)c1ccccn1)c1ccsc1	82.6	59.9	5.91946	1.02	83.9	3.75	64.3	2.51	86.9	1.88	66.8
DDD01071935	COc1ccc(C(=O)NCCCOC(C)c2ccccc2)c(OC)c1	78.9	59.3	11.1072	1.03	85.3	9.88	67.4	3.26	90.2	> 4.16	72.8
DDD01060982	Cc1ccsc1CN(Cc1cccnc1)C1CC(C)(C)NC(C)(C)C1	81.4	75.2667	1.85562	1.04	88.1	4.19	61.9	1.59	95.6	> 4.16	70.5
DDD01073649	CC(NCC1CCN(CCO)CC1)c1ccc(F)c(Cl)c1	84.1	72.1	2.95973	1.04	87	3.46	94.4	0.802	99.5	1.9	91.9
DDD01057018	Cc1cccc(CN2CCCC2c2cccc(Nc3nccs3)n2)c1	88.1	63.5	2.30651	1.04	94.6	0.914	93.5	0.53	101	#N/A	#N/A
DDD01297560	CC(O)CN1CCC(CNCc2cccc(OC(F)(F)F)c2)CC1	80.1	54.5333	9.25761	1.04	91	> 12.5	58.6	5.4	87.8	2.94	91.2
DDD01077091	COCCC1(CNC(=O)Nc2ccnc(C)c2)CCCC1	72.6	50.1667	2.70617	1.04	79.6	> 12.5	48.9	> 1.39	82	> 12.5	47.9
DDD01035544	C(NC1=NCCN1)c1ccccc1Sc1ccc2OCOc2c1	83.7	80.8667	2.17792	1.05	85.5	7.86	75	1.67	95.1	> 4.16	65.9
DDD01070293	CC(C)(C)C(=O)NCCNCc1ccc(Cl)c2cccnc12	77.7	69.5	6.1	1.05	82	> 12.5	37.6	1.51	83.4	2.25	64.4
DDD01058816	Clc1cccc(N[C@H]2CCCN[C@H]2Cc2ccccc2)c1	92.8	67.4	1.4	1.06	95.6	1.92	100	0.64	101	3.54	94.8
DDD01070009	O=C(CCN1CCCC1c1cccc2OCCOc12)N1CCCCC1	73.2	58.6333	6.96156	1.06	80.3	6.96	51	2.64	84.9	#N/A	#N/A
DDD01059475	Cc1cccc(Nc2cccc(n2)C2CCCN(Cc3ncc[nH]3)C2)n1	89.4	88.9333	4.61988	1.07	95.8	1.69	98.9	> 1.39	100	0.965	92.2
DDD01025218	CC[C@H]1CN2CC[C@H]1C[C@@H]2CNCc1ccc(OC(F)(F)F)cc1	85.7	71.5667	6.31057	1.07	92.1	2.91	93	> 1.39	100	4.16	89.4
DDD01247914	CCc1ccc2nc(NCCCN(CCO)CCO)cc(C)c2c1	83.4	49.9333	1.861	1.07	91.1	3.94	92.3	1.68	99.8	3.61	94
DDD01250092	CC(C)c1nccc(n1)C1(CCNCC1)c1ccccc1Cl	83.4	68.6	7.9925	1.08	86.6	3.82	58.4	1.95	90.3	5.4	74.3
DDD01081909	CO[C@@H]1CCN(Cc2ccoc2)C[C@@H]1Cc1ccccc1	89	57.0667	5.42433	1.08	85.9
DDD01258014	CN(Cc1nccs1)c1nc(nc2CCNCCc12)-c1ccccn1	83.7	70.8	9.83819	1.09	89.8	2.11	76.9	0.455	98	8.5	68.8
DDD01065612	CC(NCCc1nccn1Cc1ccccc1)c1ccsc1	83.5	67.5333	0.862168	1.09	87.3	4.05	68.1	0.666	88.3	0.96	77.4
DDD01250810	CC(C)(C)CNCC1(O)CCCN(Cc2ccccc2F)C1=O	84.5	67.3667	8.33926	1.09	82.3	> 12.5	55.3	5.69	80.8	4.31	64.2
DDD01067280	O=C(CC1CCCC1)NCCNCc1cccc2OCCOc12	71.6	56.8	2.86182	1.09	84.7	> 12.5	64.2	> 1.39	89.2	> 4.16	67
DDD01025850	CCC1CN(CC(=O)NCCN2CCCCC2)c2ccccc2S1	72.3	57.7667	5.43722	1.1	87.2	5.56	55.4	2.56	83.2	7.99	74.7
DDD01033375	CN(C)[C@@H]1CCN([C@H]1Cc1ccccc1)c1ncc(F)cn1	89	75.5	5.01099	1.11	86.7	5.55	53.2	2.25	86.9	> 4.16	74.6
DDD01255900	Cc1c(C(=O)N2CCC(CC2)N2CCCCC2)n(C)c2ccc(Cl)cc12	88	70.3333	18.5058	1.11	93.8	3.56	96.3	1.7	98.9	#N/A	#N/A
DDD01254555	CNc1nc(C)cc(NC2CCCN(C2)C2Cc3ccccc3C2)n1	89.5	62.6	16.7033	1.11	92.9	2.19	82.6	1.07	100	1.02	87
DDD01254091	COCCN(C)Cc1cc(Cl)ccc1OCC(O)CN1CCCCCC1	83.9	52.1	8.90674	1.11	94.7	3	98.3	> 1.39	101	3.77	91.7
DDD01246731	Cc1cccc(CN2CCC(Cc3ccccc3F)CC2)n1	94	75.7667	2.49466	1.12	94.3	2.01	95	0.529	100	5.16	92.8
DDD01059734	CN([C@@H]1CCC[C@@H](Oc2ccccc2)[C@@H]1O)C(=O)c1ccon1	79.8	57.3333	6.61236	1.12	85.7
DDD01076697	CN1CCN(CC1)c1ccccc1NC(=O)NCCc1ccccc1	83.9	49.3	3.96106	1.14	82.8	> 12.5	65.5	> 1.39	89.4	> 12.5	52.5
DDD01060652	Cc1cc(C)c2cc(CNC3CCCCC3)c3nn(C)c(=O)n3c2c1	79.7	60.9667	6.03435	1.15	88.2
DDD01034970	Cc1c(C)c2cccc(Cl)c2n1CC(O)CN1CCN(CCO)CC1	88.6	52.2333	6.92917	1.15	85.4	3.79	86.8	2.24	95.9	> 4.16	73.1
DDD01257805	Fc1ccc(cc1Cl)C(=O)N1C[C@H]2CC[C@@H](C1)N(Cc1ccccc1)C2	74.1	72.2667	6.85371	1.16	85.8	5.31	91.8	2.39	97.8	#N/A	#N/A
DDD01031609	Cc1ccc(CN2CCCC3(CCN(Cc4ccoc4)CC3)C2)cc1	79.8	61.7333	5.36315	1.16	88.7	3.17	88.7	0.742	98.3	#N/A	#N/A
DDD01296730	COc1cc(CNCC(O)c2ccc(F)cc2F)cc2OCOc12	85.5	59.5333	3.92471	1.16	88.4	4.89	87.3	2.48	98.1	4.87	85.6
DDD01253863	C(N1CCC2(CC1)CC(CN(C2)C1CC1)c1ccccc1)c1cscn1	80.4	48.5	8.3863	1.16	78.8	4.6	85	3.45	96.3	> 4.16	70.2
DDD01028018	O=C(NCCN1CCC(CC1)c1cccs1)NCCc1ccccc1	77.6	68.6333	3.95517	1.18	87.7	5.18	64	1.42	87.1	> 4.16	69.6
DDD01069885	CNS(=O)(=O)c1cccc(c1)C(C)NCc1ccccc1OC	86.6	53.9333	11.0229	1.18	80.1
DDD01076128	CC(Cc1ccsc1)NC1CCN(CC1)c1cc(C)nc(C)n1	85.8	72.1	2.78747	1.19	89.6	2.25	81.4	1.09	96.6	7.78	72.7
DDD01252459	COCCn1ccnc1CN(Cc1sccc1C)Cc1ccccn1	92.9	71.0667	2.57164	1.19	90.8	3.48	94.7	0.73	99.1	> 4.16	87.8
DDD01032557	C(CN1CCC2(CCCN(C2)c2cccnc2)CC1)N1CCCC1	92	61.8333	6.53784	1.19	92.6	7.21	83.2	1.41	99.7	2.44	93.7
DDD01249772	CCc1ccc(CN(CCN(C)C)Cc2ccc(C)s2)nc1	91.9	65.2	3.73229	1.2	90.5	1.02	95.2	0.278	101	3	93.4
DDD01254473	CCc1ccc(nc1)C1N(Cc2nccn2CC)CCc2[nH]cnc12	90.1	64.4333	4.50814	1.2	91.2	1.54	91	0.448	98.8	2.64	78.6
DDD01030549	CN1CCn2c(cnc2C11CCN(CC2CC2)CC1)-c1cccc(F)c1	76.5	59.8	2.17945	1.2	84.4
DDD01058682	Clc1cccc(C[C@@H]2NCCC[C@@H]2Nc2ccccc2)c1	88.7	79.4	1.56205	1.21	94.7	1.83	99.1	0.857	101	3.39	93.6
DDD01255494	Clc1cccc2c3CN(Cc4cc5CNCCCn5n4)CCc3[nH]c12	89.7	63.1	1.94679	1.21	91.2	3.79	90.6	1.07	99.6	3.52	91
DDD01063924	CC(C)(NCc1cccc(O)c1)c1ccc2OCOc2c1	88.9	55.7	1.58745	1.21	84.9
DDD01258113	Cc1cc(F)ccc1CN1CCC(O)(CN2CCCCC2)C1	78.8	59.3	3.8	1.22	83.7
DDD01057885	Cc1cc(Cc2cccc(c2)C(F)(F)F)cc(n1)C1CCCNC1	93.9	65.1	0.866025	1.24	92	4.53	95	0.958	100	#N/A	#N/A
DDD01253448	Cc1cc(c(C)cc1Cl)S(=O)(=O)NCC1CNCCOC1	75.4	51.7	3.38083	1.24	89.3	> 4.16	24.9	1.64	89	#N/A	#N/A
DDD01070576	CCN1CCN(CC1)c1ccc(F)cc1C(C)NCc1cscn1	81.1	63	4.71487	1.25	87.1	> 12.5	47.9	2.44	81.9	7.18	78.2
DDD01077297	Cc1cnn(CCCNCc2csc(COc3ccccc3)n2)c1	70.9	62.9333	2.85715	1.25	85.8	7.24	63.7	1.2	86.7	#N/A	#N/A
DDD01297562	CC(O)CN1CCC(CNCc2ccc(OC(F)(F)F)cc2)CC1	86.9	52.4667	5.75181	1.25	90.4
DDD01250826	COc1ccnc(CN2CCCC(CCc3ccccc3)C2)c1OC	90.1	67.2333	5.52479	1.26	92.5	1.41	93	0.447	99.3	#N/A	#N/A
DDD01252418	COc1cccc(OC)c1CN1CC(=O)N(CC1C)c1ccc(C)cc1	75.2	61.7	7.7324	1.26	89.5	3.67	75.8	1.8	93.6	#N/A	#N/A
DDD01069824	CCN1CCC(CNCC2=C(OC)C=CC(C)=C2)C1	82.7	57.0333	4.41059	1.26	90.1
DDD01059073	CCn1cncc1CN1CCN(CC2(CC2)c2ccc(C)cc2)CC1	70	54.8	5.40648	1.26	85.6
DDD01250237	CCN(C)C[C@@H]1CN(Cc2cccc(C=C)c2)C[C@@H]1CO	87.6	52.1667	3.41223	1.27	83.3
DDD01074373	COc1ccc(CN2CCNC(=O)CC2)cc1SC(F)(F)F	74.5	79.4	5.09215	1.28	75	> 4.16	57.7	0.735	70.4	> 4.16	51.3
DDD01026225	CN1CC[C@@H](C[C@H](O)C1)N(CC1CC1)Cc1ccccc1	80.8	62.8	4.50333	1.29	82
DDD01257008	CO[C@H]1CN(C[C@@H]1NC(=O)c1cc(n[nH]1)-c1ccccc1O)C(C)C	90	62.0333	1.96554	1.29	94.7	7.18	87.1	3.21	97.2	4.52	94.2
DDD01250162	CCc1[nH]c2c(CNc3cc(C)nc(NC)n3)cc(C)cc2c1C	85.1	97.6	0.173205	1.31	92.3	> 12.5	38.8	> 12.5	45.4	1.55	94.1
DDD01075652	CCC(NCc1cccc(Cl)c1)c1ccccc1OCC(=O)NC	82.8	56.1	7.48064	1.31	76.5
DDD01061089	COc1cccc(c1)[C@H]1CN([C@@H]2CCN(Cc3ccsc3)C[C@H]12)C(C)=O	73.9	55.4	3.86911	1.31	82.2
DDD01245335	CC(C)=CCN1CCC2(CC1)[C@@H](O)[C@H](N1CCSCC1)c1ccccc21	78.5	48.0333	13.091	1.31	82.4
DDD01063726	CC(O)CN1CCC(CN(C)Cc2cc(F)cc3cccnc23)CC1	87.2	93.9333	1.98578	1.33	92.8
DDD01243506	CNc1cc(C)nc(NC2CCCN(C2)C2Cc3ccccc3C2)n1	92.8	92.6	4.22966	1.33	92.2	1.16	94.3	0.707	100	0.957	96.1
DDD01027290	Cc1ncc(CNCCO)c2cc(oc12)C(=O)c1ccc(Br)cc1	89.3	70.2333	6.09617	1.35	90.8	> 12.5	59.4	1.63	98.3	3.32	63.7
DDD01031368	C1CC2(CCNCC2)c2ccc(cc12)-c1cccnc1	86.9	53.3333	2.20303	1.35	95.6
DDD01250738	COc1ccccc1CCN1CCCC(CN(C)Cc2ccc(C)o2)C1	87.8	43.4333	17.0863	1.36	86.1
DDD01058479	OC1(CCN(Cc2ccccc2N2CCCC2)CC1)c1ccc(F)cc1	71.9	50.7	3.98372	1.38	88.9	3.24	76.5	1.95	94.3	5.91	82.4
DDD01028129	COc1ccc(NC(=O)Nc2cnc(nc2)N2CCN(C)CC2)cc1Cl	87.9	61.1	4.79479	1.39	94.1	> 12.5	14.8	4.41	57.8	> 12.5	38.2
DDD01065609	CC(NCCc1nccn1Cc1ccccc1)c1cccs1	86.8	55.9667	7.42181	1.39	85.7
DDD01296287	CCN1CCCC(CNC(=O)C2(CCC2)c2cc(C)cc(C)c2)C1	75.8	53.0667	2.63502	1.39	75.3
DDD01297989	CN1CCCC1CNC(=O)CCCOC1=CC(Br)=CC=C1	71.7	44.8333	9.75722	1.4	83.9
DDD01024952	O=C([C@@H]1Cc2[nH]cnc2CN1Cc1cc2ccccc2o1)N1CCCC1	95	52.7667	2.51064	1.42	91
DDD01067448	Fc1ccc(cc1)C1(CNC2=NCCN2)CCCC1	83.5	68.4333	5.92312	1.43	88.3	6.73	82.9	1.18	95.9	3.3	94.1
DDD01064806	C(C1CCN(CC1)c1ccnc2ccsc12)N1CCOCC1	92.3	67.4333	10.9665	1.43	94.6	1.38	99.7	1.12	100	1.15	100
DDD01066387	CN(C)CCN(Cc1cccnc1)C(=O)c1ccn(n1)-c1ccccc1	87.4	46.2333	8.08538	1.43	81.1
DDD01062588	CC(C)(C)c1cn2CCCC(CNCc3ccccn3)c2n1	92.9	46.1	8.22861	1.44	91.5	2.9	90.4	1.41	98.6	1.72	87.3
DDD01244394	NC1CCCCN(Cc2cc(no2)-c2ccccc2OC(F)(F)F)C1	71.1	64.8333	2.0108	1.45	88.9	> 4.16	84.8	> 1.39	97.5	> 4.16	69.6
DDD01024774	Clc1ccc(cc1)S(=O)(=O)NC[C@H]1C[C@@H]2CCN1C[C@@H]2CN1CCCC1	89.4	53.2	11.6116	1.46	91
DDD01081619	C(C1CC1)N1CC[C@H]2[C@H](C[C@@H](Cn3cccn3)N2c2nccs2)C1	89.9	76.5	4.00375	1.48	94.2	2.56	90.1	1.87	99.5	2.7	73.6
DDD01247796	CCN(CC)CCN(C)c1nc(nc2CNCc12)-c1ccc(Cl)cc1	88.3	92.6	2.16564	1.5	94.9	3.45	74.2	2.79	99.3	4.27	89.9
DDD01076007	CC(C)Oc1ccc(cc1)C(O)CNCc1ccccc1C(F)(F)F	83.2	51.4	18.5332	1.5	80.1
DDD01297525	OCCN1CCC(CNCC2=C(OC(F)(F)F)C=CC=C2)CC1	95.8	50.4667	7.25695	1.51	88.7	> 12.5	54.6	5.42	88.7	7.44	77.9
DDD01063614	Cn1ccnc1CNC1CCCOc2c1ccc1ccccc21	77.2	58.2667	13.2478	1.52	80.3
DDD01251767	CN(C)CCN(Cc1ccc(cc1)S(C)(=O)=O)Cc1ccccc1C	80.4	47.9333	13.7613	1.52	76.8
DDD01248990	CC(C)(C)n1cc(cn1)C1=CCN(CCN2CCCCCC2)CC1	71.5	54.5667	9.69244	1.53	78.1
DDD01058770	COc1cccc(OC)c1CNC(Cc1ccsc1)c1ccc(C)cn1	92.5	70.6	7.56241	1.56	93.2
DDD01250070	CN(C[C@H]1CC[C@@H](Cc2ccc3occc3c2)O1)C1CCN(C)CC1	85.8	56.1	2.62298	1.57	82.8
DDD01035543	Fc1ccccc1Sc1ccccc1CNC1=NCCN1	77.4	53.3333	5.42617	1.57	83.6
DDD01244613	CC(Nc1nc(nc2CCNCCc12)-c1ccccc1)c1cccnc1	90.9	54.6333	5.94755	1.58	92.9
DDD01027128	CC(C)n1ncc2c1NC(=O)CC21C(=O)Nc2c1c(Cl)ccc2Cl	83.5	62.8	13.9925	1.59	94.1
DDD01243772	Cn1cc(CN2CCCC(CCc3ccccc3C(F)(F)F)C2)cn1	87.9	61.7667	14.4306	1.59	82.8	4.26	66.1	4.34	88	4.89	62
DDD01300262	CC(O)CN1CCC(CNCC2=CC(=CC=C2)C(F)(F)F)CC1	83.1	46.7333	12.45	1.59	89.5	9.69	69.7	4.76	92.7	2.46	91.1
DDD01034957	COc1cccc(c1)-n1ccc2nc(ncc2c1=O)N1CCCC1	91.7	92.1667	1.85023	1.6	95.4	> 4.16	13.2	0.531	98.6	#N/A	#N/A
DDD01248607	C[C@H](Nc1nc(nc2CNCc12)-c1cccnc1)c1ncccc1C	78	77.2667	9.33613	1.6	92.2	1.59	79.2	1.37	99.4	3.91	91.2
DDD01250168	CSc1ccc(cc1)-c1nc(CN2CCC(CN)C2)c(C)o1	83.05	54.5333	14.7189	1.6	93.1
DDD01299704	C(Nc1ncnc2sccc12)C1CCCN1c1cccnn1	82	77.1	2.68514	1.61	92.3
DDD01065613	CC(NCCc1nccn1Cc1ccccc1)c1ccc(C)o1	80.7	60.9333	1.43643	1.62	82.8
DDD01035540	CC(N)Cc1ccccc1Sc1ccccc1	78.3	83.0667	2.13854	1.63	92	3.57	89.6	0.558	98.2	4.17	86.1
DDD01301801	COc1c(C)cnc(CN2CCC(CC2)N(C)C(C)C(N)=O)c1C	78.2	81.1333	5.58689	1.63	76.5
DDD01073292	Cc1cn2CCCC(CNCC3=Cc4ccccc4OC3)c2n1	79	78.4667	5.78734	1.65	93	4.19	89.5	1.84	99.3	2.32	83.8
DDD01059924	CN1CCCCC1c1ncc2CN(Cc3ccc(F)cc3)CCc2n1	86.4	66.1667	6.65833	1.65	84.5
DDD01082961	FC1(F)CCN(Cc2cccnc2)CC11CCN(C1)c1ccccc1	85.3	53.3667	2.8746	1.65	91.5
DDD01033585	CN(C[C@H]1OC[C@@H]2CCN(Cc3ccccn3)C[C@H]12)Cc1ccco1	70.9	50.1667	9.15442	1.65	91.7
DDD01250400	CCc1cnc(N)nc1NC(C)c1ccc(C)c(C)c1	73.8	79.8667	5.65184	1.66	81	2.84	94.8	0.373	99.6	4.48	62.1
DDD01078792	CS(=O)(=O)CCCNC1(CCCC1)c1cccc(Cl)c1	76	62.6333	2.53246	1.66	85	> 12.5	68.8	3.02	88	> 4.16	73.6
DDD01071406	CC(CNS(=O)(=O)c1ccc(Cl)cc1C)N1CCN(C)CC1	74.3	60.2333	4.3501	1.66	87.3	6.35	56.6	4.93	86.6	> 4.16	68.8
DDD01076782	CN(CCc1cccc2ccccc12)Cc1nc(N)nc(n1)N(C)C	92.2	62.1667	3.47755	1.67	91
DDD01250493	C[C@@H]1CN(CC[C@@]1(O)C1CCOCC1)C(=O)C1CCS(=O)(=O)CC1	71.2	49.8	8.14678	1.67	82.2
DDD01251707	Cn1cc(CN2CCCC(CCc3ccc(F)cc3F)C2)cn1	89.3	53.2667	11.133	1.69	81
DDD01235869	CC(C)[C@H](CO)Nc1nccc(n1)-c1c[nH]nc1-c1ccncc1	83.9	52.9	2.9	1.69	82
DDD01056528	CC1Cc2cc(ccc2N1C)-c1cncn1CCCn1nc(C)cc1C	87.4	83.3	7.49867	1.7	94.8
DDD01071325	Fc1ccc2c(c[nH]c2c1)C1=CCN(Cc2nnc(o2)C2CCC2)CC1	83.9	59.1333	2.99555	1.7	88.7
DDD01251951	OCc1csc(n1)N1CCCC(COc2cccc(F)c2)C1	81.2	76.2	1.253	1.71	79.1	> 12.5	45.9	3.99	82.9	1.63	63
DDD01073229	Cc1cn2CCCC(CNCC3=Cc4cc(Cl)ccc4OC3)c2n1	88.2	75.9667	9.06661	1.71	90.9
DDD01037626	CCc1ccc(cc1)-c1cc(nc(n1)N1CCC(N)CC1)C(F)(F)F	82.4	82.5	8.02932	1.72	93.8	1.86	98.9	0.828	100	#N/A	#N/A
DDD01058881	Cc1cc(CN2CCc3nc(nc(O)c3CC2)-c2ccncc2)c(C)s1	91	63.5	6.60076	1.72	88.5	9.43	79	2.93	93.4	6.28	78.2
DDD01270191	CN1CCCC(C1)c1cccc(Cc2ccccc2Cl)n1	70.3	54.1	4.05093	1.72	80.2
DDD01032334	C(Nc1ccccn1)[C@@H]1CCC[C@@H]2CN(Cc3cccnc3)C[C@H]12	75	53.8333	9.50807	1.72	81.5
DDD01067996	CCN(C)CC1CCN(C1)S(=O)(=O)c1cc(C)c(F)cc1Cl	79.3	52.8333	4.93592	1.72	86.1
DDD01025851	CCC1CN(CC(=O)NCCN2CCCCCC2)c2ccccc2S1	73.8	50.0333	9.45216	1.73	82.5
DDD01036239	C(C1CC1)N1CC2(CCN(CC2)c2ncccn2)c2ccccc12	86.3	64.9333	4.88399	1.74	90.6
DDD01063271	Clc1cc(CN2CCCN3CCCC3C2)c2ncccc2c1	89.5	50.8333	4.56107	1.74	93
DDD01246631	Cn1cc(CN2CCCC(CCc3ccc(F)cc3)C2)cn1	74.7	51.3333	5.11599	1.75	84.6
DDD01303472	COC1=NC=C(NC(=O)C2=CC=C(C=C2)N2N=CC(C#N)=C2N)C=C1	80.7	68.8	4.10366	1.76	84.1
DDD01024849	CN(C[C@H]1CN2CC[C@H]1C[C@@H]2CNC(=O)c1ccco1)c1ccccc1	71.2	55.8333	11.6895	1.76	83.2
DDD01255733	CC(Cc1ncccc1C)NC1Cc2ccccc2C1	89.2	53.7333	2.31589	1.76	81.8
DDD01074244	COc1ccccc1C(C)(C)NCc1ccc(C)o1	77.9	54.5333	3.8371	1.77	82.7
DDD01084184	Fc1cnc(nc1)N1CCCC2(CCN(Cc3ccoc3)C2)C1	73.7	57.4333	4.33167	1.79	83.1
DDD01060866	Cc1cnccc1CN1CC[C@H](Oc2cccc(F)c2)[C@@](C)(O)C1	80.2	56.5	4.94267	1.79	91.8
DDD01251823	CCN(CCN(C)C)c1nc(CCN)nc2sc(C)c(C)c12	89.8	53.5	7.47061	1.8	92.8
DDD01035542	Fc1ccc(Sc2ccccc2CNC2=NCCN2)cc1	80.4	64.6	3.04138	1.81	81.8
DDD01253542	CC(CCO)NCc1nc(c([nH]1)-c1ccccn1)-c1ccc(C)cc1	86	58.9333	19.6215	1.81	86.3
DDD01253377	CCC[C@H]1CN(C[C@@H]1NC(=O)C1(COC)CC1)c1nc(CO)cs1	71.7	55.8333	12.1722	1.81	80.7
DDD01301524	CN(CC1CCCN1c1cccnn1)Cc1ncc(o1)C(C)(C)C	80.7	53.2667	12.1989	1.81	86
DDD01056924	CN(C)CCN(Cc1ccc(C)o1)Cc1c(C)nc2sccn12	84.6	46.3333	8.35783	1.82	84.2	> 12.5	65.3	2.43	88.8	> 4.16	52.1
DDD01037044	COc1ccc(CN2CC[C@@H](O)[C@@H]2Cc2ccccc2)cc1	80.7	60.7667	6.92411	1.83	77.4
DDD01250518	OCC1(CC2CC2)CCCN(CCC(=O)NCc2cccc(Cl)c2)C1	80	56.8667	14.7314	1.83	81.8
DDD01257073	C1Cc2c(CN1)ncnc2N1CCCN(CC1)c1nc2ccccc2s1	85.2	50.9667	6.63953	1.83	84
DDD01075341	CC1CCCN(Cc2csc(n2)N(C(C)=O)c2ccc(C)cc2)C1	83.2	46.2667	13.8753	1.83	86.4
DDD01056530	CC1Cc2cc(ccc2N1C)-c1cncn1CCc1c(C)nn(C)c1C	82.6	71.2333	6.47868	1.85	94.7
DDD01070232	CCN(CC1CN(Cc2nc(no2)C2CC2)CCO1)c1cccnn1	73.3	53.7667	3.00888	1.86	79.6
DDD01249030	COc1ccc2[nH]c(CNc3cc(nc(C)n3)C3CCNCC3)cc2c1	84.1	61.1	26.8062	1.88	88
DDD01246904	CN(C[C@@H]1CCCN2CCCC[C@H]12)Cc1ccccc1-n1cccn1	76	54.0667	4.89524	1.88	85.8	> 12.5	53.8	3.73	73.6	8.42	72.9
DDD01074854	COCCOc1ccccc1CNCC1COC2(CCCC2)O1	74.1	54.0333	1.89297	1.89	84.3	> 12.5	29.8	2.71	75.6	2.13	71.9
DDD01075649	CCC(NCC1=C(Cl)C=CC=C1)C1=C(OCC(=O)NC)C=CC=C1	74.7	53.5667	3.25167	1.9	81.7	> 12.5	57.7	3.66	86.1	#N/A	#N/A
DDD01027501	O=S(=O)(NCC(N1CCCCCC1)c1ccsc1)c1cccs1	85.5	49.6667	4.54459	1.94	83.7	> 12.5	44	8.75	86.1	7.79	69.9
DDD01029520	C(N1CCC2(C1)CCCN(Cc1ccccn1)C2)c1cccs1	73.8	56.5	7.50267	1.97	83.5	6.38	51.8	2.96	86.9	> 4.16	58
DDD01056665	CN(C)CCn1nc(C2CCN(Cc3ccccc3)C2)c2cccnc12	71.9	56	5.02693	1.99	70.9
DDD01256872	CC(C)(C)c1nccc(n1)C1(CCNCC1)c1ccccc1Cl	76.1	66.5667	1.24231	2.03	78.8	5.56	91.9	1.22	98.3	1.71	74.4
DDD01066100	CCC(CNC(=O)CNC(C)=O)Oc1cccc(F)c1	85	50.8333	8.81608	2.09	83.9	6.31	55.6	2.15	83.4	#N/A	#N/A
DDD01258327	CCn1ccnc1CN1CCCC(CO)(Cc2cccc(Cl)c2)C1	76.8	59.7	1.4	2.14	81.2	> 12.5	38.3	2.68	82.9	3.02	58.2
DDD01252814	Cc1nc(c[nH]1)-c1cc2CC(CN)Oc2c(Cl)c1	83.7	58.7667	0.90185	2.18	88.7
DDD01076635	CC(C)N1CCC(CC1)NC(=O)Nc1cc(C)cc2cccnc12	79.7	58.3	5.05866	2.21	80.6	> 12.5	47.1	5.47	86.3	5.3	53.2
DDD01252287	O=C(C1CNCCO1)N1CCCC(C1)(c1ccccc1)c1ccccc1	79.5	47.9667	13.482	2.21	80.7	6.95	53.2	2.05	83.1	5.76	58.4
DDD01035644	Brc1ccc2ccn(CC(=O)NC[C@@H]3CCCN4CCCC[C@H]34)c2c1	79.3	55.4	10.0583	2.57	81.8
DDD01258121	CCC1CN(CCN1C(C)C)C(=O)c1ccc(Cl)cc1O	73.3	49.1667	2.11975	2.57	80.5
DDD01060989	CCCOc1ccccc1CN[C@@H]1CCC[C@H]1Cc1cc(C)no1	84.9	53	4.11461	2.71	79.8
DDD01062848	Cn1ccnc1C(O)(CCNCc1ccc(Cl)o1)C(F)(F)F	71.1	53.6333	8.01332	2.81	78.7
DDD01057375	COc1cc(C(=O)NCC2(CCN(C)CC2)N(C)C)c2ccccc2n1	73.6	89.2333	4.79618	< 2.32E-03	88.6	> 12.5	53	0.00714	87.3	> 1.39	63.6
DDD01250308	CCCN1CCC(CC1)Nc1ccc(OC)c(OC)c1	92.4	60.2667	22.2893
DDD01079164	CN1CCC(CC1)NCC(O)c1cccc(OCc2ccccc2)c1	90.7	55.4667	9.44052
DDD01298810	Cc1cnn(CC2CCCN2Cc2nc(C)c3ccccc3n2)c1	78	53.1667	9.14895
DDD01075738	N#Cc1ccc(CNCC2(CCOCC2)c2ccccc2)cc1	83	53.1333	28.75
DDD01059925	CN1CCCCC1c1ncc2CN(CCCc3ccccc3)CCc2n1	89.2	52.7	5.52449
DDD01078803	CS(=O)(=O)CCCNC1(CCC1)c1ccc(Br)cc1	78.5	51.9333	5.77437
DDD01035551	CNC(C)Cc1ccccc1Sc1ccc(O)cc1	88.2	51.7667	18.6656
DDD01254274	Cc1nn(C)c(Oc2ccc(Cl)cc2)c1CN1CCC(CN)C1	92.8	51.3333	9.33613
DDD01075736	COc1ccccc1C1(CNCc2ccc(cc2)C#N)CCOCC1	76.6	51.3	9.69072
DDD01257998	N#CC1CCCN(C1)c1nc(nc2CCNCCc12)-c1ccccc1	79.9	51.0333	6.47637
DDD01028727	CO[C@H]1CCN(C[C@@H]1Cc1ccccc1)C1CCOCC1	78.7	50.6	3.39559
DDD01247801	COc1cccc(CN2CCC(CO)(Cc3ccc(Cl)cc3)CC2)c1O	89.5	50.1667	4.77214
DDD01078067	CCOCCN1CCN(CC(O)c2cc(Cl)ccc2Cl)CC1	78.5	50	5.3507
DDD01252887	Cn1cc(CN2CCCC(CCc3c(F)cccc3F)C2)cn1	79.3	49.9667	12.977
DDD01063209	CN1CCC(CC1)N(Cc1ccco1)S(=O)(=O)c1cc(Br)ccc1Br	76.2	49.9667	3.26241
DDD01061771	CN1CCN(CC1)C1=C(CNC(=O)CC2=C(F)C=CC=C2)C=CC=C1	77	49.8333	3.35311
DDD01036932	CO[C@H]1CCN(Cc2cccc(C)n2)[C@@H]2CN(Cc3cccnc3)C[C@H]12	70.4	49.8333	3.12143
DDD01080862	NC(=O)C1CN(CCO1)C(=O)NC1=CC(Cl)=CC(Cl)=C1	84.9	49.5667	27.9316
DDD01060978	CCCN(Cc1cccnc1)C1CC(C)(C)NC(C)(C)C1	77.6	49.5333	4.13078
DDD01253471	CN(C)CC1(O)CCCN(C1)c1cc(C)nc2cc3OCOc3cc12	80.2	49.1	11.5547
DDD01030272	CC(C)N1[C@H](CN2CCCC2)C[C@@H]2CN(Cc3ccoc3)CC[C@H]12	76.2	49.0667	1.77858
DDD01076838	COc1ccc(cc1)C(NCc1cccc(O)c1)C1CC1	83.6	48.9	2.59422
DDD01072442	CCc1ccc(CNCC2CCN(CCO)CC2)cc1	84.2	48.8	4.50333
DDD01081966	Cc1cccc(CNC2CC3(CCN(CCO)CC3)c3ccccc23)n1	78.6	48.6667	5.16269
DDD01026445	NCCC(Cc1ccccc1)c1ccco1	84.1	48.4333	11.8732
DDD01247233	CC(C)C1CN(CCCN1CC1CC1)c1cccc(n1)C#N	84.3	48.4	7.8543
DDD01251890	CC(NC1CCCC1)c1ccccc1-n1cccn1	81	48.3333	4.07962
DDD01059789	CC1CCN(CCNCc2cc(cn3nnnc23)-c2ccccc2)CC1	70.1	47.9667	4.41059
DDD01244575	C1CCC(C1)c1nc2CCNCCc2c(n1)N1CCN2CCCC2C1	77.4	47.8667	6.47791
DDD01059074	Cc1ccc(cc1)C1(CN2CCN(Cc3cncn3C)CC2)CC1	73.2	47.8333	5.91383
DDD01061229	Cc1ccc(CN(Cc2cccc(C)n2)C2CC(C)(C)NC(C)(C)C2)o1	77.4	47.6333	7.97392
DDD01257340	COc1ccccc1OCCCN(C)c1cc(C)nc(N)n1	73.5	47.4	9.84733
DDD01071519	COc1ccccc1CN(C)C(=O)CN1CC(C1)n1nc(C)cc1C	78.2	47.3	7.502
DDD01255927	CCOc1ccc(CNCC(O)c2ccccc2)cc1Cl	89.4	47.2333	8.56407
DDD01246657	CN(C)C[C@@H]1CN(C[C@@H]1CO)C1CCN(CC1)c1ccccc1Cl	74	47.2	2.84781
DDD01074324	Cc1ccccc1C1(CN)CCCCC1	91	47.1333	5.16269
DDD01060040	NCCn1nc(C2CCN(Cc3ccccc3Cl)C2)c2nccnc12	80.1	47.1	0.953939
DDD01057796	CCCn1nc(C)c(c1C)-c1cncn1CC1(CCC(C)CC1)N(C)C	70.3	47.0667	19.1106
DDD01075172	Cc1ccc(CNCc2cccc3cn[nH]c23)c(OC2CCOC2)c1	78.7	46.8667	9.39273
DDD01025849	CCC1CN(CC(=O)NCCN(CC)CC)c2ccccc2S1	76.7	46.7667	1.07858
DDD01256624	CC(C)N1CCC(CC1)NC(C)c1cnn(c1C)-c1ccc(F)cc1F	79.9	46.3333	5.18588
DDD01243907	CCn1cc(CN2CCCC(COc3ccc(F)cc3)C2)cn1	75.5	46.3	12.6349
DDD01032950	Cc1nnc(s1)N1CC[C@@H](OCC2CC2)[C@@H](Cc2ccccc2)C1	84.8	46.2667	2.89885
DDD01080053	CCOc1cccc(c1)C(C)NCc1ccc(OC)c(OC)c1OC	77.6	46.0667	8.98462
DDD01297162	CC1CCCN(CCNC(=O)C2(CCOCC2)c2ccccc2C)C1	88.1	45.9667	12.5898
DDD01057493	CC(N1CCC(CC1)NC(=O)CN1CCC(C)CC1)c1ccccc1	84.3	45.8	1.90788
DDD01057046	Fc1ccccc1-c1cccc(n1)C1CCCN(C1)C1CCOCC1	82.3	45.7	6.10246
DDD01062806	Cc1ccc(CNCCC(O)(c2nccn2C)C(F)(F)F)o1	73.2	45.7	4.51774
DDD01248198	CNc1cc(C)nc(NCc2cc(C)cc3c(C)c(C)[nH]c23)n1	92	45.6667	26.1515
DDD01245296	N[C@H]1CN(CCCOc2ccccc2)C[C@@H]1C1CC1	86.8	45.6667	3.16596
DDD01252385	Cn1cc(CN2CCCC(CCc3ccc(F)c(F)c3)C2)cn1	71.2	45.6	12.9688
DDD01056825	Cc1cnc(Nc2cccc(n2)C2CCCN2Cc2cn(C)nc2C)s1	89.8	45.6	6.79117
DDD01056697	Nc1ncc(-c2ccc(cc2)C(F)(F)F)c(n1)C1CCCNC1	70.9	45.6	5.00899
DDD01080694	CC(CNS(=O)(=O)c1cccc(C)c1Cl)N1CCN(C)CC1	81.5	45.5667	2.34379
DDD01244907	CNc1nc(C)cc(NCc2cc(C)cc3c(C)c(C)[nH]c23)n1	92.7	45.5	4.91223
DDD01032485	CN(C)CCNC(=O)C1Cc2nc(sc2N1CC1CC1)-c1ccccc1	89.7	45.3	4.3715
DDD01057241	Cn1cc(CN2CCN(CC3(CC3)c3ccccc3)CC2)cn1	78.9	44.9667	4.69716
DDD01248160	CN(C)CCCn1ccnc1C1CCCN(C1)c1ncc(Cl)cc1F	84.4	44.9333	4.72476
DDD01060653	Cc1cc(C)c2cc(CNCc3ccco3)c3nn(C)c(=O)n3c2c1	75.5	44.8667	1.40475
DDD01072714	CCN(C(C)c1cccc(O)c1)S(=O)(=O)c1cccnc1	76.6	44.8	7.95676
DDD01243728	COCCN(Cc1ccccc1Cl)c1nc(CCN)nc2ccccc12	89.5	44.6	16.7269
DDD01070262	CCC(=O)NCC(=O)NCC(C)(C)c1cccc(Br)c1	87.2	44.5667	10.7342
DDD01028934	Clc1ccc(cc1)S(=O)(=O)N1C[C@@H]2CCN[C@@H]2C1	82	44.5	5.30754
DDD01249089	N[C@H]1CN(CCOc2ccc(F)cc2)C[C@@H]1C1CC1	76.5	44.4667	7.19745
DDD01068385	CCC(=O)NCC(=O)NC(Cc1ccccc1)c1sccc1C	85.5	44.4333	14.6766
DDD01058939	CC(C)(C)C(=O)N1C[C@@H]([C@H]2CN(CC[C@@H]12)C1CCCC1)c1ccsc1	72.6	44.1333	2.25462
DDD01083119	C(N1CCC2(CC(CO2)Nc2nccs2)CC1)c1ccccn1	75	43.9667	0.907377
DDD01085356	CN(C)CC(=O)N1C[C@H]2CCC[C@@]2(COc2ccccn2)C1	84.9	43.9333	8.82968
DDD01247714	CN(Cc1nc2ccc(C)c(C)c2[nH]1)Cc1n[nH]c2CCCCCc12	85.8	43.8667	5.28804
DDD01081380	Fc1ccc2C(CC3(CCNCC3)c2c1)NC1CC1	83	43.8667	1.861
DDD01062253	CC(NCC1(CCOCC1)N(C)C)c1ccc(Cl)cc1	74.6	43.7833	10.9868
DDD01057912	Cc1cccc(Cc2cc(C)nc(c2)C2CCCNC2)c1	80.1	43.6333	3.32916
DDD01250407	CN1CCCc2c(N)c3CCCCc3nc12	75.8	43.5667	19.424
DDD01060400	CC(C)(N)C(=O)N1CCCC1c1cncc(Oc2ccccc2)n1	78.6	43.5333	3.88887
DDD01036142	CCOc1ccc(Cl)cc1C1CCCN1	87.7	43.5333	3.49333
DDD01030417	Fc1ccc2C(CC3(CCNCC3)c2c1)OCC1CC1	70.1	43.5	8.90169
DDD01057370	CCC(CN1CCCC1)NC(=O)C1(CC1)c1cccc(F)c1	84.7	43.4	5.85064
DDD01034121	CC(C)N1CCC2(CC1)CC(NCc1ccccn1)c1ccccc1O2	70.7	43.3	7.88099
DDD01070268	COC(=O)NCC(=O)NCC(C)(C)c1cccc(Br)c1	84.6	43.2667	11.566
DDD01254026	CCn1cc(cn1)C1=CCN(CCCOc2ccccc2)CC1	82	42.8333	10.9441
DDD01253813	Cc1nc(cs1)-c1cccc(c1)N1CCC(CC1)N1CCCC1	71.6	42.7333	10.0321
DDD01078049	CCN1CCN(CC(O)C2=C(Cl)C=CC(Cl)=C2)CC1	77	42.6333	5.058
DDD01031321	CN(C)C1CC2(CCN(CCO)CC2)c2ccc(C)cc12	74.8	42.5667	5.31068
DDD01248855	Cc1nc2CCNCCc2c(NCc2cc3ccccc3s2)n1	89.2	42.4333	9.12707
DDD01248472	COc1cccc(c1)S(=O)(=O)N1C[C@@H](C(C)C)[C@@H](C1)N(C)C	72.2	42.4333	6.62143
DDD01034885	CCOc1c(Cl)cc(Cl)cc1CNCCCn1ccnc1	75.9	42.3333	15.3053
DDD01301539	COc1cccc(c1)-c1nc(CNCCCn2cccn2)cs1	76.3	42.3	5.01199
DDD01257772	COc1ccccc1C1CNC(=O)c2nc([nH]c2C1)-c1ncc[nH]1	89.1	42.2667	12.5189
DDD01026143	O=C(NCCN1CCCCC1)C(N1CCCC1)c1ccccc1	80	42.1333	11.1393
DDD01031612	Cc1ccc(CN2CCC3(CCN(Cc4ccncc4)CC3)CC2)cc1	78.3	42.1333	2.53246
DDD01030493	COCCN(C)C[C@@H]1CCC[C@@H]2CN(Cc3ccc(OC)nc3)C[C@H]12	79.6	42.1	5.47814
DDD01074612	COc1ccccc1CNC(C)c1ccc(cc1)-n1ccnc1	78.4	41.9333	4.08207
DDD01069782	Cc1cccc(CNC2CCN(CCc3ccncc3)CC2)c1C	76.3	41.8	9.70412
DDD01246491	CC1(CCCN(Cc2cncn2C2CCCC2)C1)c1ccccc1	91	41.7	10.4456
DDD01250696	CCCc1nc(N(C)CCN2CCCCCC2)c2cnn(C)c2n1	92.9	41.7	2.1
DDD01252213	Cc1cc(on1)-c1cc(c(C)s1)S(=O)(=O)N1C[C@H](N)[C@H](C1)C1CC1	71.2	41.5	4.24382
DDD01081087	CCCN1CCC(CC1)NC(=O)c1ccc(F)cc1I	71.1	41.2	4.55082
DDD01081921	CO[C@@H]1CCN(Cc2ccoc2)C[C@@H]1Cc1ccc(OC)cc1	75.1	41.2	12.5008
DDD01253888	Cc1sc2nc(CCN)nc(N3CCC(CC3)N3CCCC3)c2c1C	84.3	41.1	3.25115
DDD01244614	NCC1CCCN(C1)c1nc(nc2CCNCCc12)-c1ccccc1	85.9	41.0333	19.1265
DDD01249659	CC(Nc1nc(nc2CNCCc12)-c1ccncc1)c1ccccc1	71.5	41.0333	7.35278
DDD01027663	Cc1cc(CN2CCC(CNS(=O)(=O)c3ccc(C)s3)CC2)c(C)o1	87.7	40.9	6.11474
DDD01028924	Clc1cccc(c1)S(=O)(=O)N1C[C@@H]2CCN[C@@H]2C1	88.1	40.8667	15.6564
DDD01030465	COc1ccc(CN2C[C@H]3CCC[C@@H](CN(C)C4CC4)[C@H]3C2)cn1	78.2	40.8667	10.0729
DDD01062784	CC(NC1(CNS(=O)(=O)N(C)C)CCCC1)c1ccccc1	78.7	40.8667	1.72434
DDD01032044	Cc1ccc2CN(CC3CC3)CCN(CCn3cccn3)c2n1	77.6	40.8	12.7389
DDD01032133	CN(C)CCN1CCN(Cc2cccs2)Cc2cccnc12	77.1	40.7667	4.15251
DDD01034891	Cc1nc(Nc2ccc(Cl)cn2)sc1C(=O)NCCCN1CCCCC1	81.4	40.6333	8.80473
DDD01025889	CCN(CC)CCNC(=O)c1ccc(s1)-n1ccc2ccccc12	90.5	40.5667	5.41233
DDD01085299	C(N1CCOCC2(CCN(C2)C2CCOCC2)C1)c1ccccc1	82.2	40.5	9.16897
DDD01084199	COc1ccc(CN2CCC3(C2)CCCN(C3)c2ncc(F)cn2)cc1	87.1	40.3667	13.027
DDD01061830	Cc1c(CNC2CCN(C2)c2ccccc2OC(F)F)cnn1C	71	40.3	3.07896
DDD01068218	CN(C)C1CN(c2ccccc2C1)S(=O)(=O)c1cccc(c1)C#N	76.6	40.2667	8.23549
DDD01258115	CCn1ccnc1CN(C)C1CCCN(CCc2ccccc2)C1	77.1	40.2333	8.82175
DDD01034883	CCOc1cc(CNCCCn2ccnc2)cc(Cl)c1OCC	77.3	40.0667	3.44432
DDD01061767	CN1CCN(CC1)C1=C(CNC(=O)CC2=CC(F)=CC=C2)C=CC=C1	77.4	39.8	6.91592
DDD01250087	CCN(C)C[C@@H]1CN(Cc2cccc(Cl)c2)C[C@@H]1CO	83.6	39.7	0.43589
DDD01057887	CC(C)N1CCCC1c1nc(ncc1I)N(C)C	70.7	39.5667	8.71569
DDD01034385	N#Cc1cccc(CN2CCn3cc(Cn4cccn4)nc3C2)c1	78.6	39.4333	7.68657
DDD01247310	Cc1cc(c(C)s1)S(=O)(=O)N1C[C@H](N)[C@H](C1)C1CC1	86.1	39.4	8.55102
DDD01075775	CS(=O)(=O)CCCNCc1c(Cl)cccc1N1CCCC1	72	39.3667	5.48483
DDD01080013	Cc1ccc(CNC2CCN(CCc3ccncc3)CC2)cc1C	86.9	39.3667	3.57957
DDD01075803	CC(C)OCCN(C)CC(N1CCOCC1)c1cccs1	79.9	39.2	5.63471
DDD01057830	COc1ccc(CN(Cc2cncn2C)Cc2ccccn2)cc1	70.1	39.1333	8.73632
DDD01071431	CC(CNS(=O)(=O)c1cccc(Cl)c1)N1CCN(C)CC1	78	39.1	14.4648
DDD01028731	CO[C@@H]1CCN(C[C@@H]1Cc1ccccc1)C1CCOCC1	80.8	38.8333	5.18298
DDD01031593	Cc1nc(COC[C@@]23CCC[C@@H]2CN(Cc2cccc(C)n2)C3)cs1	82	38.8333	4.57639
DDD01245740	CCC(C)Oc1ccc(CNCCc2c[nH]cn2)cc1Cl	91.9	38.7333	16.8871
DDD01060674	COc1cc(CN(CCCN(C)C)Cc2ccccn2)cc2OCOc12	80.6	38.7333	6.58357
DDD01295772	Cc1noc(Cl)c1CCC(=O)N1CCN(CC1)c1cccc(C)c1	86.3	38.4667	7.4144
DDD01058849	Cc1cc(CN2CCc3nc(nc(O)c3CC2)N2CCOCC2)c(C)s1	77.6	38.2	10.0817
DDD01035766	O=C(NCCCN1CCCCC1)c1ccc(s1)-n1ccc2ccccc12	79	38.1333	15.7408
DDD01079495	Cc1nnc(NC(=O)CN2CCCC(C2)c2ccn[nH]2)s1	85.8	38.1	32.4032
DDD01080712	CN(Cc1cccc(F)c1)C(=O)CN1CCCC1CCc1ccccc1	75	37.9	4.71275
DDD01056928	CC(C)NC(=O)C1(Cc2ccccc2-c2ccccc2)CCCNC1	76.7	37.8	4.7655
DDD01295548	Clc1ccccc1CCN1CCN(CC1)c1ccc2nncn2n1	74.9	37.7333	6.08714
DDD01072445	OCCN1CCC(CNCC2=CC=C(C=C2)N2CCCCC2)CC1	91.9	37.6667	11.2696
DDD01078603	CC(C)N(CCNC(=O)c1[nH]nc2ccc(I)cc12)C(C)C	86.9	37.6333	11.5889
DDD01299082	CC(C)c1ncc2CCN(CCCc3nc4ccccc4o3)Cc2n1	70.3	37.5667	13.3665
DDD01056785	C(Cc1ccccc1)N1CCCC1c1cccc(Nc2nccs2)n1	77	37.5	15.0702
DDD01082739	C(Nc1ccccn1)[C@@H]1CCC[C@@H]2CN(C[C@H]12)c1ncccn1	72.9	37.4667	1.98578
DDD01030601	CN1CCn2c(cnc2C11CCN(CC2CC2)CC1)-c1ccccc1	80.9	37.3667	15.439
DDD01056626	O[C@@H]1C[C@H]2CN(Cc3ccsc3)[C@@H](Cc3ccccc3)CN2C1	71.6	37.2	17.2035
DDD01037966	CCN(CC)c1nc(Nc2cccc(c2)C(C)O)nc2ccccc12	84.5	37.1667	17.2396
DDD01057979	Cc1cc(Cc2ccccc2C)cc(n1)C1CCCNC1	78.9	37.1667	5.36687
DDD01057240	CCC(CN1CCN(C)CC1)NC(=O)C1(CC1)c1cccc(F)c1	77.1	37.0667	7.8526
DDD01253116	OC1(CNCC2CCCCC2)CCCN(Cc2cccc(F)c2F)C1=O	74.4	37.0667	7.61665
DDD01027721	Cn1cccc1C(CNC(=O)COc1ccc(Cl)cc1Cl)N1CCCC1	74.3	37.0333	9.16642
DDD01065359	CC(C)c1nccn1CC1CCCN1Cc1nc(C)c2ccccc2n1	77.3	36.9333	17.7218
DDD01072980	O=C(N(CC1=CC=CO1)C1CCCC1)C1=CNC2=C1C=CC=N2	86.9	36.8	17.7685
DDD01037133	Fc1cccc(c1)N1CCCC2(C1)CN(CCO2)c1ncccn1	70.6	36.7667	2.63122
DDD01255181	CN(C)CCN1CC2(CCCN(C2)c2ncc(Cl)cc2F)CCC1=O	82.8	36.7333	3.53883
DDD01252522	C(C1CCC1)N1C[C@@H]2CC[C@H]1CN(Cc1cc(no1)-c1ccccc1)C2	88.4	36.6333	10.6251
DDD01029156	COc1ccc(C[C@H]2CNCC[C@@H]2OCC2CC2)cc1	82.2	36.4333	3.41516
DDD01253184	CC(N)c1cnn(c1C)-c1cccc2ccccc12	74.5	36.3667	7.73132
DDD01247444	Cc1ccc(OCc2occc2C(=O)N2CCCCC(N)C2)cc1	77.5	36.3	10.499
DDD01244929	CC1=C(CCN2C[C@H](O)[C@H](C2)N2CCOCC2)C(C)(C)CCC1	78.3	36.0667	21.2185
DDD01081390	C1CCC(C1)NC1CC2(CCNCC2)c2ccccc12	75.7	36	10.5057
DDD01082414	CN1CCCN(CC1)C(=O)c1ccnn1-c1ccc2ccccn12	70.8	35.9	8.06722
DDD01029412	Fc1ccc(CN2CCC3(CCC(=O)N3CCN3CCCC3)CC2)cc1	84.6	35.8333	12.1533
DDD01073490	C(N1CCCC(C1)c1ccn[nH]1)c1cn2ccccc2n1	89.1	35.8333	7.41912
DDD01072539	CCC(CNC1CCN(CC1)C(=O)N(C)C)Oc1ccccc1C	73.2	35.8	3.89744
DDD01073293	Cc1cn2CCCC(CNCc3cccc4OCOc34)c2n1	82.1	35.7	13.0572
DDD01244720	Cc1ccc(C)c(c1)N1CCN(CC2(O)CCNC2)CC1	85.9	35.7	3.91535
DDD01025337	FC(F)(F)c1ccc2nc([nH]c2c1)[C@H]1CCN(C1)C1CCCCC1	83.6	35.5333	22.2298
DDD01070675	CN1CCN(Cc2ccccc2CNC(=O)c2ccc(Cl)cc2F)CC1	77.2	35.5333	8.76375
DDD01084421	Cc1cccc(CN2CCOCC3(CCN(C3)C3CCOCC3)C2)c1	78.6	35.5333	5.51029
DDD01032837	CN1CCN(C[C@H]2OC[C@@H]3CCN(Cc4ccsc4)C[C@H]23)CC1	77.7	35.4	15.1555
DDD01068727	FC(F)(F)c1cccc(n1)N1CCC(CC1)C(=O)NC1CC1	79.4	35.3667	16.6212
DDD01248149	Cc1cc(ccn1)N1CCCN(CCc2ccccc2)CC1	87	35.3667	11.9876
DDD01060106	OCCN1CCC(CC1)c1cncc(n1)-c1cccc(Cl)c1	71.1	35.2	4.7571
DDD01248542	Cc1nc(CN)cc(n1)N1CCC(O)(CC1)c1ccc(Cl)cc1	72.2	35.1667	15.1335
DDD01084446	CN(Cc1ccco1)[C@@H]1CN(Cc2ccsc2)C[C@@H]2CCCO[C@H]12	76	34.9667	16.1017
DDD01251605	CN(Cc1ccccc1)c1ncccc1CNC1CCC1	71.1	34.9667	6.88573
DDD01297161	CC1CCN(CCNC(=O)C2(CCOCC2)c2ccccc2C)CC1	85.3	34.8333	9.72899
DDD01058290	COc1ccc(CNC(Cc2ccsc2)c2ncccc2C)cc1OC	74.7	34.8333	3.3828
DDD01057889	CC(C)N1CCCCC1c1nc(ncc1I)N(C)C	72	34.8	6.02578
DDD01246316	C[C@@H]1CN(CC[C@]1(C)O)C1CCN(CC1)c1ccccc1F	87.7	34.7333	13.0216
DDD01072713	CC(N(C)S(=O)(=O)c1cccnc1)c1cccc(O)c1	71.4	34.7	4.67761
DDD01057977	Cc1cc(Cc2ccc(F)cc2)cc(n1)C1CCCNC1	73.9	34.5333	8.60484
DDD01026592	CC1=CC(NCCN)=NC(=N1)C1=C(O)C=CC=C1	79.2	34.4667	15.8828
DDD01247009	Clc1ccccc1-c1cc(CNc2ncnc3CCNCCc23)no1	80.3	34.3333	11.8035
DDD01057623	CN(C)c1cc(C)nc(c1)C1CCN(C1)S(=O)(=O)c1cccs1	84.1	34.1	8.23468
DDD01029104	CN(C)CCN1C(=O)CCCC11CCCN(Cc2cccs2)C1	73.5	34.0667	1.65025
DDD01246282	CCC[C@H]1CN(C[C@@H]1N)S(=O)(=O)c1ccc(CC)s1	75.8	33.9667	6.05833
DDD01030982	CN(CC1CC11CCN(Cc2ccc(C)o2)CC1)Cc1cccnc1	70.8	33.9333	9.67178
DDD01025002	O[C@H]1CC(CNCc2ccc(Cl)cc2)(COc2cccnc2)C[C@H]1O	70.3	33.8667	17.587
DDD01036223	C(N1CCC2(C1)CCCN(C2)c1ccccn1)c1cccs1	73.4	33.8	11.6863
DDD01254837	C(N1CCC2(C1)CCCNC2)c1ccccc1Cn1cccn1	85	33.8	1.57162
DDD01235800	CNCC[C@H]1CC(C)(C)Oc2ccc(OC)cc12	73.8	33.7667	11.1545
DDD01297836	Fc1cc(NC(=O)NCCCOCC2CC2)ccc1-n1cncn1	88.3	33.6	16.1465
DDD01256245	CCc1ccccc1OCCN(C)C(=O)CN1CCCC1	75.4	33.5333	13.7384
DDD01249608	CCc1nccn1CCNC1CCN(CC1)c1nc2ccc(Cl)cc2s1	85.7	33.5333	3.85919
DDD01071393	CC(C)(C)c1nc(CNC2CCCN(C2)c2cccnn2)no1	83	33.5	7.10845
DDD01254491	NCC(=O)N1CCCCC1c1ccc(F)cc1	85.3	33.5	6.61211
DDD01076340	CN(CCOc1ccccc1F)c1cc(C)nc(N)n1	85.3	33.3667	10.2011
DDD01031310	C([C@H]1OC[C@@H]2CCN(Cc3ccc4OCOc4c3)C[C@H]12)N1CCCC1	78.6	33.3667	5.32666
DDD01295295	CCC1CCCCN1Cc1ncc(o1)C(C)(C)C	71.2	33.3	1.12694
DDD01298408	Cc1cnn(CCNCC(O)COc2c(Cl)cccc2Cl)c1	81.9	33.1333	4.2395
DDD01247061	OC1(CNCc2ccc(F)cc2)CCCN(CCc2ccccc2)C1=O	78.1	33.1	16.962
DDD01253468	CC(C)=CCN1CCC2(CN(Cc3cc(F)cc(F)c3)C(=O)C2)CC1	75	33.1	10.6127
DDD01031402	C(N1CCC2(CCc3cc(ccc23)-c2cccnc2)CC1)c1ccco1	73.9	33.0667	8.91142
DDD01253319	CCn1cc(CN2CCCC(COc3ccccc3F)C2)cn1	72.7	33.0667	7.98269
DDD01081378	Cc1ccc2C(CC3(CCNCC3)c2c1)NC1CC1	74.6	33	13.9861
DDD01302853	CC(O)CN1CCC(CNCc2ccccc2Br)CC1	78	33	10.024
DDD01036335	CC(C)c1ccc(CN2CCC3(C2)CCCN(C3)c2nncs2)cc1	73.6	32.9667	7.8015
DDD01061692	CN(CCCOC1=CC=CC=C1)C(=O)C1=CSC(=N1)C1=NN=CN1	77.1	32.8	5.04678
DDD01057062	CN(C)CCCN(Cc1ccco1)Cc1c(C)nc2sccn12	86.2	32.7	6.69104
DDD01296686	COc1cc(CNCC(O)c2ccc(C)cc2)cc2OCOc12	74	32.7	5.90931
DDD01038800	CCN1CCN(CC1)S(=O)(=O)c1cc(Cl)c(Cl)cc1C	70.9	32.6667	10.6105
DDD01084411	Fc1cccc(CN2CCOCC3(CCN(C3)C3CCOCC3)C2)c1	78.2	32.6333	11.698
DDD01059114	CN(C)Cc1cc(nn1C)C1CCCCN1S(=O)(=O)c1cccc(Cl)c1	78.8	32.0333	0.585947
DDD00104039	COc1ccc(CC(=O)N2CCC[C@@H](N)[C@@H]2c2ccccc2F)cc1	80.9	32	3.68646
DDD01254424	CN(C)[C@H]1CCCCN(C1)C(=O)c1cccc(c1)-c1cccc(F)c1	73.3	31.9333	6.90024
DDD01255014	Clc1cccc(c1)C1CCN(C1)c1ncnc2CNCCc12	79.6	31.8	5.36936
DDD01256929	C(Cc1nc2CCCc2s1)Nc1nc(nc2CCNCCc12)C1CC1	78.5	31.7667	6.06658
DDD01025014	Cc1ccc(cc1)-c1cn2C[C@H](CNCc3nccn3C)OCc2n1	87.4	31.7333	15.0533
DDD01029041	Cc1ccc(CN2CCC3(CCN(C3)S(=O)(=O)c3ccccc3)C2)o1	79.6	31.6667	9.85207
DDD01245517	CCn1ccnc1CN(C)C1CCCN(CCCc2ccccc2)C1	86.8	31.6667	8.10514
DDD01059914	COc1ccccc1CN1CCC(C1)c1nn(CCN)c2nccnc12	75.5	31.6667	0.152753
DDD01250035	NCC1Cc2cc(Cl)cc(c2O1)-c1cncc(n1)C(=O)N1CCCCC1	76	31.6333	9.12707
DDD01026700	CCCC1=NC2=C(C(C)=C(C)N2CCN(C)C)C(N)=C1CC	89.9	31.58	29.599
DDD01246654	COc1ccnc(CN2CCCC(CCc3ccc(F)cc3)C2)c1OC	88.9	31.5333	16.7828
DDD01057558	CN(C)[C@@H]1CN(Cc2cccnc2)C[C@H]1c1cn(C)c2ccccc12	71.9	31.4667	4.37302
DDD01062930	Clc1cc(Cl)cc(CN2CCC(CC2)NCc2ncc[nH]2)c1	84.7	31.45	20.4776
DDD01036152	NCC1[C@@H]2CN(CCc3ccccc3)C[C@H]12	86.8	31.4	7.56241
DDD01235826	CNCC[C@H]1CC(C)(C)Oc2ccc(OCC3CC3)cc12	76.1	31.1667	3.25167
DDD01253426	CN(C)Cc1cc(nc(C)n1)N1CCCC(COc2ccc(F)cc2)C1	86.4	31.1333	14.9527
DDD01069722	Clc1cccc(CNC2CCN(CCc3ccncc3)CC2)c1	92.3	31.1	10.7373
DDD01084603	COCC1CC2(CN1C(C)C)CCN(Cc1ccoc1)CC2	71.6	31.0667	6.78847
DDD01057232	Cc1nn(C=C)cc1CN1CCN(CC2(CC2)c2ccccc2)CC1	72.4	31.0333	13.2851
DDD01059917	COc1cccc(CN2CCC(C2)c2nn(CCN)c3nccnc23)c1	89.1	30.9667	11.2117
DDD01056741	COc1cccc(CN(Cc2ccco2)Cc2[nH]cnc2C)c1	86.4	30.9333	7.73908
DDD01249527	Cc1nc2CCNCCc2c(NC2CCN(Cc3ccccc3)CC2)n1	78.7	30.9333	2.73008
DDD01060263	CN(C)CC1COc2ccc(C)cc2CN1C(=O)c1cccs1	77.3	30.7667	8.1304
DDD01256547	COc1cc(F)ccc1C(N(C)CCN1CCCC1)C(O)=O	72.3	30.7333	1.92959
DDD01244435	Cc1[nH]c2ccc(CNC3CCN(Cc4ccccn4)CC3)cc2c1C	93.6	30.7	15.2434
DDD01056807	Cc1cc(nc(N)n1)N1CCOC(C1)c1ccccn1	75.1	30.6333	8.25914
DDD01063507	CC(C)[C@H](N)C(=O)N1CCSc2ccccc2C1	73.7	30.1667	10.8694
DDD01246676	COc1ccccc1-c1ncc(CN2CCCC[C@@H](C2)N(C)C)s1	70.3	30.1333	14.0215
DDD01301580	CC1CN(CC2CCCC2)CCN1C1=NN2C=NN=C2C=C1	70.4	29.9667	8.5804
DDD01068814	ClC1=CN=C(NC(=O)C2CCCN(CCC3=CC=NC=C3)C2)C=C1	71.9	29.9667	7.15006
DDD01063644	CCC(O)(CNCc1cc[nH]n1)c1ccc(Br)cc1	76.4	29.7667	1.00167
DDD01256765	COc1cnc(nc1-c1ccnn1C)N1CC(C1)N1CCOCC1	75.3	29.5667	7.32143
DDD01249039	FC(F)Oc1ccccc1CN1CCCC(C1)c1nccn1CC1CC1	86.4	29.4333	12.0384
DDD01257100	CN1CC(CC2(CCN(Cc3ncc[nH]3)CC2)C1)c1ccccc1	82.5	29.4	1.67033
DDD01245646	OC1(CNCC2CCCCC2)CCCN(CCCc2ccccc2)C1=O	72.4	29.3333	8.16966
DDD01084539	COCC1CC2(CN1C(C)C)CCN(Cc1cccc(c1)C#N)CC2	73.2	29.2333	9.54481
DDD01300473	CCNC(=O)C(C)NC(=O)c1cnc(s1)-c1ccc(C)cc1C	71.5	29.2	10.3677
DDD01034403	OCCN1CCC2(CC1)COc1ccccc1S(=O)(=O)N(CC1CC1)C2	76.9	29.1333	16.9801
DDD01244496	Cc1nc(CN2CCCC(CCc3ccc(F)c(F)c3)C2)c[nH]1	81.9	28.8667	11.3298
DDD01296681	COc1cc(CNCC(O)c2ccccc2F)cc2OCOc12	78	28.8333	6.00777
DDD01057419	Fc1ccc(CN2CCCC(C2)c2cc3ncccc3[nH]2)cc1	82.3	28.7	12.5284
DDD01084187	Fc1cnc(nc1)N1CCCC2(CCN(Cc3ccco3)C2)C1	78.2	28.6667	10.152
DDD01057987	Cc1cc(Cc2ccccc2)cc(n1)C1CCCNC1	76.1	28.6667	8.11008
DDD01063314	CCOc1ccc2ccccc2c1CNCC1CCS(=O)(=O)C1	74.9	28.6333	13.9751
DDD01029754	Cn1cc(CNC2CC3(CCN(CC4CC4)CC3)c3ccccc23)cn1	87.6	28.6	2.60576
DDD01029512	Cc1noc(C)c1CN1CCCC2(CCN(CC3CCCC3)C2)C1	83.1	28.5667	6.2963
DDD01247395	CN1CCCC(CNS(=O)(=O)N2CCc3ccccc3C2)C1	77.4	28.5333	8.45005
DDD01297982	CN1CCCC1CNC(=O)CCCOC1=CC=C(Cl)C=C1	78.2	28.1333	2.85365
DDD01255962	COc1cccc(c1)[C@@H]1CCN(Cc2cn(C)c3ccccc23)C[C@H]1O	78	27.9	15.3646
DDD01056542	CCN1C(C)Cc2cc(ccc12)-c1cncn1CCCn1ccnc1C	86.6	27.8333	13.7326
DDD01057104	NC1CCc2nc(nc(Nc3cccc(F)c3)c2C1)-c1ccncc1	84.2	27.7867	15.978
DDD01249642	COc1ccc(C(=O)C2CCCN(CCc3ccccc3)C2)c(OC)c1	71.8	27.7667	7.86914
DDD01255728	COc1cc(CNCC(C)O)cc(Cl)c1OCc1ccc(C)cc1	73.9	27.7333	3.10698
DDD01250032	COc1ccccc1CCN[C@H]1[C@H](O)C2(CCNCC2)c2ccccc12	81.5	27.7333	4.62313
DDD01243908	Clc1cccc(N2CCN(CC2)C(=O)C2CC3(CN2)CCNCC3)c1Cl	79.2	27.7	15.2561
DDD01070058	COc1ccc(CNC(C)c2ccc(Cl)cc2)c(OC)c1OC	80.9	27.7	11.2
DDD01253749	Cc1nc(c[nH]1)-c1cc(C)cc2CC(CN)Oc12	80.1	27.6	15.0742
DDD01071223	Cc1cnn(CCNCC(O)c2ccc(cc2)C(F)(F)F)c1	72.6	27.5667	16.6091
DDD01246917	Cc1c[nH]c(CN2CCC3(C2)CCCN(Cc2ccc(F)c(F)c2)C3)n1	80.3	27.4667	10.5159
DDD01072379	CCN1CCCC1CN(CCN(C)C)S(=O)(=O)C1=C(C=CC=C1)C#N	79.6	27.4467	20.835
DDD01255871	COc1cccc(CNC(C)C)c1OCc1ccc(C)cc1	73.7	27.4	6.65056
DDD01035550	CC(N)Cc1ccccc1Sc1ccc(O)cc1	72.4	27.1667	7.38738
DDD01034888	CCOc1ccc(CNCCCn2ccnc2)cc1Cl	87.7	27.1	6.02329
DDD01297064	COC1=C(C=CC=C1)N1CCC(CNCC2=CC=C(C=C2)C#N)C1	94.1	27	20.8741
DDD01253948	COc1cc(F)ccc1C(N(C)CCN1CCOCC1)C(O)=O	80.7	26.9667	13.102
DDD01058008	CC(C)C[C@H](N)COc1cccc(F)c1Oc1ccc(Cl)cc1	86.5	26.9667	5.70731
DDD01245290	CN(C)c1nc2CCNCCc2c(n1)N(C)Cc1n[nH]c2CCCCc12	84.4	26.9	12.8791
DDD01080345	CCN1CCN(CC1)c1ccc(F)cc1C(C)NCc1ccncc1	72.4	26.8667	6.83837
DDD01067262	CN(C)c1nc(N)nc(CN2CCC(CC2)c2ccccc2)n1	80.4	26.8323	23.9392
DDD01077856	CCCN(C)CC1CCN(C1)c1ccc(Br)c(C)n1	73.7	26.7667	20.2268
DDD01069781	Fc1ccc(CNC2CCN(CCc3ccncc3)CC2)cc1F	89.8	26.7	11.5052
DDD01027967	Clc1ccc(COCC2CCN(Cc3ccccn3)CC2)cc1	90.7	26.6667	10.0152
DDD01249843	COc1cccc(CN(C)C(C)c2ccco2)c1OCCn1ccnc1	71.8	26.6667	7.0713
DDD01062922	Brc1ccc(CN2CCC(CC2)NCc2ncc[nH]2)cc1	83.5	26.66	16.1919
DDD01036289	CN(C)CCOCC1CN(Cc2ccc(C)s2)Cc2nnn(C)c12	73.9	26.6	6.60908
DDD01061239	Cc1ccc(nc1)[C@]1(O)CC[C@H]2CN(Cc3cc(C)c(O)c(C)c3)C[C@@H]12	74.6	26.5667	10.5192
DDD01069657	COc1ccc(CNC(=O)C2=NN(C(=O)CN2)c2ccc(C)cc2)cc1	75	26.5333	9.78996
DDD01032704	CCC(C)N1CCc2nc(nc(NC(C)C)c2C1)N1CCCC1	78	26.5333	7.86787
DDD01074627	COc1cccc(CNC(C)c2ccc(cc2)-n2ccnc2)c1O	79.5	26.47	15.2672
DDD01252330	Cc1cc(nc(N)n1)N1CCCC(C1)c1[nH]ncc1Cc1ccccc1	73.6	26.4	0.953939
DDD01250321	COc1ccc(NC2CCN(CCc3ccccc3)CC2)cc1OC	84.8	26.3933	16.5332
DDD01059873	COCCN1CCC(CC1)c1cncc(n1)-c1cccc(Cl)c1	71.1	26.3667	9.8764
DDD01070191	COC(=O)C(C)(C)NC(=O)c1cnc(Cc2ccc(F)cc2)s1	75.4	26.2333	13.6917
DDD01297847	Cc1ccsc1CNCC1CCCN1c1cccnn1	78.8	26.2067	21.9149
DDD01076341	COc1ccccc1OCCN(C)c1cc(C)nc(N)n1	70.2	26.2	9.37443
DDD01249691	OC1(CNCC2CCCCC2)CCCN(Cc2ccc(F)c(F)c2)C1=O	74.1	26.1333	13.3238
DDD01059916	NCCn1nc(C2CCN(Cc3ccccc3)C2)c2nccnc12	80.4	26.1333	8.11193
DDD01256654	COCCN(CC1CC1)c1nc(CCN)nc2sc(C)c(C)c12	77.5	26.1333	2.1362
DDD01244917	CO[C@H]1CNC[C@@H]1NC(=O)c1cc(C)nc2c(C)cc(C)cc12	75.1	26	14.2281
DDD01251780	O=C(NCc1cc2CNCCCn2n1)C1(CCCCC1)c1ccccc1	73.7	25.9667	11.4936
DDD01068180	COc1cc(ccc1SC(F)F)C(C)NCc1ncccc1C	75.7	25.8	11.7818
DDD01078570	CN(CC(O)c1ccc(F)c(F)c1)CC1CCN(CCO)CC1	76.5	25.6333	10.9455
DDD01072550	CN1CCCN(CC1)c1nc(nc2sc(C)c(C)c12)C(F)(F)F	76.1	25.5	7.20625
DDD01081338	CN1CC[C@H]2[C@H](C[C@@H](CN3CCCC3)N2c2nccs2)C1	73.7	25.4333	2.95353
DDD01076282	CSCc1cc(F)ccc1CNCc1cccc(O)c1	72.6	25.3	3.2078
DDD01070577	CCN1CCN(CC1)c1ccc(F)cc1C(C)NCc1ccnn1C	76.3	25.2333	12.1541
DDD01058316	CCCN1CCCC(O)(CC1)c1nc(C)c(COc2ccccc2)s1	83.2	25.0667	4.95614
DDD01056853	OCCN1CCCC(C1)c1cccc(n1)-c1ccccc1F	83.4	25.0367	25.919
DDD01035983	CCOc1ccc(CNCCCn2ccnc2)cc1Br	80.1	25.0333	6.24046
DDD01248929	COc1ccc(c(CN2CCOCC(CN(C)C)C2)c1)-n1cccn1	78.4	24.9133	18.2803
DDD01061900	Cc1c(F)cccc1S(=O)(=O)NC(C)(C)CN	80.9	24.9	11.1499
DDD01257357	CCN(C)C[C@@H]1CN(C[C@@H]1CO)S(=O)(=O)c1cccc(Cl)c1	75.3	24.8	9.13947
DDD01253323	COc1ccc(F)cc1CN1CCC(O)(CN2CCCCC2)C1	70.9	24.8	10.0344
DDD01057577	CC1(C)CC(CC(C)(C)N1)N(Cc1ncc[nH]1)Cc1ccccc1	70.3	24.6667	3.57258
DDD01295708	CC(C)c1cc(n[nH]1)C(=O)N1CCCCC1c1nc(C)cs1	76.4	24.4	10.4704
DDD01079142	OC(CNC1CCSCC1)c1cccc(OCc2ccccc2)c1	74.4	24.3467	16.2871
DDD01255612	Cc1cccc(CN2CCCC(O)(CNCc3ncccc3C)C2=O)c1	82.1	24.3	10.1208
DDD01251572	CCn1ncc(CN2CCCC(C2)C(=O)c2ccc(Cl)cc2)c1C	70.5	24.1	7.59737
DDD01078822	COC1=C(C)C(CN(C)C2CCCCC2)=NC=C1C	76.7	23.9867	18.0953
DDD01256515	C1CC2(CN1CCC2)Oc1cccc(Oc2ccccc2)c1	76.9	23.8233	13.6335
DDD01247830	CC(NCC1CCCC1)c1cnn(c1C)-c1ccc(F)cc1F	71.9	23.6333	12.4066
DDD01077188	CN(Cc1cccc(F)c1)C(=O)CS(=O)(=O)Cc1c(Cl)cccc1Cl	82.7	23.6333	8.04322
DDD01255469	CNc1cc(C)nc(n1)N1C[C@H](N)[C@H](C1)C1CC1	88.3	23.2	5.80259
DDD01257145	CCOC(=O)C1(Cc2ccccc2)CCCN(Cc2nccn2CC)C1	71.1	23.0667	4.80139
DDD01248540	CN(Cc1ccon1)c1nc(nc2CCNCCc12)-c1ccccn1	76.3	22.95	15.7289
DDD01253272	COc1ccc(F)c(CN2CCCC(O)(CNC3CCCCC3)C2=O)c1	70.3	22.81	12.9463
DDD01058007	CC(C)C[C@H](N)COc1cccc(F)c1Oc1cccc(Cl)c1	85.5	22.7333	10.851
DDD01297561	CCOC1=C(CNCC2CCN(CC(C)O)CC2)C=CC=C1	75.9	22.6967	15.3849
DDD01034889	COc1ccc(Cl)cc1CNCCCn1ccnc1	82.3	22.5667	12.6666
DDD01254659	CN(CC(=O)N1CCCC(COc2cccc(C)c2)C1)C1CCNCC1	73.8	22.4533	31.0305
DDD01067705	CC(NCc1ccc(OCC(N)=O)cc1)c1ccc2CCCCc2c1	73.4	22.4333	10.2207
DDD01085252	Fc1cnc(nc1)N1CCOC2(CCN(Cc3ccsc3)CC2)C1	81.6	22.3	12.1655
DDD01058832	Fc1cccc(Nc2nc(nc3CCNCc23)N2CCCC2)c1	84.3	22.2	10.7093
DDD01248141	CC(N)C(=O)N1CCC(CC1)Oc1cccc(c1)C(F)(F)F	76.6	22.0633	15.0976
DDD01249611	COc1ccc(c(OC)c1)-c1ccccc1CCN	81.6	21.9333	35.8231
DDD01256747	CN(C)C[C@@H]1CN(C[C@@H]1CO)C1CCN(CC1)c1ccc(Cl)cc1	88.5	21.9333	10.8639
DDD01073665	CCC(=O)NCC(=O)NCC1(CCCC1)C1=C(F)C=CC=C1F	73.7	21.4833	21.7494
DDD01249680	CCc1[nH]c2c(CNc3nccc(N)n3)cc(C)cc2c1C	90.9	21.4667	9.95004
DDD01058375	CCC(CN1CCOCC1)n1cncc1-c1ccc2N(CC)CCc2c1	94.5	21.4667	18.7089
DDD01256819	Cc1nc[nH]c1CN(Cc1nccs1)Cc1ccccc1	75.7	21.2833	24.1522
DDD01061753	COc1ccc(cc1Cn1cccn1)C(C)NCc1cscn1	71.6	21.1667	2.18251
DDD01069780	CSc1ccc(CNC2CCN(CCc3ccncc3)CC2)cc1	93	21.16	10.9314
DDD01058321	CN1CCCC(C1)c1cncc(n1)-c1cccc(c1)C(F)(F)F	77.3	21	3.46987
DDD01058874	Clc1ccc(NC(=O)c2cncc(n2)C2CCNCC2)nc1	70	20.91	11.812
DDD01253047	CNC1CCN(CC1)C1CCN(CC1)c1ccc(cc1)-c1ccco1	86.4	20.8667	2.31805
DDD01074508	CN(C1CCCN(C1)c1cccnn1)c1ncnc2ccccc12	74.4	20.6	8.51058
DDD01061154	COc1cc(OC)c(cc1OC)C1Nc2cc(Cl)ccc2C2=NCCN12	81.7	20.5667	6.35164
DDD01081364	Cc1ccc2c(c1)C(CC21CCNCC1)NC1CC1	83.2	20.3667	11.9605
DDD01244322	Cc1ccc(Sc2ccc(CN3CCC4(C3)CCCNC4=O)o2)cc1	73.1	20.2583	18.0145
DDD01245169	CO[C@H]1CN(C[C@@H]1NC(=O)Nc1ccc(cc1)C(F)(F)F)C(C)C	71.5	20.17	15.4016
DDD01257059	CN(C)CC1(O)CCN(C1)c1cc(C)nc2cc3OCOc3cc12	89.9	20.1333	9.25221
DDD01251105	CCOc1ccc2nc(CN3CCC(CN)C3)ccc2c1	85.5	20	9.39202
DDD01249964	Cc1cc(CN2CCC(C2)C2CCN(CCc3ccccc3)CC2)[nH]n1	93.5	19.8333	5.94671
DDD01029666	O=S(=O)(NC1CCC11CCN(CC2CC2)CC1)c1ccccc1	71.2	19.8	4.33128
DDD01251646	CCc1nc(N)nc(N2CCCC3(CCN(C)CC3)CC2)c1C	75.9	19.7667	4.95412
DDD01246613	C1Cc2c(CN1)ncnc2N1CCC(CC1)c1ccccc1	74.4	19.7533	15.4661
DDD01250972	CCn1cc(CN2CCCCC2CCn2ccnc2C)cc1C#N	78.2	19.5667	9.942
DDD01249031	COc1cc(C)c(cc1C)-c1ccc(F)c2CC(CN)Oc12	83.8	19.4333	8.71225
DDD01247624	CN(Cc1cc2cc(F)ccc2[nH]1)c1cc(ncn1)C1CCCNC1	84.2	19.4033	16.9145
DDD01245902	CCC(C)N(Cc1c[nH]c(C)n1)Cc1ccc(C)cc1	77.5	19.3707	17.8546
DDD01252678	COc1cc(Oc2ncccc2C(F)(F)F)ccc1CN1CCCC1	79.4	19.0933	17.6017
DDD01057106	Cc1cc(Oc2ccc(NC(=O)C3CC3)cc2)cc(n1)C1CCNCC1	87.8	19.0633	11.5293
DDD01061884	Cc1cnn(CC2CCN(CC(O)c3ccccc3Cl)CC2)c1	78	19.0333	3.56978
DDD01247545	CN1[C@@H]2CC[C@H]1CN(CC2)C(=O)c1ccc([nH]1)-c1ccccc1	79.7	18.9933	16.2674
DDD01068908	CCn1ccnc1CN1CCCC1C(=O)Nc1nccs1	85	18.9887	23.3214
DDD01250759	C(C1CCCC1)c1nc(CN2CCCC3(CCOC3)C2)c[nH]1	82.2	18.96	18.1719
DDD01031814	CC(C)NC(=O)[C@@H]1CC[C@@H]2[C@@H](CCN2Cc2cn(C)c3ccccc23)O1	77.6	18.8333	6.20027
DDD01032383	CC1=N[C@@]2(CC[C@@H]3CN(Cc4ccccc4C)C[C@H]23)C(=O)N1CC1CC1	85.1	18.8	4.95681
DDD01250878	CCCOc1cc(Cl)c(CN2CCNC(C2)C(=O)NC2CC2)cc1OC	75.4	18.6533	16.3468
DDD01059015	CC(C)CN1CCCC1c1cc[nH]n1	91	18.5833	22.1288
DDD01255511	COc1ncc(c(OC)n1)-c1cc(NC2CCCC2)nc2[nH]ccc12	74	18.55	19.9017
DDD01069344	CN(C)CCN1CCC(CC1)NC1CSCCc2ccccc12	76.5	17.9733	16.8823
DDD01034347	CO[C@@H]1CCN(Cc2ccccn2)[C@@H]2CN(Cc3ccco3)C[C@H]12	81.6	17.9667	4.36157
DDD01254235	Cn1ccnc1CN1CCCC(CCc2ccc(F)c(F)c2)C1	74.5	17.8333	24.9604
DDD01061196	Cc1cc(C[C@@H]2CCC[C@H]2NCc2cc(C)c(O)c(C)c2)on1	79.9	17.68	16.8216
DDD01074677	CCOc1cccc(CNC(C)c2ccc(cc2)-n2ccnc2)c1O	75	17.6133	13.8338
DDD01248434	CC(C)N1CCCC(C1)C(=O)N1CCN(CC1)c1nsc2ccccc12	70.4	17.4667	28.1674
DDD01058205	O=C(N1CCCC1)C1(Cc2ccc(cc2)-c2cccs2)CCNC1	84.5	17.3667	0.981495
DDD01297486	Cc1cnn(CC2CCCN2Cc2cn3ccsc3n2)c1	81.3	17.3633	9.30425
DDD01296482	C(N1CCCC1c1noc(n1)C1CC1)c1ccc2ccccc2n1	72.7	17.17	24.4183
DDD01084400	CN(Cc1ccco1)[C@@H]1CN(Cc2ccc(C)s2)C[C@@H]2CCCO[C@H]12	74.2	17.1667	21.0244
DDD01083787	COc1ccc(CN2C[C@@H]3COC[C@H]([C@@H]3C2)N2CCN(C)CC2)cc1	73.9	17.1433	9.92742
DDD01034904	CCOc1c(Br)cc(cc1OC)C1C2=C(COC2=O)Nc2[nH]nc(C)c12	81.1	17.06	7.63825
DDD01026554	Cc1cccc2n(CC(=O)NC[C@@H]3CCCN4CCCC[C@H]34)ccc12	70.9	17.0527	16.7724
DDD01235984	Cc1[nH]c2ccccc2c1-c1ccnc(NCCN2CCOCC2)n1	82.5	17.0467	13.499
DDD01254391	CN1CCCC1CCn1ccnc1-c1nc2ccccc2[nH]1	72.2	16.7	5.42494
DDD01297697	FC(F)(F)C1=CNC(=O)C(NC(=O)NCC2=CN=CC=C2)=C1	79	16.6533	18.0216
DDD01061233	CN(C)c1ccc(CN(CCCn2ccnc2)Cc2c[nH]cn2)cc1	79.8	16.6067	8.41808
DDD01058580	CN1CCCC(C1)c1cccc(n1)-c1cccc(c1)C(F)(F)F	73.7	16.5333	8.47899
DDD01073009	Cc1cc(nc(C)n1)N1CCC(CC1)NCCOc1ccccc1	75	16.2667	30.4533
DDD01255912	Cc1sc2nc(CCN)nc(N3CC(C3)N3CCCCC3)c2c1C	81.6	16.2567	17.8472
DDD01254508	NC1CCN(CC1)C1CCN(CC1)c1ccc(cc1)-c1ccco1	80.3	16.205	15.1835
DDD01303279	OC(COCC1=CC=C(Cl)C=C1)CN1CCC(CC1)C1=CC=NN1	70.9	16.1533	10.5535
DDD01252856	CCn1ccnc1CN(C)C1CCCN(Cc2ccccc2F)C1	70.4	16.1333	4.70035
DDD01247671	CCc1c(C)sc2ncnc(N3CC[C@H]([C@H](O)C3)N3CCC(O)CC3)c12	75.5	15.6602	16.8239
DDD01254238	CC(Cc1ncccc1C)N(C)Cc1cccs1	81.7	15.5533	14.9703
DDD01076778	CS(=O)(=O)NCC1CCCN(CC2=C(F)C=CC=C2)C1	89.2	15.3267	12.26
DDD01063959	CC(C)(C)OC(=O)N1CCCN(Cc2ccon2)c2ccccc12	84.5	15.2867	16.5572
DDD01256078	CCCNCc1ccc(cc1)-c1cc(N)nc2[nH]ccc12	72.3	15.2833	10.1218
DDD01059258	CCN1C(C)Cc2cc(ccc12)-c1cncn1CC(=O)NC(C)(C)C	73.2	15.2267	16.49
DDD01252780	NCC1CCN(C1)c1nc(nc2CCNCCc12)C1CCCC1	93.5	14.9633	5.8283
DDD01252399	CN(Cc1n[nH]c2CCCCc12)c1nc(nc2CCNCCc12)C1CC1	89.5	14.9033	11.6935
DDD01034967	CC1CCN(CC(O)Cn2c(C)c(C)c3cccc(Cl)c23)CC1	83	14.874	14.1193
DDD01244483	CC(C)c1cc(N2CC[C@H](F)C2)n2nccc2n1	70.9	14.8633	11.0569
DDD01070676	CN1CCN(Cc2ccccc2CNC(=O)c2cc(Br)ccc2F)CC1	77.5	14.8	16.6694
DDD01034905	COc1cc(cc(Br)c1O)C1C2=C(COC2=O)Nc2[nH]nc(C)c12	91	14.7967	13.8083
DDD01251132	CCN(C)S(=O)(=O)NCC1CCCN(Cc2ccccc2F)C1	74.5	14.76	10.8201
DDD01253018	CS(=O)(=O)c1ccc(cc1)-c1cc(O)cc(CCC2CCCCN2)c1	70.3	14.6867	8.61641
DDD01031405	CC(C)Nc1nc2CCN(Cc3nccn3C)CCc2c(NC2CC2)n1	76.1	14.6633	10.4819
DDD01247498	C(C1CCN(CC1)c1nc(nc2CCNCCc12)C1CC1)n1cccn1	91	14.58	7.47189
DDD01243807	CCC[C@H]1CN(C[C@@H]1N)S(=O)(=O)c1c(C)noc1C	82.5	14.27	15.2081
DDD01251786	COc1ccc(CN2CCCC2)cc1Oc1ccc2OC(CN)Cc2c1	88.2	14.04	17.3931
DDD01251184	COc1ccc(cc1CNC1CCCC1)-c1ccoc1	70.2	13.9667	17.6154
DDD01251999	CCN(CC1CCCN(CCc2cccc(OC)c2)C1)C(=O)CN(C)C	83.3	13.87	22.2448
DDD01074065	NC(CC1CCCC1)c1ccc(Oc2ccccc2)cc1	79.9	13.66	20.2006
DDD01062586	CC(C)(C)c1cn2CCCC(CNCc3cnn4ccccc34)c2n1	80	13.6	57.5151
DDD01059668	Cc1ccc(CN(CCCn2ccnc2)Cc2c(F)cccc2F)s1	81.5	13.5433	9.04028
DDD01252690	CN1CCC2(CC1)CN(Cc1ccc(o1)C1CCCCO1)CCCN2C	81.1	13.5333	2.57941
DDD01029581	C1CC2(CCNCC2)c2cc(ccc12)-c1cccnc1	71.1	13.5233	24.1481
DDD01059167	NC(=O)C1(Cc2ccc(cc2)-c2ccccc2)CCNC1	92.7	13.2667	2.24796
DDD01251461	CC(C)C1CN(CCCN1Cc1ccc(F)cc1)c1cccc(n1)C#N	91.3	12.9833	17.2801
DDD01024763	Cc1ccc2[nH]c(nc2c1)[C@H]1CCN(CC2CCCCC2)C1	74.7	12.9567	12.3686
DDD01244198	CC(C)c1cncnc1N1CCCC(CO)(Cc2ccccc2C)C1	85	12.9261	11.3729
DDD01031437	CN(C)CC(=O)N1CCC2(CCc3cc(ccc23)-c2cccnc2)CC1	80.1	12.8	0.556776
DDD01297275	CC(C)N(Cc1ccccn1)Cc1nc2n(C)ncc2c(=O)[nH]1	74.2	12.76	10.5656
DDD01069986	COc1ccc(CNC(C)c2ccccc2Cl)c(OC)c1OC	75.6	12.64	12.7514
DDD01248934	FC(F)(F)c1ccccc1CCC1CCCN(Cc2cscn2)C1	79.6	12.4	23.8648
DDD01252547	CC(Nc1ncnc2CNCCc12)c1ccc2CCCCc2c1	71.2	12.36	4.37388
DDD01247001	O=C(CN1C[C@@H]2CC[C@H]1CN(Cc1ccccn1)C2)Nc1ccccc1	83.6	12.1733	15.8201
DDD01245524	CC(C)(C)c1cc(CN2C[C@@H]3CC[C@H]2CN(Cc2ccccn2)C3)n[nH]1	74.1	12.1467	13.321
DDD01248459	CSC(C)CCN1CCC(CC1)n1cc(nn1)C1CCCCC1	78.4	12.1233	13.6996
DDD01058941	CCN(CC)S(=O)(=O)N1C[C@H]([C@H]2[C@H]1CCCCCN2C)c1ccccc1	71.7	12.08	17.0283
DDD01077787	CC(NCCN1CCC(CC1)N(C)C)c1cc(C)sc1C	81.6	12.07	7.8858
DDD01058524	CN1CCCC(C1)c1cccc(n1)-c1cccc(F)c1	74	11.9233	3.26797
DDD01077353	COc1cccc(CNCc2cccnc2-n2cccn2)c1OC	70.1	11.7	8.67929
DDD01298121	COc1ccccc1COCC(O)CN1CC(C1)n1cccn1	78.9	11.6733	18.8339
DDD01059464	Fc1ccc(cc1)-c1nccnc1C1CCCNC1	76.6	11.588	11.8645
DDD01071367	NC(=O)c1ccc(N2CCCCC2)c(NC(=O)c2ccc(Br)cc2)c1	71.3	11.5367	8.22504
DDD01258220	COC(=O)c1cc(OCC2CCC2)cc(c1)C(=O)N[C@@H]1CNCC[C@H]1O	90.1	11.4	27.5991
DDD01027661	Cc1cc(CN2CCC(CNS(=O)(=O)c3ccccc3F)CC2)c(C)o1	79.2	11.3567	19.1405
DDD01243834	CCc1ccc(CN(C)c2ccc(cn2)-c2nc(COC)no2)nc1	78.4	11.2467	22.0457
DDD01295689	CCOCCCN1C(NC(=O)C2=NOC(C)=C2)=NC2=C1C=CC=C2	71.5	11.06	14.8539
DDD01255315	COCCNc1nc2CCNCCc2c(NCCc2cccs2)n1	81.9	10.8867	19.1321
DDD01245473	Fc1ccc2[nH]c(nc2c1)C1CCCN1Cc1c[nH]cn1	81	10.6933	11.8705
DDD01058009	CC(C)C[C@H](N)COc1cccc(F)c1Oc1ccccc1	70.9	10.42	0.679117
DDD01077358	Fc1ccc(OCCNC2CCN(Cc3ccncc3)CC2)c(F)c1	74.2	10.2333	21.7086
DDD01029320	Clc1ccc(CN2CCC3(CCCNC3)C2=O)cc1	85.4	10.12	4.9278
DDD01034120	OCCN1CCC2(CC1)CC(NCc1ccccn1)c1ccccc1O2	70.8	9.89	10.4541
DDD01066471	CCCOc1ccccc1C(N)CC(C)C	75.1	9.83333	26.0753
DDD01251971	CCCc1cc(nc(C)n1)N1CCC(CC1)NCCc1ccc(O)cc1	82.1	9.63967	10.946
DDD01065442	CC1=C2C=CC=CC2=NC(CN2CCCCC2CN2C=CC=N2)=N1	70.4	9.5	17.1616
DDD01253885	CCc1cc(CN2C[C@@H]3CC[C@H]2CN(C3)C2Cc3ccccc3C2)on1	88.2	9.3	20.4858
DDD01029061	COc1ccc(CN2C[C@H]3C[C@H](CN(C)C)O[C@H]3C2)cc1	79.6	8.84333	7.55226
DDD01034798	Clc1ccc(cc1)N(CC(=O)c1ccccc1)C1=NCCCCC1	75.5	8.80333	15.3892
DDD01029161	CO[C@H]1CCNC[C@@H]1Cc1ccc(OC)cc1	78.3	8.32333	15.0709
DDD01030442	Fc1cccc(c1)N1CCC2(C1)CN(CCC2(F)F)C(=O)c1c[nH]cn1	86.2	8.28333	4.82527
DDD01058401	Fc1ccc2[nH]c3c(CCN4C(N5CCC34CC5)c3ccccn3)c2c1	81.2	8.27333	4.68205
DDD01296488	Cc1nc(CN2CCCC2c2noc(n2)C2CC2)nc2ccccc12	78.7	8.13	20.5375
DDD01252355	CCc1cnc(N)nc1NCCCn1cc(Cl)cn1	84.5	8.1	34.3117
DDD01300981	CN1C=CN=C1CN1CCN(CC(O)C2=CC(C)=C(C)C=C2)CC1	80.4	8.0109	16.3274
DDD01247230	Cc1cc(no1)-c1nn(C)c(Cl)c1CN1CCCCC(N)C1	70.3	7.9	17.166
DDD01080327	Cc1cc2NCC(CNC3CCN(Cc4ccccc4C)CC3)Cn2n1	71	7.73667	17.2353
DDD01066552	NC(=O)CCC1CCCN(C1)c1ccnc2cc(F)ccc12	83.4	7.6	21.8259
DDD01246934	CC(NCc1cn(CCC(N)=O)c2ccccc12)c1ccc(C)c(C)c1	82.8	7.50333	15.2134
DDD01026343	OC1CN(CC(=O)N(Cc2cccs2)C1)C(=O)c1ccc(F)cc1	88.8	7.3	26.749
DDD01057017	Cc1ccccc1CN1CCCC1c1cccc(Nc2nccs2)n1	84.8	7.26667	16.6533
DDD01061153	COc1ccc(cc1OC)C1Nc2cc(Cl)ccc2C2=NCCN12	72.2	7.11667	15.2525
DDD01076751	CN1CCN(CC1)c1ncc(CNCCCc2cccc(F)c2)cn1	71.5	6.93333	16.0706
DDD01034744	CN1CCC2=C(C1)C1=NN=CN1C(NCCC1=CC=CC=C1)=C2C#N	70.9	6.88	20.4705
DDD01303481	Cc1nc(CN2CCCC(C2)NCCc2ccccc2Cl)no1	82.3	6.76667	10.3287
DDD01245334	CC(C)c1ccc(CN2C(=O)C3(CCNCC3)Nc3ccccc23)cc1	82	6.46667	15.1441
DDD01296493	CCC1CCCN(Cc2nc(N)c3ccccc3n2)C1	74	6.39	16.0584
DDD01251356	Cc1ccccc1SC1CCN(CC1)C(=O)C1[C@H]2CNC[C@@H]12	73.3	6.28667	14.7267
DDD01059118	CN1CCCC(C1)c1cncc(n1)C(=O)NCc1ccccc1Cl	72.4	6.26	19.1722
DDD01255730	Cc1ccc(CCN[C@H]2[C@H](O)C3(CCNCC3)c3ccccc23)s1	87.1	6.04333	4.206
DDD01074975	Fc1cccc(N2CCCC2)c1NS(=O)(=O)c1cccc(c1)C#N	74.1	5.99333	15.0856
DDD01026725	CN(C)CCN1C(C)=C(C)C2=C1N=C(C1=CC=CC=C1)C(C)=C2N	80.1	5.94933	13.4198
DDD01250857	Cc1cnccc1N1CCN(C[C@]2(O)CCCN3CCCC[C@H]23)CC1	75	5.9	14.979
DDD01084433	CN(C)CCNC(=O)c1ccn(n1)-c1ccc2ccccn12	84	5.83333	15.3409
DDD01058710	Cc1cccc(Nc2ccc(cn2)C2CCCCN2)n1	81.4	5.761	12.025
DDD01029505	Fc1ccccc1C(=O)N1CC2(CCNCC2)c2cc(Cl)ccc12	77	5.66333	8.11999
DDD01247103	CCC(C)N1CCC(CC1)Oc1ccc(cc1Cl)C(=O)NCCN(C)C	79.7	5.15333	8.45982
DDD01060663	CCCN(C(=O)c1cccnc1)c1nc-2c(CCc3c-2cnn3C)s1	82.4	5.03333	18.8471
DDD01249035	CN(Cc1nc2cc(C)ccc2[nH]1)Cc1n[nH]c2CCCc12	82.3	4.79	7.09825
DDD01029479	Clc1ccc2N(CC3(CCNCC3)c2c1)C(=O)c1ccco1	76.1	4.44667	5.41814
DDD01079462	O=C(CN1CCCC(C1)c1ccn[nH]1)Nc1nncs1	89.1	4.31	10.922
DDD01255894	Clc1ccccc1CS(=O)(=O)NCCCN1CCCC1	79.2	4.3	17.606
DDD01252874	CNc1cc(C)nc(n1)N1Cc2cnn(Cc3ccc(F)cc3)c2C1	91.9	4.22	20.932
DDD01059596	CCc1ccccc1Nc1noc2CCN(Cc12)C(=O)CCOC	85.1	4.01	15.9816
DDD01301030	Fc1ccc(C(=O)NCCCNc2ccc(cn2)C(F)(F)F)c(F)c1	72.5	4.01	11.4249
DDD01247697	Cc1n[nH]cc1C(=O)NCc1cccnc1N1CCc2ccccc2C1	75.3	3.86667	20.1793
DDD01031982	COCCN1CCc2cc(C(=O)NC(C)C)c(NCC(C)C)nc2CC1	78.9	3.80333	20.9455
DDD01255865	CCc1ccccc1OCCNCCc1c[nH]cn1	71.2	3.13667	11.4508
DDD01251125	CC(C)CN1CCC(CC1)NCCNc1ccncc1C	80	2.77633	7.07149
DDD01247480	COc1cc(CN2CCCC(C2)Nc2cccc(F)c2)cc(Cl)c1O	91.7	2.63667	6.55159
DDD01062585	Cn1cccc1CNCC1CCCn2cc(nc12)C(C)(C)C	75.7	2.59833	16.7314
DDD01245648	CN(C)CCN(CC1CCCO1)c1nc(CCN)nc2sc(C)c(C)c12	70.2	2.51667	16.7695
DDD01249003	NCC1Cc2cccc(c2O1)-c1ccc(O)c(F)c1	82.9	2.37	29.5695
DDD01029302	O=C(N1CCC2(CC1)C(=O)N(CC1CC1)c1ccccc21)c1ccoc1	74.7	1.62	24.9217
DDD01250528	CCc1[nH]c2c(CNc3nccc(N)n3)cc(F)cc2c1C	85.6	1.37333	6.62533
DDD01031802	CC(C)CN1CCCC2(CCN(C2)c2ccccn2)C1	71.2	1.32833	21.1021
DDD01252490	CCCn1ncc(CN2CCCC(C2)C(=O)c2ccc(Cl)cc2C)c1C	78.4	1.2	19.8879
DDD01257217	NCC(=O)N1CCCC1c1ccc(s1)C(=O)NCc1ccoc1	92.6	0.716667	5.82263
DDD01256180	CC(C)CN1CCC(CC1)NCCNc1cccnc1	79.1	0.603333	14.8254
DDD01077697	CC1CN(Cc2ccccc2)CCCN1CCNS(C)(=O)=O	71.7	0.226667	16.5219
DDD01027966	Fc1ccc(COCC2CCN(Cc3ccccn3)CC2)cc1	78.8	-0.0433333	33.3812
DDD01058403	Fc1ccc2[nH]c3c(CCN4C(N5CCC34CC5)c3ccncc3)c2c1	89.6	-0.213333	7.17898
DDD01032971	CC(C)Oc1ncnc2CCN(Cc3ccc(F)cc3)CCc12	70.8	-0.34	13.6611
DDD01253598	Cc1[nH]c2c(CNc3nccc(N)n3)cc(C)cc2c1C	79.5	-0.373333	20.0246
DDD01058624	COc1cccc(Nc2nc(nc3CCNCc23)N2CCCC2)c1	85.7	-0.693333	9.80156
DDD01243633	CCC(CO)N(Cc1cccc(O)c1)Cc1ccccc1C	75.2	-0.7	20.8192
DDD01302767	CC1=C(C=C(Cl)C=C1)N1CCC(CNC(=O)CCN2C=CN=C2)C1	84.2	-1.23333	27.4748
DDD01256650	CC(C)Cc1ncc2CN(Cc2n1)C(=O)c1ccc(CN2CCCC2)o1	70.3	-1.40333	7.88676
DDD01254779	CN(CCn1ccnc1C)c1nc(nc2CNCc12)-c1ccc(Cl)cc1	70.5	-1.56667	20.7389
DDD01244097	CN(C)CCCN(C)C1CCN(CC1)c1cccc(c1)-c1cscn1	81.2	-1.59333	2.78504
DDD01248248	Cc1ccc(NCCCNC(=O)C2CCCN(Cc3ccco3)C2)nc1	70.6	-1.98	4.40299
DDD01244506	OCCCN1CCc2[nH]nc(C(c3ccccc3)c3ccccc3)c2C1	73	-2	30.1443
DDD01257020	O[C@]12CCNC[C@H]1CN(CC2)c1ccnc2ccccc12	92	-2.09633	25.3432
DDD01029500	CCOC(=O)N1CC2(CCNCC2)c2cc(Cl)ccc12	78	-2.20667	11.4639
DDD01245650	CC(N1CCCCC1)c1ccc(cc1)-c1cnc(N)c(C)c1	91	-2.43333	17.6322
DDD01244782	CSc1cccc(CN(C)C(=O)c2cccc(c2)C2CCCNC2)c1	77.5	-2.74667	17.1902
DDD01073514	Clc1c(n[nH]c1C(=O)N1CCN(CC1)S(=O)(=O)c1ccccc1)C1CC1	75.8	-4.4	19.2632
DDD01027070	Clc1ccc(Cl)c(NC(=O)COc2coc(CN3CCCC3)cc2=O)c1	80.6	-4.59333	8.39601
DDD01244480	Clc1cccc2c3CN(Cc4cc5CNCCn5n4)CCc3[nH]c12	79.1	-4.98	9.07897
DDD01076974	COc1ccccc1CNCc1nn(c2CCCc12)-c1ccccc1	81.6	-5.36	6.67089
DDD01070517	CC1=NN2CC(CNC3CCN(CC4=CC(C)=CC=C4)CC3)CNC2=C1	86.5	-5.42533	11.6067
DDD01249070	COC[C@H](C)Nc1cc(C)c2ccc(SC)cc2n1	75.5	-6.23667	27.1645
DDD01303987	C(Nc1ncnc2ccccc12)C1CCCN1c1cccnn1	81.1	-6.27	11.8096
DDD01067852	Cc1ccc(cc1NCC(=O)Nc1ccccc1Cl)-n1cnnn1	79.3	-6.27	9.71683
DDD01248106	Cn1nc(C2CC2)c2C(CC(=O)Nc12)c1cc(CN2CCCC2)cs1	81.9	-6.37	22.6222
DDD01071943	CCC(=O)NCC(N1CCc2sccc2C1)c1ccc(SC)cc1	77.1	-6.76633	10.819
DDD01029332	Clc1cccc(CN2CCC3(CCCNC3)C2=O)c1	80.7	-7.99667	13.9887
DDD01249528	CCC(C)CN1CCC(CC1)n1cc(nn1)C1CCCCC1	77.1	-8.09867	12.3981
DDD01247638	Cn1ncc2c(NC3CCSC3)nc(nc12)-c1ccncc1	83.1	-8.711	8.39703
DDD01249108	CN1CCC(CC1)c1cc(nc(C)n1)N1CCOc2ccc(Cl)cc2C1	70.7	-9.53333	41.4869
DDD01249813	COc1ccc(CCN)cc1-c1ccc(O)cc1	85.6	-10.6333	38.7402
DDD01251198	Cc1nc2CCNCCc2c(NCc2nc3ccccc3s2)n1	71.3	-10.6767	13.9632
DDD01078047	CN1CCN(CC1)c1ccc(NC(=O)c2cccs2)c(c1)C(F)(F)F	73.6	-12.0333	12.0598
DDD01249331	COc1cc(C)c(CN2CCC3(CC2)[C@H](O)C[C@@H]3OCCN)cc1C	77.2	-12.8467	20.4252
DDD01244252	CCNc1ccnc(n1)N1Cc2cnc(CC(C)C)nc2C1	74.6	-12.8567	18.8687
DDD01256238	O=c1[nH]c(NC2CCCC2)nc2nccc(-c3ccco3)c12	72.4	-13.0133	28.3786
DDD01072906	Clc1ccc(cc1)S(=O)(=O)NCCN1CC=CC1	76.2	-13.0433	38.4545
DDD01247351	Cc1nc2CCNCCc2c(NCc2ccc(s2)-c2ccccn2)n1	73.6	-13.24	10.5447
DDD01058623	COc1cccc(Nc2nc(nc3CCNCc23)-c2ccncc2)c1	82.2	-13.7	0.2
DDD01069329	COc1cc2nc(NCc3scnc3C)nc(N)c2cc1OC	89.8	-14.8967	19.3984
DDD01255988	CC(C)c1cc(N(C)Cc2cc(on2)C2CC2)n2nccc2n1	80.3	-16.2667	19.7571
DDD01253857	C(NC1CCC2(CCNCC2)CC1)c1noc(n1)-c1ccco1	73.4	-16.4767	22.4732
DDD01026555	Cn1c(CN2CCCCC2)cc(=O)c(O)c1CN1CCCCC1	81.8	-16.9333	35.6758
DDD01244948	Fc1ccccc1CC1CCN(Cc2ccccn2)CC1	70.4	-19.4167	17.8406
DDD01304677	Cc1cn2nc(sc2n1)N1CCCC1CC(C)(C)C	71.6	-19.52	21.6248
DDD01069328	COc1cc2nc(NCc3ccc(C)nc3)nc(N)c2cc1OC	90.6	-20.1	7.07602
DDD01036092	CCC1(CC)CC2=C(C=CC=C2)C2=C1C(=O)NC(CN(C)C)=N2	74.6	-20.4667	27.2225
DDD01029980	CC(C)Nc1nc2CCN(Cc2c(NC2CC2)n1)C(=O)Cc1ccsc1	75.6	-20.68	32.7446
DDD01072747	CC(C)C1CCCN1C(=O)c1ccc(cc1)-n1ncc(C#N)c1N	71.4	-21.9067	30.0352
DDD01057028	Oc1cc(nc(n1)-c1ccccn1)C1CCCCN1Cc1cccs1	85.9	-23.4433	30.6075
DDD01248328	CC(C1CCN(Cc2c(Cl)ccc(O)c2Cl)CC1)N1CCN(C)CC1	87.2	-24.4777	46.325
DDD01027830	COc1ccc(CC(C)(O)CNC(=O)c2cccs2)cc1	89.1	-37.1933	50.2112
DDD01065334	Oc1ccc(cc1)C1CCN(CC1)C(=O)c1ccc(nc1)-n1cccn1	75.1	-40.3333	30.1828
DDD01067851	Cc1ccc(cc1NCC(=O)Nc1cc(F)ccc1F)-n1cnnn1	72.3	-43.7	39.5706
DDD01249603	Cc1nc(CCN)cc(n1)N1CCC(O)(CC1)c1ccc(Cl)cc1	91.7
DDD01255740	CCOc1ccc2ccccc2c1CNCC1CCNCC1	91.6
DDD01078429	CS(=O)(=O)N1CCC(CC1)Nc1ccnc2ccc(Cl)cc12	88.6
DDD01255098	C=Cc1ccc(CN2C(=O)C3(CCNCC3)Nc3ccccc23)cc1	87.7
DDD01253667	NCC1Cc2cc(Oc3cc(F)c(CN4CCCC4)c(F)c3)ccc2O1	77.8
DDD01029263	Cc1cccc(CN2CCC3(CCN(CC3)c3ncccn3)C2=O)c1	76
DDD01297189	C(NC1CCCN(C1)c1cccnn1)c1nnc(o1)-c1ccccc1	75.8
DDD01297268	COc1ccc(OC)c(CNCc2ccnc(c2)N2CCCCC2)c1	75.8
DDD01296506	COc1cc(CNC(c2nccn2C)c2ccccc2)cc(OC)c1	75.5
DDD01076994	FC(F)(F)c1cccc(c1)C1(CNCc2cc[nH]c2)CCOCC1	75.1
DDD01296580	CCCC1CCCN(Cc2csc(n2)-c2ncccn2)CC1	74.9
DDD01029264	CN(C)[C@@H]1CCN([C@H]1Cc1ccccc1)C(=O)c1cc(C)on1	74.4
DDD01297261	COc1ccc(CNCc2ccnc(c2)N2CCCC2)c(OC)c1	73.6
DDD01297828	C(N1CCc2cncnc2C1)c1nc(no1)-c1cccnc1	72.9
DDD01029007	CN(C)CCN1CCC2[C@@H]1CCN2Cc1ccc2OCOc2c1	72.5
DDD01298041	Cc1cnn(CCNCc2csc(n2)-c2ccsc2)c1	72.3
DDD01297478	C(NCc1nc(no1)-c1cccs1)C1CCCN1c1cccnn1	72.2
DDD01298122	CC(C)c1nn(C)c(N2CCOCC2)c1CNCc1csc(C)n1	71.7
DDD01304012	Cc1cnn(CCNCc2ccccc2OCc2cccnc2)c1	71.5
DDD01298021	Cc1cnn(CCNCc2csc(n2)-c2ncccn2)c1	71.5
DDD01296570	CCC1=NOC(C)=C1C(=O)NCC(N(C)C)C1=CC=C(C)C=C1	71.4
DDD01070768	CC(CNC(=O)c1cc(Cl)ccc1I)N1CCCC1	71.1
DDD01297864	CC(C)c1nc(CNCC2CCCN2c2cccnn2)cs1	71.1
DDD01038064	CN(C)CCNC(=O)CCn1ncc2c(Cl)cccc12	71

## Sheet: Set 2
Molecule Name	SMILES	Synonyms	CDD P. falciparum Luciferase Dd2 Single Point Reconfirmation (96hr) (n=3; 1.25μM): Luminescence inhibition (%)	CDD P. falciparum Luciferase Dd2 Single Point Reconfirmation (96hr) (n=3; 1.25μM): Standard deviation (±)	CDD P. falciparum Luciferase 11pt dose response (48hr, n=2): IC50 (μM)	CDD P. falciparum Luciferase ABS 11-pt Reconfirmation Dose Response (48hr): Maximum inhibition (%)	CDD P. falciparum Luc 11pt dose response (96hr, n=2): IC50 (μM)	CDD P. falciparum Luciferase ABS 11-pt Reconfirmation Dose Response (96hr): Maximum inhibition (%)	CDD P. falciparum Sybr Green I ABS Dd2 Dose Response: IC50 (uM)	CDD P. falciparum Sybr Green I ABS Dd2 Dose Response: Maximum measured (%)
UCSD-0841320	O=C(Nc1ccc(OC2CCCC2)cc1)C1CCCN1c1nccs1	DDD01297375	66.4	5.0319	> 10	50	0.03718	94.7	> 12.5	45.3		Set2 includes 3642 GHCDL compounds received later than the initial primary screened set. All were tested in single point triplicate at 1.25μM, and those averaging >50% inhibition were qualified for 11-point dose response reconfirmation.
UCSD-0798151	C1CN(CCC1c1csc(Nc2cnccn2)n1)c1ncccn1	DDD01056714	78.8667	6.55464	0.0592	82.6	0.0286	94.8	> 4.16	55.9
UCSD-0786410	CN(C)CCCNCCC(Cc1ccccc1)C1CCOC(C)(C)C1	DDD01026664	83.5	1.75214	0.405	98.1	0.11	101	0.251	98.8
UCSD-0835554	CN(Cc1ncc[nH]1)c1nc(nc2CCNCCc12)-c1ccccn1	DDD01254777	69.3667	7.21965	10.2	65.1	0.214	94.2	> 4.16	65.7
UCSD-0831926	CCCn1nccc1C(=O)N1CCN(CC1)C1CCc2ccccc2C1	DDD01251134	81.8	0.608276	0.205	95.3	0.224	100	> 12.5	56.3
UCSD-0843402	COc1cc(cc(OC)c1Br)C(=O)NCc1ccc2N(C)CCCc2c1	DDD01300030	89.3	0.1	5.74	71.9	2.46	97.6	> 12.5	52.5
UCSD-0825082	CNc1nc(C)c(s1)-c1nc(no1)-c1c(C)ncc2CNCCc12	DDD01244276	70.3	1.53948	0.956	99.1	0.337	100	1.65	99.6
UCSD-0833341	CC(Cc1ccsc1)NC1CCN(CC1)c1cc(C)nc(N)n1	DDD01252553	67.2	6.86367	1.11	100	0.246	101	1.01	98.9
UCSD-0789024	CC(C)C[C@H](N)C(=O)N1CC2(CCNCC2)c2cc(Cl)ccc12	DDD01029528	58.0667	1.10604	1.79	99.3	0.553	100	1.52	99
UCSD-0845610	COc1ccc(CNCC2CCN(CC(C)O)CC2)c2ccccc12	DDD01302860	60.5667	3.66652	1.27	96.6	0.621	99.6	0.743	96.3
UCSD-0800469	CCOC(=O)C1(Cc2ccccc2-c2ccccc2OC)CCNCC1	DDD01059034	73.0667	3.25781	5.11	55.2	0.861	86.8	> 4.16	59.7
UCSD-0798252	CC(C)NC(=O)C1(Cc2ccccc2-c2ccc(C)cc2)CCCNC1	DDD01056815	73.9667	15.8664	> 4.16	47.9	0.863	84.8	> 4.16	47.9
UCSD-0839860	C(CN1CCN(CC1)c1ccc2nncn2n1)Cc1ccccc1	DDD01295523	62.2	2.16564	3.86	80.4	0.912	99
UCSD-0786409	CN(C)CCCNCCC(C1CCOC(C)(C)C1)c1ccccc1	DDD01026663	50.7333	4.79305	2.82	93.1	0.627	99.6	> 1.39	95.9
UCSD-0839460	C1COC(CN1)c1ccc(cn1)-c1ccccc1	DDD01270216	71.7333	1.74738	1.77	90.2	1.44	92.2	> 12.5	37.1
UCSD-0800215	CN(C)CCNC(=O)c1sc2ccccc2c1C1CCC(CN)CC1	DDD01058779	55.2	10.437	1.31	96.5	2.3	97.5	1.65	97.9
UCSD-0795358	O=C(Nc1ccccc1)C1=CC2(CCNCC2)c2ccccc12	DDD01036191	15.6433	45.1741
UCSD-0833919	CCC(NS(=O)(=O)c1ccc(cc1)C(=O)NC1CC1)c1cnn(C)c1	DDD01253134	17.6267	40.6597
UCSD-0795445	CC(C)CN1CCC2(CCN(Cc3ccsc3)CC2)C1=O	DDD01036278	20.8767	35.9766
UCSD-0795361	COCCN1C[C@@H]2CN(Cc3cccc(C)n3)C[C@@H]2C1=O	DDD01036194	23.743	32.5885
UCSD-0795367	COCCC(=O)N1C[C@H]2CN(Cc3cccc(C)n3)C(=O)[C@H]2C1	DDD01036200	11.5033	42.4558
UCSD-0795352	CC[C@@H]1N(Cc2ccsc2)CCC[C@]11CCC(=O)N1CCOC	DDD01036185	22.98	32.8435
UCSD-0795365	Fc1cccc(CN2C(=O)CCC22CCN(CC2)C(=O)c2ccco2)c1	DDD01036198	10.6967	43.627
UCSD-0795430	C(N1CCC2(C1)CCCN(C2)c1ccccn1)c1nccs1	DDD01036263	14.6833	38.899
UCSD-0830713	C\C=C(/C)CN1C[C@H](NC(=O)c2cc[nH]c2C)[C@H](C1)C1CC1	DDD01249917	8.5	46.4168
UCSD-0795429	CN(C)CCN1CCCC11CCN(CC1)C(=O)c1cccnc1	DDD01036262	15.8533	37.1905
UCSD-0832034	COc1cccc2CN(Cc3c[nH]nc3C(O)=O)CCCOc12	DDD01251242	11.7767	44.7677
UCSD-0826403	COc1c(F)cc(CN2CCC3(CN(C)C(=O)O3)CC2)cc1Cl	DDD01245598	3.73333	47.6296
UCSD-0795437	Cc1nc(CN2CCC3(CC2)NC(=O)CC3c2ccccc2)cs1	DDD01036270	2.56667	47.7847
UCSD-0795374	COCCO[C@H]1CCN([C@H]1Cc1ccccc1)C(=O)c1cc(C)on1	DDD01036207	9.56667	41.5996
UCSD-0795440	CN1CC2(CC1=O)CN(Cc1ccccn1)CCN(C2)C(C)=O	DDD01036273	9.16667	40.5327
UCSD-0795427	CC(C)C(=O)N1CCC2(C1)CCCN(CCOc1ccccc1)C2	DDD01036260	20.79	31.8844
UCSD-0839267	CCn1ncc(Br)c1CN(C)S(=O)(=O)c1ccc(C)cc1	DDD01259521	47.5333	6.20833
UCSD-0835593	Cc1[nH]ccc1C(=O)N[C@H]1CN(CCO)C[C@@H]1C1CC1	DDD01254816	16.1	37.5501
UCSD-0800304	COc1ccc(CNC(Cc2ccsc2)c2ccc(C)cn2)c(OC)c1	DDD01058868	41.1333	12.9423
UCSD-0823924	O=C(NCCCN1CCOCC1)c1ccn(n1)-c1ccc2ccccn12	DDD01085308	40.0333	10.8868
UCSD-0823654	CCN1C[C@H]2[C@@H](C1)N(CC[C@@H]2OC)S(=O)(=O)c1ccccc1F	DDD01085035	30.5667	17.96
UCSD-0823541	CCc1ccc(CN2CCC3(CC(CO3)N3CCN(C)CC3)CC2)cc1	DDD01084920	40.7667	8.4949
UCSD-0829026	CCc1nn(C)c(Cl)c1CN1CCN(CC1)c1ccc(cn1)C(N)=O	DDD01248228	14.08	31.9737
UCSD-0800289	Clc1cccc(C[C@@H]2NCCC[C@@H]2Nc2cccc(Cl)c2)c1	DDD01058853	37.3	17.4078
UCSD-0786405	CN(C)CCNCCC(C1CCOC(C)(C)C1)c1ccccc1	DDD01026659	45.7	3.55949
UCSD-0823999	COCC1CC2(CN1C(C)C)CCN(Cc1ccc(OC)cc1)CC2	DDD01085383	36.0333	12.1022
UCSD-0803946	COc1ccc(CN(C)Cn2cc(C)n(-c3cc(C)on3)c2=O)cc1	DDD01062702	22.9667	24.8011
UCSD-0799906	Cc1cccc(c1)C1(O)CCN(Cc2ccccc2N2CCCC2)CC1	DDD01058470	36.2333	16.759
UCSD-0798998	CN(C)[C@@H]1CN(Cc2ccccc2O)C[C@H]1c1cn(C)c2ccccc12	DDD01057561	38	15.436
UCSD-0824174	Cc1[nH]c2ccccc2c1-c1ccnc(NCCN2CCCCC2)n1	DDD01235893	40.5667	7.00595
UCSD-0798516	Cc1nn(C)cc1CN1CCCC1c1cccc(Nc2nccs2)n1	DDD01057079	29.23	23.2363
UCSD-0794749	CSc1nc2n(ncc2c2=NCCCn12)-c1cccc(Cl)c1	DDD01035434	29.2667	16.2174
UCSD-0799914	OC1(CCN(Cc2ccccc2N2CCCC2)CC1)c1ccccc1F	DDD01058478	37.3667	13.1622
UCSD-0800483	Cc1nc(sc1C)C(Cc1ccsc1)NCc1cccc(C)n1	DDD01059048	35.0333	10.1569
UCSD-0798640	CCC(CN1CCCCC1)NC(=O)C1(CC1)c1cccc(F)c1	DDD01057203	37.3	7.02922
UCSD-0792141	O=C(N1CCN(Cc2cccnc2)c2ncccc2C1)c1cnccn1	DDD01032645	24.6067	19.3932
UCSD-0801190	CN1CCN(CC1)C(=O)C1CCCN(C1)c1cccnn1	DDD01059755	40.2667	4.81906
UCSD-0823936	CN(Cc1ccco1)[C@@H]1CN(Cc2ccc(F)cc2)C[C@@H]2CCCO[C@H]12	DDD01085320	40.7333	3.32466
UCSD-0801325	COc1ccc(cc1O)C1Nc2cc(Cl)ccc2C2=NCCN12	DDD01059890	34.2	8.77439
UCSD-0786394	CCNCCC(Cc1ccccc1)c1ccco1	DDD01026634	32.5667	10.3016
UCSD-0801327	COc1ccc(cc1CO)C1Nc2cc(Cl)ccc2C2=NCCN12	DDD01059892	36.0667	6.70398
UCSD-0839503	CC(C)(N)C(=O)N1CCCC1c1cncc(Oc2ccc(F)cc2)n1	DDD01270259	33.1667	8.68581
UCSD-0798658	Cc1nn(C)cc1CN1CCN(CC2(CC2)c2ccc(C)cc2)CC1	DDD01057221	27.6233	21.8844
UCSD-0798028	COc1ccc(OC)c(CN(Cc2ccco2)Cc2[nH]cnc2C)c1	DDD01056591	13.2	29.0605
UCSD-0802609	NC(=O)C1(Cc2ccccc2-c2ccccc2)CCCN(CC2CC2)C1	DDD01061174	38.7333	4.03774
UCSD-0785914	CCN(CC)CCNC(=O)CCc1c(C)nn(c1C)-c1cccc(Cl)c1	DDD01026101	26.7433	19.276
UCSD-0788790	CN(C)CC(=O)N1CC2(C1)CCN(Cc1ccccc1)C2	DDD01029294	18.73	19.2514
UCSD-0795377	NCC1[C@@H]2CN(Cc3ccccc3)C[C@H]12	DDD01036210	28.2533	20.0911
UCSD-0795313	Cc1ccc(cc1)N(CC(=O)c1ccc(Br)cc1)C1=NCCCCC1	DDD01036146	39.2	1.15326
UCSD-0791648	Cc1nccc(n1)[C@H]1C[C@@H]2CCN(C[C@H]2O1)S(=O)(=O)C1CC1	DDD01032152	18.0067	19.6445
UCSD-0798991	Cc1nc[nH]c1CN(Cc1ccc(F)cc1)C1CC(C)(C)NC(C)(C)C1	DDD01057554	17.9333	26.8217
UCSD-0785431	CN1CCC(CC1)N1CC[C@@H](C1)c1nc2ccc(cc2[nH]1)C(F)(F)F	DDD01025582	23.1833	18.031
UCSD-0786407	CN(C)CCNCCC(C1CCOC(C)(C)C1)c1ccc(C)cc1	DDD01026661	28.7	10.2591
UCSD-0801324	COc1cc(ccc1O)C1Nc2cc(Cl)ccc2C2=NCCN12	DDD01059889	34.9667	3.38575
UCSD-0802988	COC(=O)c1ccc(Cn2nc(C)cc2C)cc1	DDD01061570	23.38	14.9806
UCSD-0825199	CCn1cc(CN2CCC(CN3CCCCC3)CC2)cc1C#N	DDD01244393	30.1333	8.73747
UCSD-0795433	Cc1cccc(CN2[C@H]3CCN(CC4CC4)[C@H]3CC2=O)n1	DDD01036266	1.87	32.7887
UCSD-0835568	CC(C)C1CN(CCCN1CC1CC1)C(=O)Cc1c(C)[nH]c(=O)[nH]c1=O	DDD01254791	22.29	14.5717
UCSD-0826001	CCc1nnc(CNC(=O)CCC2CCCN(C)C2)s1	DDD01245196	25.2333	9.45216
UCSD-0823822	O=C1CC2(CCN(Cc3ccccn3)C2)CN1c1cncnc1	DDD01085205	25.0667	9.41187
UCSD-0802556	CC(=O)Nc1nc(cs1)C1CCN(CC1)C(=O)c1cccnc1	DDD01061121	34.1333	2.5482
UCSD-0798133	CN(C)c1ncc(-c2ccc(F)cc2)c(n1)C1CNCCO1	DDD01056696	13.5667	34.1734
UCSD-0798992	Cc1nc[nH]c1CN(Cc1ccccc1F)C1CC(C)(C)NC(C)(C)C1	DDD01057555	19.8367	15.8481
UCSD-0823533	Cn1ccc(n1)C(=O)N1CCC[C@]2(C[C@H](CO2)OCc2ccccn2)C1	DDD01084912	16.5433	16.5042
UCSD-0823584	CN(C)C(=O)[C@@H]1C[C@@H]2CCN(Cc3nccs3)C[C@@H]2O1	DDD01084964	25.7	8.54225
UCSD-0823871	CC(C)N1CCO[C@H]2CN(C[C@@H]12)C(=O)c1ccc(cc1)N(C)C	DDD01085255	26.9333	7.75005
UCSD-0786439	Clc1ccc(C2Nc3nonc3NC3=C2C(=O)CCC3)c(Cl)c1	DDD01026726	19.9333	12.6152
UCSD-0831009	CC1=C(CCN2CCCC(O)C2)C(C)(C)CCC1	DDD01250214	25.0333	9.0633
UCSD-0797956	NC(=O)CN1CCC(CC1)c1csc(Nc2cnccn2)n1	DDD01056519	10.4667	33.6096
UCSD-0798895	Cc1ccnc(n1)C1CN(Cc2cnn(c2)-c2ccccc2C(O)=O)C1	DDD01057458	10.4333	26.1324
UCSD-0823580	CN(C)CC(=O)N1CC2(CCNCC2)c2cc(C)ccc12	DDD01084960	28.9	5.6
UCSD-0795431	CN(C)C(=O)CN1C(=O)CCC11CCN(Cc2cccn2C)CC1	DDD01036264	14.01	16.5229
UCSD-0789430	CN(C)C(=O)COC[C@@]12CCC[C@@H]1CN(C2)C1CCCC1	DDD01029934	19.03	18.1102
UCSD-0834021	OC(=O)[C@@H]1CN(C[C@H]1C1CC1)C1CCOCC1	DDD01253236	14.2033	19.6243
UCSD-0802440	Nc1cc(CCC2CN(Cc3ccc4cc[nH]c4c3)CCO2)ccn1	DDD01061005	20.7	10.6151
UCSD-0798026	COc1cccc(CN(Cc2ccco2)Cc2cnc(C)n2C)c1	DDD01056589	19.7933	14.9992
UCSD-0798027	COc1cccc(CN(Cc2ccco2)Cc2ncc[nH]2)c1	DDD01056590	20.5933	16.7802
UCSD-0823762	COc1ccc(CN2C[C@H]([C@H]3OCCC[C@@H]23)N(C)Cc2ccco2)cc1	DDD01085144	21.9	8.39107
UCSD-0824251	CC[C@H](C)[C@H](N)C(=O)N1Cc2nc(NCc3ccccc3)sc2C(=O)C1	DDD01235970	23.9	8.41487
UCSD-0790740	OCC(=O)N1CC2(C1)CCN(C2)c1ccccc1	DDD01031244	17.8767	12.2322
UCSD-0799697	Fc1ccc(cc1)-c1cnc(cn1)C1CCNCC1	DDD01058261	11.0667	21.3956
UCSD-0789196	CN1CCO[C@@H]2CN(C[C@@H]2C1)C(=O)COc1cccc(Cl)c1	DDD01029700	16.3	14.5041
UCSD-0785915	CCN(CC)CCNC(=O)CCc1c(C)nn(c1C)-c1ccc(Cl)cc1	DDD01026102	21.0133	15.1562
UCSD-0794891	CCc1nn(c(N)c1C#N)-c1cc(Oc2cccc(C)c2)nc(C)n1	DDD01035617	23.4	9.83056
UCSD-0836631	CCC[C@H]1CN(Cc2cc(C#N)n(C)c2C)C[C@@H]1NS(=O)(=O)CC	DDD01255859	13.8	14.5099
UCSD-0797947	COCC(=O)NC(Cc1cc(nc(n1)C1CC1)N(C)C)c1ccccc1	DDD01056510	19.5	9.87472
UCSD-0825324	CN(C[C@H]1CC[C@@H](Cc2ccc3n(C)ncc3c2)O1)C1CCN(C)CC1	DDD01244518	22.1333	7.8831
UCSD-0832012	Oc1cccc(CN2C[C@@H]3CC[C@H]2CN(Cc2ccc(F)cc2)C3)c1	DDD01251220	25.0333	6.21396
UCSD-0823883	CN(C)CC1CN(Cc2ccsc2)Cc2nccn2C1	DDD01085267	14.1867	14.1435
UCSD-0823991	Cc1ccc(cc1C)C(=O)N1Cc2c(CN3CCCCC3)nn(C)c2C1	DDD01085375	12.9333	16.8542
UCSD-0823655	COCCN1CCC2(C1)CCCN(C2)c1ncccn1	DDD01085036	24.3333	6.83837
UCSD-0789751	CCN(CC)[C@@H]1CN([C@@H]2CCCO[C@H]12)C(=O)c1ccc(cc1)C#N	DDD01030255	11.4763	15.9087
UCSD-0801182	CCCn1ccnc1CN1CCCC1c1cccc(n1)-n1ccnc1	DDD01059747	20.03	12.6889
UCSD-0799895	CN(C)CCN(Cc1ccnn1C1CCCCO1)Cc1ccccn1	DDD01058459	21.64	13.181
UCSD-0790824	CC(C)N1[C@H](Cn2cccn2)C[C@@H]2CN(CC[C@H]12)C1CCOCC1	DDD01031328	18.6633	10.757
UCSD-0834906	CCCc1cncnc1N1CCC(CC1)NCc1cc2ccccc2[nH]1	DDD01254125	20.0667	8.23731
UCSD-0802519	CC(=O)N1C[C@H]([C@@H]2CN(Cc3ccccc3C)CC[C@H]12)c1ccsc1	DDD01061084	17.43	12.3398
UCSD-0805747	OC(=O)c1ccn(n1)-c1ccccc1NC(=O)c1ccccc1Cl	DDD01064731	20.3333	8.14514
UCSD-0790783	OCCC(=O)N1CC2(C1)CCN(C2)c1ccccc1	DDD01031287	21.5667	6.59874
UCSD-0846384	Cn1ncc(NCc2cc(F)cc(F)c2)c(Cl)c1=O	DDD01303863	10.7	24.1336
UCSD-0823821	Cn1ccnc1CN1CCC2(C1)CN(C(=O)C2)c1cncnc1	DDD01085204	13.1573	14.7616
UCSD-0790821	COCCN1CCC2(C1)CCCN(C2)c1ncc(F)cn1	DDD01031325	23.4667	7.01166
UCSD-0791228	CC(C)n1nc(Cn2cccn2)c2CN(Cc12)C1CCOCC1	DDD01031732	15.1433	11.6609
UCSD-0847340	CC(C)(C)C(O)CN1CCN(CC1)C(=O)c1cccc2ncccc12	DDD01305076	16.0533	13.0721
UCSD-0785796	CS(=O)(=O)c1ccc(cc1)-c1ccccc1C(O)=O	DDD01025983	5.73333	32.646
UCSD-0795376	OC(=O)c1ccc2ccc(N3CCN(CC4CC4)CC3)n2c1	DDD01036209	-8.45333	42.5397
UCSD-0826701	C[C@@H]1CN(CCC(=O)NCc2ccccc2Cl)CC[C@@]1(O)C1CCC1	DDD01245896	21.1	6.48383
UCSD-0836012	Cc1nccn1CC1CCCN(Cc2ccc(cc2)-c2cccnc2)C1	DDD01255237	13.0333	15.3578
UCSD-0791649	CNC(=O)N1CCC2(CC[C@]3(CN(C[C@@H]23)S(C)(=O)=O)C(=O)NC)CC1	DDD01032153	6.28667	19.1017
UCSD-0795359	O=C(N1CCC2(CC1)C(=O)N(CC1CC1)c1ccccc21)c1ccno1	DDD01036192	6.74533	19.0811
UCSD-0792390	CCc1cnc(nc1)N1C[C@@H]2C[C@@H]([C@H](C1)O2)C(=O)NC1CCC1	DDD01032894	8.70667	18.0637
UCSD-0823827	O=C(C1CCOC1)N1C[C@@H]2CN(Cc3ccccn3)C[C@@H]2C1	DDD01085210	0.553333	25.3999
UCSD-0785965	O=C(N(CCC#N)CC1CCCO1)c1ccsc1	DDD01026152	9.4	29.2317
UCSD-0791937	CCN1CCn2c(C)cnc2C11CCN(CC1)C(=O)COC	DDD01032441	20.9333	6.05007
UCSD-0786406	CN(C)CCNCCC(Cc1ccccc1)C1CCOC(C)(C)C1	DDD01026660	25.3667	1.96554
UCSD-0803113	COc1c(CNCCc2c[nH]c3ccccc23)c(nn1C)C(C)C	DDD01061746	16.3467	10.6265
UCSD-0790002	CC(C)N1CCn2c(COCC3CCOCC3)cnc2C1C	DDD01030506	5.895	19.0661
UCSD-0823761	O=C(CC1CC1)N1CCC2(CC1)CN(CCO2)c1ncccn1	DDD01085143	6.505	18.6461
UCSD-0587146	CN1CCCC1CNC(=O)CCCOC1=CC=C(Br)C=C1	DDD01298015	15.2267	11.1273
UCSD-0837174	Cc1ncn(c1C)-c1cc(nc(C)n1)N1CCN(CC1)S(C)(=O)=O	DDD01256409	8.73333	23.7285
UCSD-0833975	COc1ccc(F)c(CN2CCCC(O)(CNCc3ccoc3)C2=O)c1	DDD01253190	8.93	16.1033
UCSD-0796420	CC(C(=O)NC1CCN(C)CC1)n1nc(c(Cl)c1C1CC1)C(F)(F)F	DDD01037284	22.8	6.3
UCSD-0798999	CN(C)[C@@H]1CN(Cc2ccc(O)cc2)C[C@H]1c1cn(C)c2ccccc12	DDD01057562	22.4333	4.37531
UCSD-0792472	O=C([C@H]1CN(Cc2cccnc2)C[C@H]2OCC[C@@H]12)N1CCCO1	DDD01032977	9.44	15.2021
UCSD-0790410	COc1cccc(CC(=O)N2CC[C@@H]3NC(=O)CC[C@H]23)c1	DDD01030914	13.9733	11.1876
UCSD-0797955	Cc1cc(C)nc(n1)N1CCC(CC1)c1cccc(CCC(O)=O)n1	DDD01056518	4.76667	20.5578
UCSD-0790369	O=C([C@H]1C[C@H]2OCC[C@H]2N(CC2CC2)C1)N1CCCC1	DDD01030873	4.94667	19.5297
UCSD-0831666	O=C(CCc1cc2CN(CCCn2n1)C(=O)c1ccncc1)NC1CC1	DDD01250873	11.0067	16.4344
UCSD-0839441	Cc1cnccc1CN1C[C@@H](O)[C@@H](C1)Oc1ccccc1	DDD01270197	9.54	15.6988
UCSD-0785458	O=S(=O)(NC[C@H]1C[C@@H]2CCN1C[C@@H]2CN1CCCCC1)c1ccccc1	DDD01025609	24.6333	2.66521
UCSD-0824239	CNCC(=O)Nc1ccc(cc1)-c1cnc(NCCS(C)(=O)=O)nc1	DDD01235958	14.6367	12.3294
UCSD-0841127	CC(C(=O)Nc1ccc(nc1)N1CCCC1)n1cccn1	DDD01297118	-0.9	23.9633
UCSD-0824047	CN1CCCn2c(C1)nc(CNC(=O)c1ccsc1)cc2=O	DDD01085431	18.66	12.0408
UCSD-0823595	Cc1nc(CN2C[C@@H]3CN(C[C@@H]3C2=O)C(=O)c2ccnnc2)cs1	DDD01084975	1.52667	27.6765
UCSD-0791856	O=C(NCC1CC1)[C@@H]1CCO[C@@H]2CCN(CCc3ccccc3)C[C@@H]12	DDD01032360	10.7	21.4502
UCSD-0823897	CC(=O)N1CCC2(C1)CCN(CC2)C(=O)c1ccc(Cl)c(c1)C(F)(F)F	DDD01085281	11.0067	17.0112
UCSD-0800191	COc1ccc(CNC(Cc2ccsc2)c2ccc(C)cn2)cc1OC	DDD01058755	14.48	16.2919
UCSD-0823648	CC(=O)N1CC[C@@H]2CN(CCO[C@@H]2C1)C(=O)c1ccco1	DDD01085029	13.5567	14.7167
UCSD-0844414	COc1ccc(NC(=O)N2CCCC2c2ccncc2)cn1	DDD01301303	9.61	14.3871
UCSD-0845542	O=C(N1CCCC(C1)n1ccnc1)c1ccc(OCC2CC2)nc1	DDD01302766	19.6333	7.77453
UCSD-0795356	CN1CCC2(CC1)C(=O)N(CC1CC1)c1ccccc21	DDD01036189	20.0667	6.27721
UCSD-0823646	COc1ncccc1CN1CCn2c(Cn3cncn3)cnc2C1	DDD01085027	3.30333	19.9683
UCSD-0823471	Cn1cnc(c1)-c1cc(C(=O)N2CCOCC2)c2ccccn12	DDD01084850	18.9767	8.45084
UCSD-0824075	CNCC[C@H]1CC(C)(C)Oc2ccc(C)cc12	DDD01235794	20.8667	5.06491
UCSD-0801415	Cc1ccc(cc1)S(=O)(=O)N1C[C@H]2C[C@H](NC(=O)c3cnn(C)c3)[C@H]2C1	DDD01059980	24.3	0.953939
UCSD-0611832	CN1CCN(CCNC(=O)C2=C(C=CS2)C2CC2)CC1	DDD01064739	9.40333	14.9633
UCSD-0791064	CN(Cc1ccncc1)C1CC2(C1)CCN(CC2)C(=O)c1ccnnc1	DDD01031568	7.78267	15.2448
UCSD-0798123	O[C@@H]1CN(C[C@H]1N1CCCC1)C(=O)c1cc2cccc(F)c2[nH]1	DDD01056686	-0.553333	24.4128
UCSD-0823766	COCCO[C@H]1CCN([C@H]1Cc1ccncc1)C(=O)c1ccc[nH]1	DDD01085148	14.2367	15.1658
UCSD-0825761	CCN(CC)Cc1cc(C(=O)N2CCCC(CC)(C2)C(O)=O)c(C)o1	DDD01244956	8.48667	16.6108
UCSD-0798021	Cc1cc2OC3(CCN(CC(=O)N4CCOCC4)CC3)C=Cc2cc1C	DDD01056584	17.18	10.4105
UCSD-0798697	CC(C)NC(=O)[C@@H]1CN(C)C[C@]11COc2ccc(F)cc2C1=O	DDD01057260	11	19.903
UCSD-0823893	Cc1ncccc1NC(=O)C1=NOC2(CCN(Cc3nccs3)C2)C1	DDD01085277	11.5317	12.344
UCSD-0790331	COc1cccc(CCN2C[C@H]3CCNCC[C@H]3S2(=O)=O)c1	DDD01030835	13.5267	13.6729
UCSD-0845603	CN(CC(=O)N1CCC(CC1)c1nc(C)no1)c1ccc(Cl)cn1	DDD01302852	11.1667	17.1351
UCSD-0801503	COCC(=O)N1CCCC(C1)c1noc2nc(C)cc(c12)C(F)(F)F	DDD01060068	9.41	13.0762
UCSD-0824329	CCCn1cc(c(C)n1)-c1ccnc(NC2CCc3ccccc3C2)n1	DDD01243522	14.8067	13.8568
UCSD-0798817	CCC1CCCCN1C(=O)Cn1nc(cc(N)c1=O)-c1cc(C)oc1C	DDD01057380	-1.084	25.9685
UCSD-0802552	Cc1noc(C)c1-c1cccc(CC2CCN(C2)C(=O)c2cc[nH]n2)n1	DDD01061117	8.79	13.6766
UCSD-0797949	CN1CCCC(C1)c1ccc(cn1)N1CCOCC1	DDD01056512	10	20.6589
UCSD-0802520	CC(=O)N1C[C@H]([C@@H]2CN(Cc3ccccc3Cl)CC[C@H]12)c1ccsc1	DDD01061085	11.24	11.307
UCSD-0823829	O=C(N1CCC2(C1)CCN(Cc1cccs1)CC2)c1cscn1	DDD01085212	9.17333	14.3585
UCSD-0803964	Cc1ccc(cc1)C1CSCCN1C(=O)NCc1cccnc1	DDD01062726	14.21	16.1019
UCSD-0803377	CN(c1cccnc1N1CCCC1)S(=O)(=O)c1cccs1	DDD01062056	12.9467	15.7284
UCSD-0839354	Cc1nc(O)c2nnn(C[C@H]3CCCN3C(=O)c3cccc(F)c3)c2n1	DDD01270110	1.21333	19.8086
UCSD-0811856	COc1ncccc1C(=O)N1CCCC(C1)n1ccnc1C	DDD01071947	7.63667	16.3351
UCSD-0797957	COCC(=O)NCc1ccc(cn1)-c1ccccc1C(O)=O	DDD01056520	3.8	32.4196
UCSD-0798139	CCC(=O)N1CCCCC1c1nc(CN(C)C(C)=O)cc(n1)N(C)C	DDD01056702	-1.39167	26.1922
UCSD-0788203	N#Cc1ccccc1Cn1cncn1	DDD01028707	13.4733	14.7981
UCSD-0786135	CO[C@@H]1CN(c2ccccc2)S(=O)(=O)[C@@]11CCN(C1)C(=O)N(C)C	DDD01026322	-6.02333	28.4227
UCSD-0836115	CC(Cc1ncccc1C)N(C)C(=O)c1cccs1	DDD01255340	13.53	9.22831
UCSD-0824275	Nc1nccc(n1)-c1c[nH]nc1C1CCCCC1	DDD01235994	20.9	2.38956
UCSD-0799518	Cn1cc(CN2CCC(CC2)c2ccncc2)cn1	DDD01058081	-3.93333	23.8022
UCSD-0798502	Cc1cn[nH]c1C1COCCN1Cc1cscn1	DDD01057065	3.01333	20.6009
UCSD-0823647	CC(C)CN1CCC2(CN(C2)c2ncccn2)C1	DDD01085028	11.98	10.4122
UCSD-0829479	CCOCCC(=O)NCC1COc2c(C1)cccc2OC	DDD01248681	11.0867	12.3214
UCSD-0788197	NCc1cnc(Nc2ccccc2)nc1	DDD01028701	6.12333	15.9571
UCSD-0800778	CCC(CN1CCCC1)NC(=O)Cc1c(C)[nH]c2c(C)cc(C)cc12	DDD01059343	18.2333	4.60688
UCSD-0792222	COCCC(=O)N1CCOCC2(CCN(Cc3cccs3)C2)C1	DDD01032726	13.363	12.5059
UCSD-0799085	CC(C)c1nccn1CCC(=O)N1CCCCC1c1ccn[nH]1	DDD01057648	-1.32	26.3211
UCSD-0785839	CCOC(=O)CN1CCC2(CC1)CC(=O)c1ccc3ccccc3c1O2	DDD01026026	8.07	15.035
UCSD-0798982	Cc1cnc(cn1)-c1nc(no1)C1CCN(Cc2ccccc2O)CC1	DDD01057545	7.40667	15.8878
UCSD-0826029	CCOc1ncccc1-c1cc2OCOc2cc1C(N)=O	DDD01245224	13.4773	11.7602
UCSD-0823540	O=C([C@H]1C[C@H]2OCC[C@H]2N(CCc2ccccc2)C1)N1CCCCO1	DDD01084919	4.93333	21.0621
UCSD-0798659	CC(Cc1ccccn1)N(C)Cc1c(C)nn(c1C)-c1ccccc1C	DDD01057222	5	22.0991
UCSD-0798818	CC(C)NC(=O)[C@@H]1CN(C[C@]11Cc2ccccc2C(=O)N1)C(=O)C1CC1	DDD01057381	-0.0666667	25.8748
UCSD-0788950	Cc1ccc(o1)C(=O)N1CCC2(CCC(O2)C(=O)NCC2CC2)CC1	DDD01029454	18	4.26732
UCSD-0823939	CCOCC1CN(Cc2cnn(CC3CCOCC3)c12)S(C)(=O)=O	DDD01085323	-2.06667	21.5373
UCSD-0798730	Cc1ccccc1C(=O)N1CC[C@H](O)[C@H](CC1)N1CCOCC1	DDD01057293	-6.56667	36.4533
UCSD-0790076	CN(C)Cc1nn(C)c2CN(Cc12)C(=O)Nc1cccc(C)c1	DDD01030580	10.0033	14.4303
UCSD-0803962	CCC(C)(C)C(=O)Nc1ccc2ccn(CC(=O)NC)c2c1	DDD01062724	0.533333	25.609
UCSD-0798723	COCCn1c2nc(ccc2c(=O)n(C)c1=O)C1CCN(CC1)C(C)=O	DDD01057286	11.7433	15.3117
UCSD-0799387	CN1CCC(CCc2ccnc(Nc3cnccn3)c2)CC1	DDD01057950	8.26667	23.3693
UCSD-0792468	CCCS(=O)(=O)N1CCC2(C1)CN(C(=O)C2)c1cnn(C)c1	DDD01032973	12.7767	9.58799
UCSD-0823708	CN(Cc1cn2CCN(Cc2n1)c1ncc(F)cn1)Cc1ccco1	DDD01085090	15.65	8.85565
UCSD-0823892	C(C1CC1)N1CC(CN2CCOCC2)Cn2ccnc2C1	DDD01085276	11.1887	10.8942
UCSD-0785338	Fc1ccc(cc1)N1C(=O)N[C@@H]2CCN([C@@H]2C1=O)C(=O)c1ccccc1	DDD01025489	9.96	13.6981
UCSD-0796012	CN(C)Cc1cnc2CCN(Cc3ccsc3)CCn12	DDD01036845	10.7067	12.2203
UCSD-0795425	COc1cccc(CN2CCCC3(CCN(C3)C(=O)[C@H]3CCCO3)C2)c1	DDD01036258	6.24133	14.0356
UCSD-0789506	CCNC(=O)N1CCC2(CCn3c(cnc23)-c2ccccc2)CC1	DDD01030010	2.57333	20.0023
UCSD-0837838	CCc1cc(nc(n1)N(C)C)N1CCC(CC1)NC1CCOCC1	DDD01257075	9.78333	14.4952
UCSD-0800290	CN(C)c1cc(C)nc(n1)C1(C)CCCNC1	DDD01058854	4.56667	25.3086
UCSD-0796528	COc1ccc(cc1)N1CCN(CC1)C(=O)Cn1nc(C)c(Cl)c1C	DDD01037392	5.39	17.8095
UCSD-0801501	Cc1cc(c2c(noc2n1)C1CCCN(C1)C(=O)C1CC1)C(F)(F)F	DDD01060066	-4.92	25.634
UCSD-0788874	O=C(C1CCOC1)N1CCC2(C1)CCNCC2	DDD01029378	9.54333	14.4627
UCSD-0828415	OC(=O)[C@@H]1CN(C[C@H]1C1CC1)C1CCCC1	DDD01247615	5.83333	14.7145
UCSD-0839244	Cc1cc(-n2cnnn2)n2ncnc2n1	DDD01259498	4.46	15.316
UCSD-0807996	O=C(NCCNCc1cccc2OCCCOc12)C1CCCC1	DDD01067327	17.05	8.05962
UCSD-0839353	CN1CCc2nc(nc(N3CCCCC3)c2C1)C1CCCCN1C(C)=O	DDD01270109	10.8367	10.3677
UCSD-0839535	CCc1nccn1-c1cncc(n1)C1CCCN1Cc1cccnc1	DDD01270291	14.17	6.81848
UCSD-0802537	Cc1nnc(Nc2cccc(n2)C2CCN(CCO)CC2)s1	DDD01061102	0.27	18.7516
UCSD-0800010	CN1CCCC(C1)c1cccc(n1)-c1cccc(Cl)c1	DDD01058574	11.9167	12.9358
UCSD-0823469	COCCN1CC[C@@H]2OC[C@@H](C[C@@H]2C1)C(=O)NCc1cccs1	DDD01084848	11.9	9.85038
UCSD-0823774	Cc1cccc(COC[C@H]2CC[C@H]3[C@H](CCN3C(=O)CC3CC3)O2)n1	DDD01085156	8.32333	12.6155
UCSD-0802344	CC(C)(N)C(=O)N1CCC(CC1)c1nccnc1Oc1cccc(F)c1	DDD01060909	13.6553	11.514
UCSD-0826712	C(N1CCC2(C1)CCNCC2)c1ccc(Cn2cccn2)cc1	DDD01245907	16.17	6.56816
UCSD-0823768	C(N1CC[C@]2(C[C@H](CO2)Oc2ccccn2)C1)c1ccccn1	DDD01085150	8.665	11.61
UCSD-0786121	CCOC(=O)[C@H]1[C@H]2CNCCN2C[C@@H]1c1ccccc1	DDD01026308	6.66667	25.0043
UCSD-0785950	CNC(=O)c1cc([nH]n1)-c1ccccc1OC	DDD01026137	-3.38	32.4077
UCSD-0799086	CNc1cncc(n1)C1CCCN1C(=O)CCn1ccnc1C(C)C	DDD01057649	13.1833	7.81734
UCSD-0800122	Cc1c([nH]c2ccc(F)cc12)C(=O)N[C@@H]1CC[C@H]([C@@H]1O)N1CCCC1	DDD01058686	12.44	14.1689
UCSD-0798777	C(N1CCCCC1c1ccc(Nc2cnccn2)nc1)c1cccnc1	DDD01057340	9.16247	11.1049
UCSD-0835463	O=C(N1CCCC1Cn1cccn1)c1cccc2ccnn12	DDD01254686	5.17667	14.6955
UCSD-0798124	CN(C)CC1(O)CCN(C1)C(=O)Cc1ccc2ccccc2c1	DDD01056687	-7.65333	28.4225
UCSD-0798816	Cc1csc2c(nc(C)n12)C1CCN(CCOc2ccc(C)cc2)CC1	DDD01057379	-1.3	32.3042
UCSD-0790120	O=C(N1CCOCC1)c1ncn-2c1CNS(=O)(=O)c1ccccc-21	DDD01030624	9.91	15.2918
UCSD-0839484	CC(C)c1nccn1-c1cccc(n1)C1CCCN(C1)C1CCCC1	DDD01270240	14.9133	8.51954
UCSD-0799525	NCCCC(=O)NCC1(O)CCCN(C1)c1ccnc2cccnc12	DDD01058088	-3.52	22.3354
UCSD-0834466	FC(F)CNCC1(CCOC1)c1ccc(F)cc1	DDD01253683	8.16667	12.6223
UCSD-0823477	COCC(=O)NCc1cc(=O)n2CCCN(Cc3ccsc3)Cc2n1	DDD01084856	5.63	13.4032
UCSD-0800506	CN(Cc1ccnc2ccccc12)C1CCS(=O)(=O)C1	DDD01059071	-3.91667	28.4728
UCSD-0823928	CN(C)[C@@H]1CN(Cc2ccco2)C[C@@H]2CCCO[C@H]12	DDD01085312	18	4.29302
UCSD-0798132	CN(CC1(O)CCN(CC1)c1ccnc2ccncc12)C(=O)CCN	DDD01056695	7.66667	17.6888
UCSD-0799603	CCn1ncc(CN2CCCC(C2)n2c3ccccc3oc2=O)c1C	DDD01058167	2.51	22.471
UCSD-0798117	FC(F)(F)c1cc(C2CCN(CC2)c2cnccn2)n2ccnc2n1	DDD01056680	6.6	20.0502
UCSD-0736138	CC1=C(NCC2=CC(OCC3CCCO3)=CC=C2)N=C2C=CC=CC2=N1	DDD01072875	0.863333	20.9418
UCSD-0790739	CC(=O)N1CCn2c(cnc2C11CCNCC1)-c1cccc(F)c1	DDD01031243	4.76	15.0245
UCSD-0797948	Cc1nnc(s1)N(CCC#N)CCC#N	DDD01056511	-0.836667	26.2501
UCSD-0799070	Nc1nc2OC3(Cc2c(N)n1)CCN(CC3)C(=O)CC1CCCNC1	DDD01057633	5.81667	17.2889
UCSD-0838947	Nc1nccc(n1)N1CCCC(CO)(CCOc2ccccc2)C1	DDD01258185	5.00467	13.8344
UCSD-0799526	O=C(N1CC[C@@H]2NC(=O)CO[C@H]2CC1)c1ccc2CCCCc2c1	DDD01058089	-2.64667	22.6475
UCSD-0789997	Cn1ccnc1CN1CCO[C@H]2C(CNC(=O)c3ccco3)CC[C@H]12	DDD01030501	16.9	3.57631
UCSD-0837528	CCCc1cncnc1N1CCC(CC1)NCCc1nc(O)cc(O)n1	DDD01256764	2.80333	21.677
UCSD-0790742	O=C(N1CC2(C1)CCN(C2)c1ncccn1)c1ccnnc1	DDD01031246	9.58333	11.4918
UCSD-0823881	O=C(N1CC(CN2CCOCC2)Cn2ccnc2C1)c1ccccn1	DDD01085265	7.85	15.7456
UCSD-0823586	CN(C)C(=O)N1CCN(Cc2cnn(C)c2)CC2(CNC(=O)C2)C1	DDD01084966	12.2767	13.7269
UCSD-0799688	CN(C)C(=O)c1cc(C)nc(n1)C1(C)CCCN1c1cc(C)ncn1	DDD01058252	-7.43333	43.4493
UCSD-0802510	CC(=O)N1C[C@H]([C@@H]2CN(CC3CCCCC3)CC[C@H]12)c1ccsc1	DDD01061075	12.13	8.73755
UCSD-0798912	CCOCCN1CCC(CC1)c1cncc(C)n1	DDD01057475	3.77	16.5001
UCSD-0789508	CNC(=O)N1Cc2cc(F)ccc2C2(CCN(C)CC2)C1	DDD01030012	9.09333	11.305
UCSD-0789195	N#Cc1ccc(nc1)N1CC2(C1)CCN(C2)c1nccs1	DDD01029699	15.2833	7.41861
UCSD-0817907	CC(C)CN1CCC(CC1)NC(C)c1ccccc1-n1cccn1	DDD01078904	8.84667	12.3844
UCSD-0798983	Cc1cnc(cn1)-c1nc(no1)C1CCN(Cc2ccccc2C)CC1	DDD01057546	-1.35667	27.9232
UCSD-0835602	CN(Cc1ccncc1C)C(=O)C(C)(C)NC(=O)c1cccs1	DDD01254825	9.77667	11.1036
UCSD-0786200	CNC(=O)[C@H]1[C@H]2CN(Cc3ccccn3)CCN2C[C@@H]1c1ccccc1	DDD01026387	-16.2367	43.0619
UCSD-0798699	CN1C[C@@H](C(=O)NC(C)(C)C)[C@]2(C1)COc1ccc(F)cc1C2=O	DDD01057262	5.6	21.5799
UCSD-0791847	CC(C)N(C)Cc1cnc2CN(Cc3ccc(F)cc3)CCn12	DDD01032351	-5.16667	22.8553
UCSD-0789584	COCCN1CCc2ncc(CN(C)C)n2CC1	DDD01030088	8.6	16.5756
UCSD-0799913	OCCN(Cc1ccncc1)CC1(CCCC1)c1ccc(Cl)cc1	DDD01058477	-3.11333	22.0271
UCSD-0798903	Cc1ccc(nc1)C1CCCN(C1)S(=O)(=O)N1CCOCC1	DDD01057466	-3.7	30.1755
UCSD-0798769	CC(=O)NCC(=O)N1CCOCC(Cc2ccc3n(C)ccc3c2)C1	DDD01057332	2.66667	24.8228
UCSD-0822189	Cc1nc[nH]c1CN1C[C@@H]2OCCN([C@@H]2C1)c1ncccn1	DDD01083563	-0.183333	18.1941
UCSD-0787261	Cc1csc(NC(=O)Cn2nc(C)ccc2=O)n1	DDD01027765	1	16.25
UCSD-0785030	O[C@H]1CC(CNCC2CCCC2)(COc2cccnc2)C[C@H]1O	DDD01025181	4.63333	23.1314
UCSD-0790325	O=C(N1CCCC2(CCC(=O)N2Cc2ccncc2)C1)c1ccoc1	DDD01030829	11.5867	7.33346
UCSD-0798045	Cc1c(nn2c(O)c3CN(Cc3nc12)C(=O)C1CC1)-c1cccs1	DDD01056608	-3.55	29.0154
UCSD-0826652	COc1cccc(-c2nc3CNCCc3[nH]2)c1F	DDD01245847	4.14233	13.9697
UCSD-0821691	CC(C)CN1CCC2(C1)COCc1cnc(nc21)-c1ccccc1	DDD01083061	2.96667	24.1231
UCSD-0794756	CSc1nc2n(ncc2c2=NCCCn12)-c1ccc(Cl)cc1	DDD01035443	8.53933	10.1448
UCSD-0792510	COCC1CN(Cc2c(C)noc2C)Cc2cn(C)nc12	DDD01033015	3.66333	15.1966
UCSD-0794089	CN1CC(=O)N(CC11CCN(Cc2ccsc2)C1)c1cccc(F)c1	DDD01034594	6.17667	15.1482
UCSD-0839530	COc1ncc(c(OC)n1)C1(O)CCN(Cc2ccccc2O)CC1	DDD01270286	10.18	9.16419
UCSD-0798911	Cn1cc(CN2CCC(C2)c2cc(CCO)[nH]n2)cn1	DDD01057474	-0.333333	31.7851
UCSD-0791725	Cc1ccc(cn1)C(=O)N1C[C@H](OCc2cccnc2)[C@H]2COC[C@@H]12	DDD01032229	-0.865333	20.9835
UCSD-0799705	CN1CCC(C1)c1n[nH]cc1-c1ccnc(N)c1	DDD01058269	1.13333	24.3414
UCSD-0823937	COc1ccc(CN2CCC[C@@H]3CN(C[C@H]23)C(=O)c2ccco2)cc1	DDD01085321	15.5567	5.81237
UCSD-0789277	CN1CC2(CCN(CC2)S(=O)(=O)C2CC2)c2ccccc12	DDD01029781	9.73	15.6366
UCSD-0798698	CN1C[C@@H](C(=O)NC2CCCC2)[C@]2(C1)COc1ccc(F)cc1C2=O	DDD01057261	-0.75	19.5776
UCSD-0823710	O=C(NC[C@]12COC[C@H]1CN(Cc1ccncc1)C2)c1ccco1	DDD01085092	6.66333	13.5182
UCSD-0824056	CC(C)NC(=O)N1CCC2(C1)CN(c1ccsc1)C(=O)CN2C	DDD01085440	0.986667	23.809
UCSD-0802585	Cn1cc(CN2CCc3c(C2)nc([nH]c3=O)-c2ccccn2)cn1	DDD01061150	-7.53333	25.2991
UCSD-0799619	Cc1cc(n2nc(cc2n1)C1CCN(CC1)S(C)(=O)=O)C(F)(F)F	DDD01058183	8.5	11.2829
UCSD-0794007	Cc1ncsc1CN1CC[C@H]2OCC[C@]2(C1)C(=O)N1CCCO1	DDD01034512	-3.2	19.4672
UCSD-0792142	CNC(=O)[C@H]1C[C@@H]2CN(C[C@@H]2N1S(C)(=O)=O)C(=O)c1ccc(C)o1	DDD01032646	3.54667	17.8219
UCSD-0828482	Cc1[nH]ccc1C(=O)N1CCC2(CC1)N(CCc1[nH]cnc21)S(C)(=O)=O	DDD01247682	5.42333	12.7944
UCSD-0797940	CNC(=O)[C@@H]1CN(C[C@H]1c1ccnc(n1)N1CCCC1)C(=O)C(C)C	DDD01056503	3.98333	13.9636
UCSD-0789234	O=C(C1CC1)N1CCC2(CC1)CNCc1ccccc21	DDD01029738	2	18.1596
UCSD-0791848	CCN1CCC2(C1)COCc1c(C)nc(nc21)N(C)C	DDD01032352	1.54667	17.1509
UCSD-0817031	O=C(Cn1cc(cn1)-n1cccc1)NCC1CCC1	DDD01077915	6.36667	19.4104
UCSD-0802592	CC(=O)N1CCCC(C1)c1cnc(cn1)-c1c(C)nn(C)c1C	DDD01061157	9.036	9.67234
UCSD-0803007	COC(=O)Cc1cn2cc(ccc2n1)C(F)(F)F	DDD01061589	7.58667	14.5935
UCSD-0810923	Cc1cc(CN2CCN(CC2)C(=O)CCc2cccs2)on1	DDD01070833	7.16667	16.9544
UCSD-0791110	O=S(=O)(NC[C@]12COC[C@H]1CN(CCc1ccccc1)C2)C1CC1	DDD01031614	7.99333	11.715
UCSD-0786108	OC12CCC(CC1)N(Cc1ccc(F)cc1)C2CN1CCOCC1	DDD01026295	4.36667	24.7395
UCSD-0793389	C1CC2(CCN(CC2)c2nncs2)c2ccc(cc12)-c1ccncc1	DDD01033894	10.2833	8.37531
UCSD-0795438	C[C@H]1[C@@H]2CN(Cc3ccsc3)C[C@@H]2CNC1=O	DDD01036271	0.323333	16.719
UCSD-0788536	Cc1ccc(CN2CC3(C2)CCN(C3)S(=O)(=O)c2ccccc2)o1	DDD01029040	11.7133	6.03155
UCSD-0823656	CN(C)[C@@H]1CCN([C@H]1Cc1cnn(C)c1)C(=O)NC1CCCC1	DDD01085037	8.72333	10.0127
UCSD-0799919	COc1cc2OCCOc2cc1CN1CCc2sccc2C1C	DDD01058483	12.21	8.60153
UCSD-0789505	CC(=O)NCC(=O)N1CCc2nc(C)nc(C)c2CC1	DDD01030009	8.72667	10.9581
UCSD-0790082	O=C(NC1CC1)[C@@H]1CN(Cc2ccc3OCOc3c2)C[C@H]2OCC[C@@H]12	DDD01030586	-0.796667	16.814
UCSD-0787450	CCS(=O)(=O)NCC(Cc1cccc(F)c1)N1CCNC1=O	DDD01027954	10.5283	9.92071
UCSD-0707870	CC(C)C1=NN(C)C(N2CCOCC2)=C1CNC(C)C(N)=O	DDD01302676	8.56	9.735
UCSD-0803956	Fc1cccc(c1)C1(CC1)NC(=O)Nc1cccnc1	DDD01062718	8.72433	9.27478
UCSD-0828262	N[C@@H](Cc1c[nH]cn1)C(=O)N1CCC(CC1)Oc1ccc(Cl)cc1	DDD01247462	14.65	5.89428
UCSD-0839534	CC(=O)N1C[C@H]([C@@H]2CN(Cc3cccc(Cl)c3)CC[C@H]12)c1ccsc1	DDD01270290	11.0633	6.63711
UCSD-0801189	N[C@@H]1CCC[C@@H](Oc2ccc(F)cc2Oc2cccc(F)c2)[C@@H]1O	DDD01059754	1.43333	14.9246
UCSD-0785825	Brc1cnc(N2CCCCC2)c(c1)C(=O)NCC1CC1	DDD01026012	-0.773333	23.7438
UCSD-0620169	ClC1=C(CN2CCCC(CN3C=NC=N3)C2)C2=C(C=CC=N2)C=C1	DDD01302271	15	4.2332
UCSD-0800888	CN(C)c1ncc(-c2cccc(F)c2)c(n1)C1CNCCO1	DDD01059453	3.13333	20.4913
UCSD-0827855	CCC[C@H]1CN(C[C@@H]1NC(=O)CCc1cnccn1)C1CCOCC1	DDD01247053	-7.31333	25.5
UCSD-0793693	CCOCC1CN(CC2CC2)Cc2nn(CC3CC3)cc12	DDD01034198	7.58333	12.9538
UCSD-0845555	CC(Nc1cccc(CN2CCOC2=O)c1)C(=O)NC(N)=O	DDD01302786	6.11667	12.19
UCSD-0799920	CN(C)CCN(Cc1ccc(C)o1)Cc1ccnn1C1CCCCO1	DDD01058484	5.23333	18.287
UCSD-0785309	CCNC(=O)N1CC[C@H]2CC(=O)N(CC[C@H]2C1)C1CCCCC1	DDD01025460	-8.83733	32.967
UCSD-0798115	CNC(=O)CCc1cc(nc(C)n1)C1CCCN1C(=O)CO	DDD01056678	5.09667	15.2579
UCSD-0832874	O=C(NCCC1CN(CCO1)C1CCCC1)c1cc(=O)[nH]c(=O)[nH]1	DDD01252084	6.47333	11.2648
UCSD-0790743	COCC(=O)N1CC2(C1)CCN(C2)c1ccccc1	DDD01031247	3.13667	14.6071
UCSD-0789432	O=C(N1CCO[C@@H]2CN(C[C@@H]2C1)c1ncccn1)c1ccccc1	DDD01029936	3.578	13.1857
UCSD-0824000	COC[C@@H]1CC[C@H]2[C@H](CCN2S(=O)(=O)c2ccc(OC)cc2)O1	DDD01085384	1.57	16.9739
UCSD-0800001	COCCC(=O)N1C[C@@H](c2ccccc2F)[C@]2(C1)CCCC(=O)N2	DDD01058565	-1.36233	20.2652
UCSD-0791230	CC(C)n1nc(Cn2cccn2)c2CN(CC3CCOC3)Cc12	DDD01031734	11.6667	5.41022
UCSD-0799516	C(N1CCCC(C1)c1cnccn1)c1ccsc1	DDD01058079	3.6	18.8794
UCSD-0823896	CCCN(CC)C(=O)c1cc2n(C)c3ccccc3c2n1C(=O)N(C)C	DDD01085280	6.22667	12.8857
UCSD-0802697	COc1ccc(Cc2cccc(n2)C2CCN(C)CC2)cc1	DDD01061262	5.625	10.605
UCSD-0792224	COCC(=O)N1CCOCC2(CCN(Cc3cccs3)C2)C1	DDD01032728	-2.92667	18.5077
UCSD-0844733	Oc1cccc(CNCCNC(=O)Cc2cccc(F)c2)c1	DDD01301710	1.94667	13.9473
UCSD-0790827	CCCN1CCC2(C1)N(Cc1ccc(F)cc1)S(=O)(=O)c1ccccc21	DDD01031331	9.74667	8.31291
UCSD-0839483	COc1cccc(c1)S(=O)(=O)N1CCC(O)(CN(C)C)C1	DDD01270239	15.2	2.20681
UCSD-0798140	CCCN1CCC(C1)c1cc(CCOc2ccc(cc2)C(F)(F)F)[nH]n1	DDD01056703	1.63667	18.5099
UCSD-0785835	CN(C)C(=O)CN1CCC2(CC1)CC(=O)c1c(O2)ccc2ccccc12	DDD01026022	-3.73867	23.0801
UCSD-0798125	CN(CC1(O)CCN(CC1)c1cc(C)nc2ccncc12)C(=O)CCN	DDD01056688	-1.27	26.1979
UCSD-0823760	CN(Cc1cccnc1)C1CC2(C1)CCN(CC2)c1ccccn1	DDD01085142	12.3467	4.38002
UCSD-0826488	Cc1cc2ccccc2n1CCC(=O)N1CCCCC1CCO	DDD01245683	6.54333	10.9461
UCSD-0785874	CC(C)CNC(=O)C1OC(=NN1C(C)=O)c1ccco1	DDD01026061	2.92	18.8347
UCSD-0800199	CCN1CCCC1CNCc1cc2cc(C)c(C)cc2[nH]c1=O	DDD01058763	-9.26667	24.6151
UCSD-0785464	COc1ccc(CN2C[C@@H]3OCC(=O)N(Cc4nccn4C)[C@@H]3C2)cc1	DDD01025615	-1.51333	24.0946
UCSD-0786196	OC[C@@H]1CN2CCN(C[C@@H]2[C@H]1c1ccccc1)C(=O)C1CC1	DDD01026383	0.555	16.4508
UCSD-0797941	CNC(=O)[C@@H]1CN(C[C@H]1c1ccnc(n1)N1CCCC1)C(=O)COC	DDD01056504	8.225	8.35365
UCSD-0800872	Cn1nccc1-c1cc(ccn1)C1CCN(CC1)S(C)(=O)=O	DDD01059437	-0.2	27.6592
UCSD-0800002	COCCCN(Cc1ccnn1C1CCCCO1)Cc1ccccn1	DDD01058566	9.51667	11.7699
UCSD-0790081	O=C(NC1CC1)[C@H]1CN(Cc2ccc3OCOc3c2)C[C@H]2OCC[C@@H]12	DDD01030585	0.98	18.3893
UCSD-0798643	CC(C)C(=O)N(C)Cc1nc(ncc1-c1ccncc1)N1CCCC1	DDD01057206	-5.82	25.5349
UCSD-0784980	COc1ccc2nc(C[C@@H]3C[C@@H](C(C)C)[C@H](CN(C)C)C=C3C)[nH]c2n1	DDD01025131	15.6333	1.35031
UCSD-0823478	O=C(N1C[C@@H]2COC[C@]2(COc2cccnc2)C1)C1=CCCC1	DDD01084857	4.568	10.908
UCSD-0792512	CCOCC1CN(Cc2cc(C)on2)Cc2cn(C)nc12	DDD01033017	1.27333	14.6182
UCSD-0798785	Cc1ccnc(n1)C1CN(Cc2ccc(o2)-c2ccccc2C(O)=O)C1	DDD01057348	1.58667	13.5079
UCSD-0790329	O=C([C@@H]1C[C@H]2OCCN(CC3CC3)[C@@H]2C1)N1CCCC1	DDD01030833	-1.15333	15.7647
UCSD-0790782	Fc1cc(F)cc(c1)C(=O)N1CCC2(CC2)CC1	DDD01031286	8.95	10.0527
UCSD-0791066	Cn1cccc1C(=O)N1CCCC2(CCCN2S(C)(=O)=O)C1	DDD01031570	-2.49	17.0103
UCSD-0785903	CN(CCc1ccccc1)C(=O)C1OC(=NN1C(C)=O)c1ccco1	DDD01026090	-13.6667	31.7056
UCSD-0823767	Cc1nc(COC[C@@H]2CC[C@H]3[C@H](CCN3c3ncccn3)O2)cs1	DDD01085149	7.41667	11.8375
UCSD-0816522	CC(=O)N1CCSCC1c1ccc(C)o1	DDD01077350	-4.43333	18.4245
UCSD-0790330	C(N1CCOC2(CCN(CC2)c2ncccn2)C1)c1ccccn1	DDD01030834	5.51	10.7293
UCSD-0798205	C(O[C@H]1CN(C[C@@]11CCCO1)c1ncccn1)c1ccccc1	DDD01056768	3.47333	11.4683
UCSD-0823882	Cc1noc(C)c1CN1CC[C@H]2OCC[C@]2(C1)C(=O)N1CCCO1	DDD01085266	3.89667	15.6152
UCSD-0823479	CN(C)C(=O)N1C[C@@H]2COC[C@]2(CNS(C)(=O)=O)C1	DDD01084858	6.559	8.81446
UCSD-0792431	CC1N(CCn2c(COCc3csc(C)n3)cnc12)C(=O)C1CC1	DDD01032935	-2.83333	16.901
UCSD-0823776	COCCC(=O)N1CC[C@H]([C@@H]1Cc1ccccc1)N(C)C	DDD01085158	4.10667	16.0537
UCSD-0823532	O=C([C@H]1C[C@H]2OCC[C@H]2N(Cc2cccnc2)C1)N1CCCO1	DDD01084911	6.14	12.9041
UCSD-0790745	O=C(Cc1ccccn1)N1CCC2(CC1)CN(CCO2)c1ccccn1	DDD01031249	1.35127	14.6002
UCSD-0825758	OC[C@H]1CN(Cc2c(Cl)cncc2Cl)C[C@H]1CN1CCCC1	DDD01244953	7.62	7.90044
UCSD-0827593	O=C(Cc1c[nH]c(=O)[nH]c1=O)N1CCC2(CC1)CCC(=O)N(C2)C1CC1	DDD01246791	5.02333	11.49
UCSD-0800128	C(Cc1ccncc1)Nc1ncc(-c2cnccn2)c(n1)C1CC1	DDD01058692	-7.71667	33.1518
UCSD-0789503	O=C(N1CCCC1)c1ncn2c(ccnc12)C1CCN(CC2CC2)CC1	DDD01030007	11.5233	8.53338
UCSD-0800874	Cc1cc(nc2nccn12)C1CCCCN1C(=O)c1ccsc1	DDD01059439	8.54	10.8975
UCSD-0798682	OC1CCCOC11CCN(CCCOc2ccccc2F)CC1	DDD01057245	-3.208	21.9726
UCSD-0820649	O=C(CC1CC1)N[C@@H]1CN(C[C@@H]2CCCO[C@H]12)C(=O)c1cccs1	DDD01082005	10.0167	5.88262
UCSD-0823712	Cc1ccc(CN2CCCC3(CCN(C3)S(C)(=O)=O)C2)o1	DDD01085094	-3.15333	19.2627
UCSD-0785897	CC(=O)N1N=C(OC1C(=O)NCCc1ccc(O)cc1)c1ccco1	DDD01026084	-9.1	23.791
UCSD-0799000	Cc1ccc(cc1)S(=O)(=O)N1CC[C@@H]2C[C@H](NC(=O)c3ccncc3)[C@H]12	DDD01057563	-4.73333	18.3903
UCSD-0821527	COCC1CC2(CN1C(C)C)CCN(CC2)c1cccc(C)n1	DDD01082897	0.766667	26.0454
UCSD-0790411	CC(C)CN1[C@@H]2CN(C[C@H]2OCC1=O)C(=O)[C@H]1CCCO1	DDD01030915	3.69333	12.2755
UCSD-0832105	CCCn1ncnc1C(C)NC(=O)C1CCN(CC(N)=O)CC1	DDD01251313	3.44633	11.5132
UCSD-0818944	Cc1cccc(NC(=O)[C@@H]2CCCN2CC(=O)N2CCCCCC2)n1	DDD01080070	14.1667	3.52326
UCSD-0785797	CNC(=O)c1ccccc1-c1ccc(cc1)S(C)(=O)=O	DDD01025984	2.3	24.1622
UCSD-0799604	COc1nc2cc(C)ccc2cc1CN(C)Cc1n[nH]c2CCCCc12	DDD01058168	-6.64667	28.18
UCSD-0823890	COCC(=O)N1CC[C@H]([C@@H]1Cc1ccccc1)N1CCOCC1	DDD01085274	7.74687	8.18811
UCSD-0791771	COCCn1cc2CCOC(CNCc3cccc(OC)c3)c2n1	DDD01032275	-4.73333	34.9689
UCSD-0821457	CN(C)C(=O)CO[C@H]1CO[C@@]2(CCN(C2)S(C)(=O)=O)C1	DDD01082825	0.553333	17.1608
UCSD-0823824	O=C(N1CCC2(CCN(Cc3nccs3)C2)CC1)c1cscn1	DDD01085207	9.21667	6.43718
UCSD-0824122	Cc1ncc(-c2ccnc(NC3CC3)n2)c(n1)-c1cccnc1	DDD01235841	11.69	7.2981
UCSD-0792473	CC(C)NC(=O)[C@@H]1C[C@H]2OCCN(Cc3ccc(C)o3)[C@@H]2C1	DDD01032978	1.69773	13.7703
UCSD-0845695	CC(O)CNC(=O)Nc1cc(C)nn1C	DDD01302957	7.46	10.7333
UCSD-0789428	CC1N(CC2CC2)C(=O)COC11CCN(CC1)C(=O)c1cscn1	DDD01029932	3.06	12.3953
UCSD-0823716	C(OC[C@H]1CC[C@@H]2[C@@H](CCN2Cc2cccnc2)O1)C1CC1	DDD01085098	6.53333	10.3151
UCSD-0802904	CS(=O)(=O)N1CC2(CCN(CC2)C2CCCCC2)Cc2ccccc12	DDD01061479	-1.4	26.0824
UCSD-0830329	CN(Cc1ccc2nsnc2c1)CC1(O)CNCCOC1	DDD01249531	1.83333	15.8245
UCSD-0790001	Cn1nccc1-c1ncc2CN(Cc3cccnc3)CCc2c1C(O)=O	DDD01030505	-2.94333	17.0487
UCSD-0796001	Cc1cnc(cn1)C(=O)N1CCc2ncnc(C)c2CC1	DDD01036834	-2.04333	16.6883
UCSD-0823945	O=C(NCC1CC1)C1=NOC2(CCN(C2)S(=O)(=O)c2cccs2)C1	DDD01085329	5.65	8.96957
UCSD-0786169	CC(C)(C)CN1CC(O)CN(CC1=O)C(=O)c1cccc(c1)C(F)(F)F	DDD01026356	-6.78	33.5241
UCSD-0785339	COC(=O)[C@@H]1CN(CCN1S(C)(=O)=O)S(=O)(=O)c1ccccc1	DDD01025490	-7.41333	30.9865
UCSD-0785961	O=C(N(CCC#N)CC1CCCO1)c1ccc(cc1)C#N	DDD01026148	1.77	12.0639
UCSD-0802529	C(N1CCCC(C1)c1nccnc1-n1ccnc1)c1ccccc1	DDD01061094	-1.676	18.7204
UCSD-0839539	CO[C@H]1CN(CC[C@@]11CCCO1)C(=O)Cc1ccccc1OC	DDD01270295	4.26667	16.6212
UCSD-0799921	Cc1c(CN2CCCC(O)C2)[nH]c2ccc(F)cc12	DDD01058485	7.98333	9.73221
UCSD-0791839	CN(C)C(=O)[C@@]12CCO[C@@H]1CCN(C2)c1ccc(C)nn1	DDD01032343	2.26667	21.9778
UCSD-0800217	NC1(CN2CCOCC2)CCCCC1	DDD01058781	-3.14333	23.35
UCSD-0823427	CN(C)C[C@H]1OC[C@@H]2CCN(C[C@H]12)S(=O)(=O)c1cccc(C)c1	DDD01084806	-6.14667	20.6543
UCSD-0831366	CCC[C@H]1CN(C[C@@H]1NC(=O)CCCn1ccnc1)S(C)(=O)=O	DDD01250572	-10.3667	22.6286
UCSD-0802696	CNC(=O)CCc1cc(C)nc(n1)C1CCCN1	DDD01061261	7.11333	7.35044
UCSD-0823826	O=C(N1CCCn2cnc(COCC3CC3)c2C1)c1ccoc1	DDD01085209	-5.04333	19.6256
UCSD-0801102	C(CNCc1cc(cn2nnnc12)-c1ccccc1)CC1CCOC1	DDD01059667	8.16467	7.35582
UCSD-0823585	C(N1CCc2ncnc(-c3ccsc3)c2CC1)c1ccccn1	DDD01084965	8.31	6.15551
UCSD-0837101	CC(C1CCN(Cc2cnn(C)c2C2CC2)CC1)N(C)C	DDD01256336	-2.58333	16.1634
UCSD-0798037	CC(C)NC(=O)c1cc(c(C)s1)S(=O)(=O)N(C)C	DDD01056600	-10.0833	33.1791
UCSD-0799071	Cc1cnc(CC2COCCN(C2)C(=O)c2cncs2)cn1	DDD01057634	-2.93333	28.3608
UCSD-0847360	Fc1ccc(SCCC(=O)NS(=O)(=O)c2ccc3OCCOc3c2)cc1	DDD01305099	3.958	9.95144
UCSD-0831038	Cc1cc(C)cc(c1)-n1ncc2C(N)CCCc12	DDD01250243	-0.306667	18.9552
UCSD-0839443	Cc1cnccc1CN1C[C@@H](O)[C@@H](C1)Oc1cccc(F)c1	DDD01270199	4.02	10.6532
UCSD-0824079	CC(C)[C@@H](CO)Nc1cc(ncn1)-c1cn[nH]c1	DDD01235798	1.422	12.9355
UCSD-0798518	Cc1cc(nc(n1)C1CCCN(C1)S(C)(=O)=O)-c1ccnn1C	DDD01057081	3.01667	15.574
UCSD-0786361	CC[S+](CC)[C-]1C(=O)NC(=O)N(Cc2ccc(F)cc2)C1=O	DDD01026581	2.17667	11.4353
UCSD-0789750	O=C(CC#N)NCc1nnc2CN(Cc3nccs3)CCn12	DDD01030254	4	18.0358
UCSD-0800418	C(N1CCN(CC1)c1ccccn1)c1cnc(nc1)C1CCCCO1	DDD01058982	-6.04333	28.8761
UCSD-0790744	CC(=O)N1CCc2ncn(C)c2C1C(=O)N1CCCC1	DDD01031248	-2.65667	17.2376
UCSD-0792511	CO[C@H]1CCN(C[C@@H]1Cc1cccc(C)c1)c1nnc(C)s1	DDD01033016	8.44667	8.69198
UCSD-0799690	Cc1ccc(CN2CCC(CC2)c2cnccn2)s1	DDD01058254	-1.82	19.5678
UCSD-0839185	CC(C)c1cc(CN2CCC(N)CC2)no1	DDD01259438	3.12667	11.2828
UCSD-0820716	Cn1ccnc1CN1CCC2(CC(N3CCCC3)c3ccccc23)CC1	DDD01082072	7.71667	12.4455
UCSD-0823536	Cn1cc(cn1)C1COC2(C1)CCN(CC2)C(=O)c1ccc(F)cc1	DDD01084915	6.21333	13.5402
UCSD-0799689	Cc1nn(C)cc1CN1CCN(CC1)c1cc(C)nc(c1)C1CCCN1	DDD01058253	1.13	15.4724
UCSD-0798650	CC(C)C(=O)N1CCC(CC1)c1nc2ccccn2c1NC(C)(C)C	DDD01057213	-9.02	31.6816
UCSD-0798691	Cn1ccnc1C(O)c1ccccc1N1CCN(Cc2ccsc2)CC1	DDD01057254	-2.82	23.6304
UCSD-0798728	CC(=O)N1CCOC(CCc2cc(ncn2)-c2c(C)noc2C)C1	DDD01057291	-5.82	19.6734
UCSD-0823895	O=C(Nc1ccccc1)N1CCn2nnc(COc3cccnc3)c2C1	DDD01085279	3.33333	10.1043
UCSD-0798116	CN(C)CC1(O)CCN(C1)C(=O)Cc1ccc2CCCCc2c1	DDD01056679	-8.01	25.8621
UCSD-0823583	CC(C)CN1Cc2c(ncn2-c2ccccc2S1(=O)=O)C(=O)N(C)C	DDD01084963	6.1	14.1361
UCSD-0798696	O=C(NCCc1cc2nc(ccn2n1)-c1ccncc1)C1CC1	DDD01057259	-7.53333	25.5551
UCSD-0799294	Cc1csc2c(nc(C)n12)C1CCCN(C1)C(=O)CCn1cncn1	DDD01057857	-3.04533	19.4421
UCSD-0823926	O=C1NC2(CC1c1ccncc1)CCN(Cc1cccnc1)CC2	DDD01085310	2.00667	13.4287
UCSD-0823653	O=C1[C@@H]2CCN(Cc3ccoc3)C[C@@H]2OCCN1c1ccccc1	DDD01085034	6.43333	10.5533
UCSD-0828718	CN(C)C[C@H]1CC[C@@H](Cc2ccc3n(C)ncc3c2)O1	DDD01247919	4.55667	9.29323
UCSD-0786122	CCOC(=O)[C@H]1[C@H]2CN(CCN2C[C@@H]1c1ccccc1)C(C)=O	DDD01026309	-11.3967	36.9953
UCSD-0793394	CN1CC(=O)N(CC11CCN(Cc2cccnc2)C1)c1cnn(C)c1	DDD01033899	9.71667	7.00292
UCSD-0824823	CCN(C)C[C@H]1CC[C@@H](Cc2ccc3n(C)ncc3c2)O1	DDD01244017	6.851	7.8892
UCSD-0784831	CCNC(=O)[C@@H]1CCCN1[C@@H](C(=O)NC)c1ccccc1	DDD01024982	5.00333	11.6234
UCSD-0826472	CNS(=O)(=O)c1ccc(CN2CCCN(Cc3ccncc3)CC2)cc1	DDD01245667	-16.8933	37.5055
UCSD-0830102	COc1cccc2CC(COc12)C(=O)N1CCSCC1	DDD01249304	10.2667	3.96159
UCSD-0787449	CS(=O)(=O)NCC(Cc1cccc(F)c1)N1CCNC1=O	DDD01027953	8.08667	10.1007
UCSD-0793253	CC1N(C)C(=O)COC11CCN(Cc2nccs2)CC1	DDD01033758	0.547333	13.5901
UCSD-0790408	O=C(Cc1ccccc1)N1CC[C@@H]2CNS(=O)(=O)[C@@H]2CC1	DDD01030912	9.32	5.07034
UCSD-0802358	CNc1cncc(n1)C1CCCN1C(=O)c1ccc2nc(C)[nH]c2c1	DDD01060923	0	23.4974
UCSD-0789429	CC1N(CC2CC2)C(=O)COC11CCN(CC1)C(=O)c1ccncc1	DDD01029933	12.8333	1.5695
UCSD-0844484	COc1ccccc1CC1CCCN(CCC(N)=O)C1	DDD01301402	7.94	8.31546
UCSD-0789197	CC1NC(=O)COC11CCN(CC1)C(=O)Cc1ccsc1	DDD01029701	5.82333	9.63118
UCSD-0798896	CN(CC1(C)COC1)C(=O)c1cc(nc2ccccc12)-c1cnn(C)c1	DDD01057459	4.86667	15.3262
UCSD-0847223	CC(C)c1nccn1C1CCCN(C1)C(=O)c1ccc2[nH]nnc2c1	DDD01304927	-0.786667	13.3915
UCSD-0837719	CC(C)c1cc(NCC(N(C)C)c2ccccn2)n2nc(C)cc2n1	DDD01256956	4.95333	10.0298
UCSD-0784917	COCCO[C@H]1COCCN(Cc2ccc(OC)cc2)C1	DDD01025068	2.19	10.8468
UCSD-0839528	CC(=O)N1C[C@H]([C@@H]2CN(Cc3ccccc3)CC[C@H]12)c1ccsc1	DDD01270284	9.97	6.43037
UCSD-0799618	Cc1ncc(CN2CCC(O)(CC2)c2ccccc2F)cn1	DDD01058182	-5.86667	18.0749
UCSD-0799398	Cc1nc(co1)C(=O)N1CCC(C1)c1cc(CCO)n(C)n1	DDD01057961	-3.63667	18.8904
UCSD-0799532	CS(=O)(=O)c1cncnc1C1CCCN(C1)C(=O)Nc1ccc(F)cc1	DDD01058095	-2.53333	26.6958
UCSD-0837037	CSc1nccc(n1)N1C[C@H](CO)[C@H](CN2CCCCC2)C1	DDD01256272	-8.70667	23.4024
UCSD-0795421	O=C(C1CCCC1)N1CCC2(CC1)COCCN2CC1CC1	DDD01036254	8.529	7.16286
UCSD-0789507	CS(=O)(=O)N1Cc2nc(oc2C1)C(=O)NCc1ccccc1	DDD01030011	7.30667	7.94595
UCSD-0823981	C(C1CCOC1)N1CCC2(C1)CCN(CC2)c1ncccn1	DDD01085365	3.26667	13.0539
UCSD-0702851	OCCN1CCN(CC2=COC(=N2)C2=CC=C(Cl)C=C2)CC1	DDD01301883	6.97067	6.98687
UCSD-0823589	Cc1noc(n1)[C@H]1C[C@H]2OCC[C@H]2N(Cc2ccc3OCOc3c2)C1	DDD01084969	-5.76	30.9537
UCSD-0788873	Clc1cccc(CN2C(=O)CC3(CCCNC3)C2=O)c1	DDD01029377	11.8667	2.83784
UCSD-0823872	O=C(N1CCn2nnc(COc3cccnc3)c2C1)c1cccnc1	DDD01085256	13.2667	1.30512
UCSD-0793695	CC(C)NC(=O)N1CCN(CC2(CN(C)C(=O)C2)C1)C(=O)C(C)C	DDD01034200	-6.18	19.6592
UCSD-0798204	CNC(=O)CCc1cc(nc(C)n1)C1CCCN1S(C)(=O)=O	DDD01056767	-5.97333	26.5862
UCSD-0833082	O=C(N1CCCC1)N1CCCC(C1)c1nccn1Cc1ccncc1	DDD01252292	-5.67	27.1299
UCSD-0800713	OC(=O)c1ccc(CN2CCC(CC2)c2ccnc3ccnn23)cc1	DDD01059278	-1.033	16.0703
UCSD-0824274	CN1CCCN(CC1)c1nccc(n1)-c1c[nH]nc1C1CCCCC1	DDD01235993	7.89847	7.21795
UCSD-0798784	Cc1noc(C)c1S(=O)(=O)N1CCCC1(C)c1nccc(C)n1	DDD01057347	-5.87333	30.1053
UCSD-0802608	COc1ccc(CN2CCc3nc(ncc3C2)C2CCCCN2C)cc1	DDD01061173	5.06	8.54729
UCSD-0801815	Oc1cc(nc(n1)C1CCCN1C(=O)CN1CCCC1)-c1ccccn1	DDD01060380	1.01	16.0268
UCSD-0799706	CC(C)N1CCC(C1)c1n[nH]cc1-c1ccnc(N)c1	DDD01058270	5.14	9.15831
UCSD-0798737	CC(C(=O)NCc1ncc[nH]1)n1nc(cc1C)C(F)F	DDD01057300	-7.33667	27.9684
UCSD-0784539	CN1CCN(CC1)C1CCN(CC1)C(=O)CCC1CCCC1	DDD00002365	1.49667	12.3529
UCSD-0828675	CCN(CC)Cc1cc(C(=O)N2CC(C)(C)[C@@](C)(O)C2)c(C)o1	DDD01247876	-1.06667	13.3665
UCSD-0823818	CN(C)c1ncnc2CCN(CC3CCOC3)CCc12	DDD01085201	-7.10933	25.9379
UCSD-0789276	CCN1CCC2(CC(NC(=O)c3ccnnc3)c3ccccc23)CC1	DDD01029780	11.2	2.3516
UCSD-0839480	Cc1cc(on1)-c1cnn(CCNC(=O)C2CC2)c1C1CC1	DDD01270236	3.03	14.4564
UCSD-0823772	CS(=O)(=O)NCc1cn2CCN(Cc2n1)C(=O)c1ccc[nH]1	DDD01085154	-1.37333	13.4876
UCSD-0821530	CCCN1CCC2(CN(C(=O)c3cccnc3)c3ccc(F)cc23)CC1	DDD01082900	-10.11	27.9915
UCSD-0823771	O=C(N1CCC[C@]2(C[C@@H](CO2)OCC2CC2)C1)c1ccc2OCOc2c1	DDD01085153	7.84667	8.63751
UCSD-0790412	O=C(CO[C@@H]1CC[C@H]2[C@H]1OCCN2c1ncccn1)N1CCCC1	DDD01030916	-6.68	21.3473
UCSD-0800594	C1CC(CCN1)c1cnc(cn1)-c1cc[nH]n1	DDD01059159	-7.936	27.1004
UCSD-0799696	CN(C)c1cc(ccn1)C1CCCN(Cc2cnn(C)c2)C1	DDD01058260	0.87	18.3113
UCSD-0829961	CCc1nccn1CCC(=O)N1CCN(CC1C)c1ccccc1C	DDD01249163	-0.383333	12.3718
UCSD-0795918	CN(C[C@H]1OC[C@@H]2CCN(Cc3cccs3)C[C@H]12)Cc1ccco1	DDD01036751	3.84	10.1032
UCSD-0799611	Nc1ncc(CN2CCC(O)(CC2)c2ccccc2F)cn1	DDD01058175	-0.883333	15.8791
UCSD-0792715	Cn1cc(CN2CCc3c(CNC(=O)C4CC4)cncc3C2)cn1	DDD01033220	7.74333	5.07409
UCSD-0785459	CCN(CC)CC[C@H]1CN(CC[C@H]1CC(O)=O)C(=O)C(C)(C)C	DDD01025610	-6.39333	25.2731
UCSD-0785907	CC(=O)N1N=C(OC1C(=O)NCC(=O)OC(C)(C)C)c1ccccc1	DDD01026094	5.42333	13.1369
UCSD-0790326	CN1CCN(Cc2ccco2)Cc2ccc(C)nc12	DDD01030830	9.88667	6.08856
UCSD-0824134	Cc1ncc(-c2ccnc(SCCN)n2)c(n1)-c1ccco1	DDD01235853	-0.393333	15.5915
UCSD-0790080	CN1CCn2c(C)cnc2C11CCN(CC2CC2)CC1	DDD01030584	-4.3	15.6368
UCSD-0803012	FC(F)(F)c1cc(nc(c1)C(F)(F)F)C(=O)NC1CC1	DDD01061594	4.97333	10.4944
UCSD-0839140	Cn1nccc1CNC(=O)CCn1nc(cc1C1CC1)C(F)(F)F	DDD01259393	-3.84333	17.0173
UCSD-0787543	COc1ccc(Cl)cc1NC(=O)CN1CCc2nc(NC(C)=O)sc2C1	DDD01028047	-7.1	18.2945
UCSD-0799609	Cc1ncc(-c2ccncc2)c(n1)C1CCN(CC1)C(=O)c1ccco1	DDD01058173	-12.4867	29.7911
UCSD-0786215	COc1ccc2OCC(C)(C)C=C3CN(Cc1c23)C(=O)N(C)C	DDD01026402	-13.1133	37.2629
UCSD-0790414	Cc1ccc(cc1)N1CCO[C@H]2[C@@H](CC[C@H]12)OCC(=O)N1CCCC1	DDD01030918	3.82333	13.6581
UCSD-0798517	COc1cccc(F)c1CN1CCC(C1)c1nccc(C)n1	DDD01057080	-2.67333	20.0454
UCSD-0799993	Cc1cc2nccc(C3CCN(CC3)C(=O)c3ccccc3F)n2n1	DDD01058557	-1.65667	14.8543
UCSD-0785958	CCN(CC)CCNC(=O)CCc1c(C)nn(c1C)-c1ccccc1Cl	DDD01026145	-11.5067	26.7021
UCSD-0817794	CN(C)C1CCN(CC1)C(=O)CCc1cc(Br)cs1	DDD01078781	7.462	6.35304
UCSD-0821373	Cc1nc(CO[C@H]2CN([C@@H]3COC[C@H]23)C(=O)c2cccn2C)cs1	DDD01082741	-17.4	32.883
UCSD-0790370	Cn1cc(CN2CCc3ncnc(C4CCOC4)c3CC2)cn1	DDD01030874	-4.00333	15.6305
UCSD-0834608	N[C@H]1CN(C[C@@H]1C1CC1)C(=O)c1ccccc1Oc1ccccc1	DDD01253825	-3.12667	20.9358
UCSD-0803022	COc1ccc(Cn2cc(nn2)C(C)O)cc1	DDD01061604	1.14	10.6672
UCSD-0799922	Cc1cnc2[nH]c(c(CN3CCCC(CO)C3)c2c1)C(F)(F)F	DDD01058486	-1.33667	20.6841
UCSD-0785003	CN1CCC(CC1)N[C@@H]1CO[C@H](CNC(=O)c2cccs2)[C@H]1O	DDD01025154	-4.05	18.4316
UCSD-0798778	C1CN(CCC1c1ccncc1)c1ccccc1	DDD01057341	-7.40667	23.4046
UCSD-0789504	CCOCC1CN(Cc2nnn(CC3CC3)c12)C(=O)N(C)C	DDD01030008	5.59	11.4107
UCSD-0791229	CC(C)n1nc(Cn2cccn2)c2CN(Cc12)C1CCOC1	DDD01031733	-6.96667	17.8023
UCSD-0802548	CNc1nc(C)c(s1)C(=O)N1CCCCC1CN1CCCCCC1	DDD01061113	11.3033	1.895
UCSD-0823900	CN(C)S(=O)(=O)N1CC[C@]2(C[C@@H](CO2)Oc2ncccc2F)C1	DDD01085284	4.34667	7.80308
UCSD-0809499	O=C(N(Cc1ccncc1)C1CC1)c1cccnc1	DDD01069114	0.644	11.9821
UCSD-0786133	CO[C@@H]1CN(c2ccccc2)S(=O)(=O)[C@@]11CCN(C1)C(C)=O	DDD01026320	-12.4103	33.9927
UCSD-0802545	CC(=O)N1CCC(C1)c1ccnc(Nc2cncnc2)n1	DDD01061110	-1.31333	20.6736
UCSD-0795869	Cc1occc1C(=O)N1CCC2(CCN(Cc3nccs3)C2)CC1	DDD01036702	4.09	8.08445
UCSD-0785795	Cc1ccc(Oc2ncccc2C(O)=O)c(C)c1	DDD01025982	-7.38667	20.1584
UCSD-0791850	CC(C)N(C)Cc1cnc2CN(Cc3ccco3)CCn12	DDD01032354	-6.17333	24.3717
UCSD-0789417	O=C1CC[C@H]2[C@H](CCN2c2ccccn2)N1CC1CCOCC1	DDD01029921	2.738	9.15951
UCSD-0815556	CC(C)Cn1ccnc1CNC1CCCOc2cc(C)ccc12	DDD01076227	-9.83333	20.9934
UCSD-0823476	COc1ccc(CN2CCn3cc(CN4CCN(C)CC4)nc3C2)cc1	DDD01084855	-2.92667	20.3849
UCSD-0823769	O=C(N1CC[C@]2(C[C@H](CO2)OCCN2CCCC2)C1)c1cscn1	DDD01085151	-0.166667	17.4809
UCSD-0799079	Cc1ccc(s1)-c1nnc(o1)C1CCCN1S(=O)(=O)c1cnn(C)c1C	DDD01057642	-2.08667	14.5356
UCSD-0791650	Cc1nccc(n1)[C@@H]1C[C@@H]2CCN(C[C@H]2O1)S(=O)(=O)C1CC1	DDD01032154	-1.50667	14.0636
UCSD-0603306	N#CC1=C2C=CC=CN2C=C1CN1CCCC1CN1C=NC=N1	DDD01062711	-3.36667	14.1047
UCSD-0844756	CN(C1CCN(CC1)C(=O)c1ccc2COCc2c1)c1cccnn1	DDD01301756	-2.28667	18.3665
UCSD-0800592	COc1ccccc1C1Cn2ccnc2CN1Cc1c[nH]nc1C	DDD01059157	-7.45667	27.3156
UCSD-0797933	CN(C)Cc1cc(nn1C)C1CCN(CC1)C(=O)C1CCCNC1	DDD01056496	1.56333	12.7545
UCSD-0820574	COc1cc(ncn1)N1CCC2(CN(c3ccccc23)S(C)(=O)=O)CC1	DDD01081930	-14.2	32.8688
UCSD-0798036	O=C(Cn1c(cc2cccnc12)-c1ccco1)N1CCCC1	DDD01056599	-10.9	20.6952
UCSD-0785837	NC(=O)CN1CCC2(CC1)CC(=O)c1ccc3ccccc3c1O2	DDD01026024	-13.1997	34.0936
UCSD-0791109	CN1CCN(C[C@H]2OC[C@@H]3CCN(C[C@H]23)C(=O)c2cnccn2)CC1	DDD01031613	-0.51	12.7749
UCSD-0820864	CN(C)CCN1C(=O)C2(CCN(CC3CC3)CC2)c2ccccc12	DDD01082223	-9.5	21.4893
UCSD-0793521	Cc1nc(CN2[C@@H]3CCN(C4CCOC4)[C@H]3CC2=O)cs1	DDD01034026	-3.13333	13.9292
UCSD-0800106	CC(=O)N1CCC(C)(CC1)c1nc(C)no1	DDD01058670	-10.3367	25.3531
UCSD-0820865	CC(C)N1CCC2(CC1)C(=O)N(CCN(C)C)c1ccccc21	DDD01082224	-6.248	23.0434
UCSD-0785024	CS(=O)(=O)N1CCN2[C@@H](CN(C3CCOCC3)C2=O)C1	DDD01025175	-1.92733	15.3443
UCSD-0820786	Cc1noc(C)c1CN1CCn2cc(CN3CCCCC3)nc2C1	DDD01082144	-10.6833	25.639
UCSD-0800705	CC(=O)N1CCN(CCCOc2ccccc2F)CC(C1)C(N)=O	DDD01059270	-11.8667	24.5504
UCSD-0826898	OC(=O)C1CC2(CN1)CCN(CC2)c1nccc2ccccc12	DDD01246093	-8.76667	19.2074
UCSD-0800119	Oc1ccc(CN2CCOCC(O)(CNC(=O)c3cnccn3)C2)cc1	DDD01058683	-1.86667	20.1644
UCSD-0795017	CCS(=O)(=O)N1CCc2ccc(NC(=O)Nc3ccc(F)cc3F)cc12	DDD01035782	0.96	13.0198
UCSD-0839355	CN1CCCC(C1)c1n[nH]c2ncccc12	DDD01270111	-5.2	16.2059
UCSD-0785432	FC(F)(F)c1ccc2nc([nH]c2c1)[C@H]1CCN(C1)C1CCOCC1	DDD01025583	-2.87333	14.0401
UCSD-0823717	Cn1cc(CN2C[C@@H]3COC[C@H]([C@@H]3C2)C(=O)N2CCCCO2)cn1	DDD01085099	11.1133	1.7806
UCSD-0803008	OC(=O)Cc1cn2cc(ccc2n1)C(F)(F)F	DDD01061590	-8.04	20.8532
UCSD-0839145	Cc1c(NC(=O)c2noc3CCCCc23)cnn1C	DDD01259398	-8.43333	19.5684
UCSD-0791071	Cc1cc(no1)C(=O)N1CC[C@@H]2CO[C@@H](CN3CCCC3)[C@@H]2C1	DDD01031575	4.03	11.3938
UCSD-0810922	COc1cccc(c1)C1(CNC(C)c2nnc(C)o2)CCCC1	DDD01070832	6.92333	5.62571
UCSD-0837855	OC1(CNCc2ccccn2)CCCN(Cc2ccc(F)c(F)c2)C1=O	DDD01257092	-8.9	20.6027
UCSD-0796251	Cn1cc(cn1)N1CC2(CCN(CC3CCOCC3)CC2)OCC1=O	DDD01037084	2.06	10.2224
UCSD-0823770	Cc1ncsc1CN1CC[C@@H]2[C@H](C1)OCCN(c1ccccc1)C2=O	DDD01085152	-4.39	21.2637
UCSD-0800488	Cc1csc(n1)C(Cc1ccsc1)NC(=O)c1cc(=O)n(C)c(=O)n1C	DDD01059053	-6.49	20.6277
UCSD-0803955	CCOCCOC(C)C(=O)Nc1ccc2ccn(CC(=O)NC)c2c1	DDD01062717	-2.06333	12.527
UCSD-0799911	Cc1cc(C)n(CC(=O)N2CCCC2c2cc3cccnc3[nH]2)n1	DDD01058475	-7.50667	28.7758
UCSD-0798689	O=C(NCCc1cc2nc(ccn2n1)-c1ccncc1)C1CCOCC1	DDD01057252	6.60667	9.69
UCSD-0801816	CC(=O)Nc1nc(cs1)C1CCN(CC1)C(=O)C1CCC1	DDD01060381	0.806667	10.0498
UCSD-0834001	Cc1ccc(C#N)c(n1)N1CC(C)(C)[C@@](C)(O)C1	DDD01253216	-5.24667	16.6987
UCSD-0846330	O=C(Cc1ccc(cc1)-n1cccn1)N1CCN2CCCCC2C1	DDD01303792	-2.92	15.5605
UCSD-0831677	COc1cccc(CNC(=O)C(C)n2ccnc2C(C)C)c1OC	DDD01250884	-4.99333	18.0416
UCSD-0799704	CC(C)N1CCOC(C1)c1cc(CCO)[nH]n1	DDD01058268	-1.46667	22.984
UCSD-0798212	CCN(CC)S(=O)(=O)N1CCCC1c1nnc2CCN(C)CCn12	DDD01056775	-8.37	31.3156
UCSD-0839016	OC(=O)c1nsc2C(CC(=O)Nc12)c1cccs1	DDD01258254	5.76333	5.8162
UCSD-0823941	CC(C)NC(=O)N1C[C@@H]2C[C@@H]([C@H](C1)O2)C(=O)NCc1ccccc1	DDD01085325	3.96667	13.6588
UCSD-0786360	C[S+](C)[C-]1C(=O)NC(=O)N(CCc2ccc(F)cc2)C1=O	DDD01026580	-1.07	12.0716
UCSD-0723577	CC(C)C(CNC(=O)CCN1C=NC=N1)N1CCC2=C(C1)C=CC=C2	DDD01064747	2.52333	12.0689
UCSD-0799087	CCS(=O)(=O)N1C[C@@H](O)[C@@H](C1)N(C)Cc1ccc(F)cc1	DDD01057650	0.593333	17.0646
UCSD-0831235	CCN(CCSc1ccccc1)C(=O)c1cn(nn1)C1CCC(N)CC1	DDD01250440	-5.73333	16.129
UCSD-0800711	CC1(CNCCO1)C(=O)N1CCN(CC1)C1CCCC1	DDD01059276	0.833333	14.5548
UCSD-0839103	Cc1cccnc1CNCC1(O)CCCN(Cc2ccc(F)cc2)C1=O	DDD01258343	5.03667	6.7088
UCSD-0790413	Cc1cccc(CN2Cc3[nH]nc(COCc4nccs4)c3C2)n1	DDD01030917	-2.50667	12.6884
UCSD-0791938	O=C(N1C[C@@H](OCc2cccnc2)[C@H]2OCCC[C@@H]12)c1ccnnc1	DDD01032442	2.51333	10.8595
UCSD-0800403	CN(C)Cc1cc(nn1C)C1CCCCN1S(=O)(=O)Cc1ccccc1	DDD01058967	1.1	17.685
UCSD-0795351	CNC(=O)[C@@H]1C[C@H]2CN(Cc3ccco3)C[C@H]2N1C	DDD01036184	-6.34667	17.5352
UCSD-0828031	CCC[C@H]1CN(C[C@@H]1NS(C)(=O)=O)C(=O)CCn1ccccc1=O	DDD01247231	-4.28333	23.1758
UCSD-0796250	COCCN1CC[C@H](O)[C@@H]1Cc1ccccc1	DDD01037083	4.83667	9.0834
UCSD-0839252	Cc1sc(nc1-c1cc(C)cc(Br)c1O)N1CCOCC1	DDD01259506	3.101	7.76166
UCSD-0836512	Cc1noc(C)c1CCNc1nccc(CCC(F)(F)F)n1	DDD01255738	1.86133	9.54056
UCSD-0791234	Cc1ccc(nn1)N1CC[C@@H]2[C@@H]1CCN2C(=O)c1cscn1	DDD01031738	-0.0266667	15.412
UCSD-0846378	CN(C)CC1CN(Cc2coc(n2)-c2ccccc2Cl)CCO1	DDD01303855	7.56333	3.90111
UCSD-0800801	COc1ncc(CN(CCCN2CCOCC2)Cc2ccc(C)o2)cn1	DDD01059366	-2.68	21.0522
UCSD-0839485	COCCN1CCCC1c1nccnc1Nc1nc(C)cs1	DDD01270241	2.00833	8.90955
UCSD-0802553	CC(=O)N1CCOC(C1)c1cc(nc(C)n1)N1CC(O)C1	DDD01061118	2.81333	11.4324
UCSD-0839478	CC(C)N1CCC(CC1)c1cncc(n1)-c1ccccc1C	DDD01270234	1.89667	15.4519
UCSD-0800587	O=C(C1CCC1)N1C[C@H]([C@@H]2CN(CC[C@H]12)C1CCCCC1)c1ccsc1	DDD01059152	3.3	14.8091
UCSD-0786177	COc1ccc(cc1)C(=O)N1CC(O)CN(CC2CC2)C(=O)C1	DDD01026364	-15.8823	38.3991
UCSD-0823587	Cn1ncc2CN(Cc3ccc(F)cc3)CC(COCC3CC3)c12	DDD01084967	-3.31	17.9829
UCSD-0793307	COc1cc(ncn1)N1C[C@H]2OCC[C@H]2[C@H](C1)C(=O)NC1CC1	DDD01033812	8.29667	5.72504
UCSD-0796225	CN1C[C@H]2CCN(CC[C@H]2S1(=O)=O)C(=O)NC1CCCC1	DDD01037058	3.53	9.99029
UCSD-0824253	CC[C@H](C)[C@H](N)C(=O)N1Cc2nc(Nc3ccc(F)cc3)sc2C(=O)C1	DDD01235972	2.70667	8.45594
UCSD-0798826	Cc1n[nH]c(C)c1CC(=O)N1CC[C@@](C)(O)[C@@H](C1)Oc1ccccc1	DDD01057389	-6.94333	26.5303
UCSD-0836613	COC(=O)NCC(=O)N(C)CC1Cc2ccccc2CN1C	DDD01255841	-16.1333	27.5544
UCSD-0790826	CNC(=O)CN1CCO[C@H]2CN(C[C@@H]12)C(=O)C1CC1	DDD01031330	-1.60667	13.3502
UCSD-0802577	Cc1nonc1C(=O)N1CCCC(C1)c1ncncc1-c1ccncc1	DDD01061142	6.48667	4.5658
UCSD-0786080	CC(C)CN1CC(O)CN(CC1=O)S(=O)(=O)c1ccc(F)cc1	DDD01026267	-20.7077	46.5107
UCSD-0794025	Cc1occc1C(=O)N1CCn2cnc(COCC3CC3)c2C1	DDD01034530	-4.26667	13.9141
UCSD-0800216	CC(C)N1CCC(CC1)c1nc(C)c(Br)s1	DDD01058780	-3.93667	23.3686
UCSD-0800207	COc1ccc(cc1)N1CCN(C(C1)C(O)=O)C(=O)OC(C)(C)C	DDD01058771	-7.23667	25.305
UCSD-0795450	COCCCN1CC2(CC1=O)CCCCN2C(=O)c1ccsc1	DDD01036283	0.166667	9.90255
UCSD-0796355	CC(C)N1CCOCC2(CN(Cc3nccs3)CCO2)C1	DDD01037188	-0.0233333	16.5724
UCSD-0823470	Cc1ccc(o1)C(=O)N1CCC2(CCN(C2)C(=O)c2cccnc2)CC1	DDD01084849	9.15667	4.14568
UCSD-0601706	CC1=C2C=CC=CC2=NC(CN2CCCC(CN3C=NC=N3)C2)=N1	DDD01296528	-0.48	11.5019
UCSD-0784576	CNC(=O)c1cc2ccccc2n1C	DDD00908410	-13.44	26.9728
UCSD-0802893	CC(C)C(=O)N1Cc2ccccc2CC2(CCCCN2C)C1	DDD01061468	-2.515	15.9042
UCSD-0785899	CC(=O)N1N=C(Cc2ccccc2)OC1C(=O)NCC(=O)OC(C)(C)C	DDD01026086	-3.96667	25.9278
UCSD-0823894	O=c1cccnn1CC1CN(Cc2ccsc2)Cc2nccn2C1	DDD01085278	9.21	3.70962
UCSD-0790328	CC(C)NC(=O)N1CCC2(CC1)NC(=O)CC2c1ccncc1	DDD01030832	7.62667	5.15931
UCSD-0817027	CN(Cc1nnc(o1)-c1ccco1)C(C(N)=O)c1cccc(F)c1	DDD01077911	5.95633	5.62729
UCSD-0741984	CC(C)N1C(=O)N(CC(=O)NC2=CC=CC(Cl)=C2)C2=C(SC=C2)C1=O	DDD01035449	-6.10333	25.3031
UCSD-0798824	CC(=O)N1CCOCC(Cc2ccc3n(C)ccc3c2)C1	DDD01057387	-15.6467	36.1461
UCSD-0798904	CC1(CCN(CC1)S(=O)(=O)c1ccccc1)c1[nH]ncc1C(N)=O	DDD01057467	-3.36667	17.5027
UCSD-0823539	Fc1ccc(cc1)C(=O)N1CCN2C[C@@H](C[C@H]2C1)OCc1ccccn1	DDD01084918	2.66667	14.61
UCSD-0839192	Cc1cn(Cc2ccc(C)cc2)nc1N	DDD01259445	2.1	9.06035
UCSD-0811236	Cc1cnn(CCNCC(O)c2cccc(Br)c2)c1	DDD01071224	-6.18567	21.1817
UCSD-0790000	Cc1ncc2CN(CCc2c1C(O)=O)c1ncc(F)cn1	DDD01030504	-5.15333	16.3059
UCSD-0821688	O=C(CC1CC1)N1CCC2(C1)COCc1cnc(nc21)-c1cccnc1	DDD01083058	-7.62667	27.6148
UCSD-0823823	C(N1CCC2(CC1)CCN(CC2)c1ncccn1)c1ccncc1	DDD01085206	7.83667	5.08773
UCSD-0800882	NC(=O)c1cc2CN(CCc2nc1N)C(=O)C1CCCCC1	DDD01059447	-3.4	12.8187
UCSD-0795384	Cc1cccc(CN2C[C@@H]3CN(C[C@@H]3C2=O)C(=O)[C@H]2CCCO2)c1	DDD01036217	-5.4	14.5492
UCSD-0823994	CCc1ccc(CN2CCC3(CC2)NC(=O)CC3c2ccncc2)o1	DDD01085378	6.35	8.06396
UCSD-0823998	COCC(=O)N1CCC2(CC(CC(=O)NC3CC3)c3ccccc23)CC1	DDD01085382	-9.4	18.3894
UCSD-0839194	CCN(CC)C(=O)c1c(Br)cnn1CC	DDD01259447	-5.89667	16.0207
UCSD-0823929	O=C(NCc1ccccc1)[C@H]1C[C@H]2CN(C[C@@H]1O2)S(=O)(=O)C1CC1	DDD01085313	5.93333	8.69617
UCSD-0816673	COc1ccc(C)cc1CN(C)CCCNS(C)(=O)=O	DDD01077518	9.16667	2.00156
UCSD-0824054	CCO[C@H]1CO[C@]2(C1)CCCN(C2)S(=O)(=O)c1ccccc1	DDD01085438	4.83333	9.04286
UCSD-0831172	Cc1nc2CCNCCc2c(n1)N1CCCC(C1)OCc1ccccn1	DDD01250377	-2.12333	18.9497
UCSD-0817246	CN(Cc1cccc(NC(=O)N(C)Cc2nccs2)c1)C(C)=O	DDD01078166	-7.96667	17.0086
UCSD-0799912	OCCN(Cc1ccncc1)CC1(CC1)c1ccc(Cl)cc1	DDD01058476	-6.651	21.8637
UCSD-0802131	O[C@@H]1CN(Cc2ccncc2)C[C@H]1Oc1ccccc1	DDD01060696	-1.84	11.3304
UCSD-0785803	CN(C)C(=O)c1cccnc1SCc1ccccc1C#N	DDD01025990	-8.80333	23.7829
UCSD-0802136	Cc1c(CN2C[C@@H]3CCCN3C[C@H]2Cc2ccccc2)cnn1C=C	DDD01060701	-7.66667	16.4272
UCSD-0801188	Nc1nccnc1C1CN(CCO1)C(=O)c1cnc(nc1)C1CC1	DDD01059753	-3.62567	17.4799
UCSD-0789198	CN1C[C@H](COCC2CC2)[C@H]2CCN(Cc3ccco3)CC[C@H]2C1=O	DDD01029702	-0.334	11.45
UCSD-0795858	Fc1cnc(nc1)N1CC[C@H]2O[C@H](CC[C@@H]12)C(=O)NC1CC1	DDD01036691	-6.05667	15.6977
UCSD-0801423	O=C(CCC1CCCC1)N1CCCC(C1)c1ncc2CNCCc2n1	DDD01059988	1.02	11.3668
UCSD-0835298	C(CN1CCN(CC1)c1ncnc2[nH]ccc12)Oc1ccccc1	DDD01254518	-2.181	14.9678
UCSD-0798029	Cc1nn(C)cc1CN1CCc2nc3sccc3c(=O)n2CC1	DDD01056592	-5.65667	22.7072
UCSD-0808745	Fc1ccc(cc1)-n1ccc(CCNC(=O)C2CCCOC2)n1	DDD01068226	-12.5433	28.4381
UCSD-0798776	COCC(=O)N1C[C@@H](O)[C@@H](C1)N1CCN(CC1)c1ccccc1	DDD01057339	-3.94667	22.9737
UCSD-0842417	CCN1CCOC(CNCc2cccc(OCc3ccccn3)c2)C1	DDD01298794	6.75	5.05501
UCSD-0794088	O=C(N1C[C@H]2OCC(=O)N(Cc3cccnc3)[C@@H]2C1)c1ccoc1	DDD01034593	7.47	3.49069
UCSD-0799698	CCOc1ccc(CN2CCC(C2)c2nc(C)cc(C)n2)cc1CO	DDD01058262	1.2	16.6289
UCSD-0801335	Cc1cc(CCC(N)=O)cc(n1)C1CCCN1Cc1cnc(C)nc1	DDD01059900	5.89	8.00039
UCSD-0821226	COc1cc(ncn1)N1CCCC2(CCN(C2=O)c2cncnc2)C1	DDD01082590	-1.90667	19.2236
UCSD-0801421	O=S1(=O)NC(Nc2ccccc12)C1CCN(Cc2ccccn2)CC1	DDD01059986	-1.79	18.4864
UCSD-0823891	CS(=O)(=O)N1CCC[C@]2(C[C@H](CO2)Oc2ncccc2F)C1	DDD01085275	0.723333	10.3491
UCSD-0826053	O=C1NC2(CC1c1ccccc1)CCN(Cc1ccccc1C#N)CC2	DDD01245248	4.08667	9.82032
UCSD-0786358	CC[S+](CC)[C-]1C(=O)NC(=O)N(CCc2ccc(F)cc2)C1=O	DDD01026578	-1.43	14.0329
UCSD-0801100	CC(C)S(=O)(=O)N1C[C@H]2CC[C@@](O)([C@H]2C1)c1ccc(C)cc1	DDD01059665	-13.4	22.9876
UCSD-0823938	O=C(N1CCC2(C1)CN(C(=O)C2)c1cccc(c1)C#N)c1cccnc1	DDD01085322	1.4	15.9377
UCSD-0821380	CN(C)C1COC2(C1)CCN(CC2)S(=O)(=O)c1ccc(F)cc1	DDD01082748	8.49667	3.7327
UCSD-0791733	CNC(=O)CN1CC[C@H]2CN(C[C@H]2C1)C(=O)c1cccn1C	DDD01032237	-4.85667	15.6003
UCSD-0828321	COc1ccccc1Oc1ncccc1CNC(=O)[C@H](N)CC(C)(C)C	DDD01247521	1.23667	10.0796
UCSD-0785829	Brc1cc(Br)c2OC3(CCN(CC3)C(=O)c3ccccn3)CC(=O)c2c1	DDD01026016	-16.9583	38.8054
UCSD-0785076	CNC(=O)[C@H](N1CCC[C@H]1C(=O)NC1CCCC1)c1ccccc1F	DDD01025227	2.84667	10.6173
UCSD-0800578	Cc1c[nH]nc1C1CCN(C1)C(=O)C1CCCC1	DDD01059143	-8.89667	26.1761
UCSD-0839442	CO[C@H]1CN(CC[C@@]11CCCO1)C(=O)c1ccc2oc(C)cc2c1	DDD01270198	-2.09667	11.1943
UCSD-0803963	CC1CS(=O)(=O)CCN1CCCc1ccc(Cl)cc1	DDD01062725	-6.60333	20.6356
UCSD-0816556	COCCN1CCC(CC1)Nc1c(F)cc(cc1F)C#N	DDD01077393	1.89333	12.0197
UCSD-0821531	Cn1cc(CNC2CCc3c(C2)ccc(=O)n3C)cn1	DDD01082901	-10.16	25.8645
UCSD-0798131	CCC1CNCc2cc3c(C)ccc(C)c3nc2O1	DDD01056694	-6.05667	18.0092
UCSD-0824361	N[C@H]1CN(C[C@@H]1C1CC1)C(=O)c1ccc(Cl)cc1F	DDD01243554	-1.99333	16.616
UCSD-0822516	CN(C)CCN1C2(CCN(Cc3nccs3)C2)c2ccccc2S1(=O)=O	DDD01083892	-11.7	21.1795
UCSD-0823980	COC[C@@H]1CC[C@H]2[C@H](CCN2S(=O)(=O)c2ccc(F)cc2)O1	DDD01085364	3.52333	7.03046
UCSD-0846170	CC(C)(C)c1cnc(CN2CCCC2Cn2cccn2)o1	DDD01303591	0.546667	12.1816
UCSD-0799088	CN(C)S(=O)(=O)N1C[C@@H](O)[C@@H](C1)N(C)Cc1ccc(F)cc1	DDD01057651	-9.13333	17.7782
UCSD-0802600	CC(=O)N1CCCC1c1nccnc1Nc1cccc(C)n1	DDD01061165	8.28667	3.41856
UCSD-0798043	Cc1ccc(cn1)-c1nc(no1)C1CCN(CC1)C(=O)c1ccn(C)n1	DDD01056606	-8.81867	25.4832
UCSD-0798509	CC1(CCCCO1)c1ncc(CN2CCN(CC2)c2ncccn2)cn1	DDD01057072	-11.9467	28.3458
UCSD-0832642	COc1ccc(OC)c(c1)C1CCN(CC(C)(C)N2CCOCC2)C1	DDD01251851	5.19367	5.49866
UCSD-0823927	O=C(N1C[C@H]2CCCN(CC3CCOCC3)[C@H]2C1)c1ccco1	DDD01085311	7.10333	4.88897
UCSD-0827922	CSc1ccccc1CN1C[C@@H]2CC[C@H]1CN(Cc1[nH]cnc1C)C2	DDD01247121	6.10767	5.02175
UCSD-0796354	O=C(NC1COC2(C1)CCN(Cc1ccccn1)CC2)c1ccccn1	DDD01037187	-5.87	16.0128
UCSD-0800586	O=C(C1CCC1)N1C[C@H]([C@@H]2CN(CC[C@H]12)C1CCCC1)c1ccsc1	DDD01059151	-0.826667	18.3516
UCSD-0833367	Fc1cccc(OCc2nc(co2)C(=O)NCC(F)(F)F)c1	DDD01252579	7.51	3.50016
UCSD-0798641	Cc1nc(NCc2nccn2C)cc(n1)C1COCCN1	DDD01057204	-7.36667	24.8148
UCSD-0823475	C(Nc1ccccn1)c1cn2CCN(Cc3cccnc3)Cc2n1	DDD01084854	-9.71333	23.0067
UCSD-0823649	O=C(CC1CC1)NCc1cn2CCN(CC3CC3)Cc2n1	DDD01085030	3.62333	6.23824
UCSD-0795448	O=C(CC1CC1)N1C[C@@H]2CCN(C[C@@H]2C1)c1cnccn1	DDD01036281	-21.7333	31.5662
UCSD-0785012	CO[C@H]1COCCN(C1)C(=O)c1ccc(cc1)C(F)(F)F	DDD01025163	-9.45667	19.75
UCSD-0845006	O=C(NCc1ccc(cc1)-c1ccn[nH]1)N1CCC(C1)N1CCCC1	DDD01302099	-1.43	11.1126
UCSD-0801333	CC(=O)N1CCC(CC1)c1cnc(cn1)-c1c(C)nn(C)c1C	DDD01059898	6.323	5.70298
UCSD-0786096	CCN1CCC(=O)N(C)Cc2cc(F)ccc12	DDD01026283	-16.6	33.1718
UCSD-0845554	CN(C)c1cc(ccn1)C(=O)N1CCN(CC1)c1cnccn1	DDD01302782	-0.38	11.4881
UCSD-0784782	CN1CCOC[C@H]1c1nc(c[nH]1)-c1ccncc1	DDD01024933	-1.60133	12.9777
UCSD-0829731	COc1ccc(CN2CCCC3(CNC(=O)O3)CC2)cc1OC	DDD01248933	0.936667	8.15138
UCSD-0798508	CC(=O)N1CCC(Cc2cccc(n2)-c2ccnn2C)CC1	DDD01057071	-3.54633	16.4003
UCSD-0800104	Cc1n[nH]c(C)c1S(=O)(=O)N1CCC(CC1)Oc1cnccn1	DDD01058668	-7.93	23.8894
UCSD-0823650	Cc1cccc(n1)N1CC[C@@H]2CN(CCO[C@@H]2C1)C(=O)c1ccco1	DDD01085031	6.82667	4.47511
UCSD-0791273	CCOCC(=O)N1CC[C@H]2OCC[C@H]([C@H]2C1)c1nnc(C)o1	DDD01031777	6.50933	5.36019
UCSD-0800481	Cc1cccc(CNC(Cc2ccsc2)c2nccs2)n1	DDD01059046	-8.66667	22.4242
UCSD-0823542	CCN1C[C@@H]2C[C@@H]([C@H](C1)O2)C(=O)NCc1cccnc1	DDD01084921	7.30667	2.42259
UCSD-0832082	COCc1noc(Cn2c3ccccc3[nH]c2=O)n1	DDD01251290	-4.3	13.796
UCSD-0838192	COc1ccc(cc1)[C@@H]1CN(C[C@H]1NC(C)=O)C(=O)CCC(F)(F)F	DDD01257430	-4.96667	13.0791
UCSD-0799818	Cn1ccc(CN2CC(Cc3nccc4cc[nH]c34)C2)n1	DDD01058382	-5.00067	18.3336
UCSD-0802511	CC(C)N1CCC(C1)c1cc(nc(C)n1)-c1ccccc1C(O)=O	DDD01061076	1.39667	7.45654
UCSD-0788791	CN(C)CC(=O)N1CCC2(CN(Cc3ccccc3)C2)CC1	DDD01029295	-0.363333	9.06289
UCSD-0824234	COc1ccccc1Nc1nc2CN(CC(=O)c2s1)C(=O)CC(C)C	DDD01235953	3.793	5.52135
UCSD-0800480	CC1Cc2ccccc2N1C(=O)Cn1nc(ccc1=O)-c1cccs1	DDD01059045	-10.0633	21.3788
UCSD-0823582	O=C1CO[C@@H]2CN(CC3CCOCC3)C[C@H]2N1CC1CC1	DDD01084962	2.53	12.4978
UCSD-0833658	Cc1cc(C)n2nc(cc2n1)C(=O)N1CCCC2(CCOC2)C1	DDD01252873	-3.80667	11.8917
UCSD-0814507	CC(=O)N(CCc1ccccc1)CC(=O)NC1(CC1)C#N	DDD01075023	-14.83	27.7169
UCSD-0785892	Cc1nn(c(C)c1CCC(O)=O)-c1cc(Cl)cc(Cl)c1	DDD01026079	-8.08333	25.3656
UCSD-0790119	Cc1csc(CN2CC[C@@H]3[C@H](C2)OCCN(c2cccnc2)C3=O)n1	DDD01030623	8.43333	2.19976
UCSD-0824776	Cc1cc(C)c(C(=O)N2CCN(CC2)c2ncccc2C#N)c(=O)[nH]1	DDD01243970	-5.18	14.0185
UCSD-0789199	O=C([C@@H]1CSCN1)N1CCC2(CC1)CNCc1ccccc21	DDD01029703	2.13467	7.07858
UCSD-0824142	CN1CCN(CC2CC2)C(=O)c2cnc(nc12)N1CCOCC1	DDD01235861	-2.08333	14.2739
UCSD-0785241	CC(C)N[C@@H]1CO[C@H](CNC(=O)c2cccs2)[C@H]1O	DDD01025392	-21.0633	32.2315
UCSD-0799219	CCCn1nc(C)c(c1C)-c1cncn1CCN(C)C1CCCC1	DDD01057782	-3.75333	21.9681
UCSD-0784678	CC(=O)N1CCC(CC1)N1CC[C@@H](C1)c1nc2cc(F)ccc2o1	DDD01024829	7.12	2.52525
UCSD-0798738	Clc1ccc(OCCc2cc(n[nH]2)C2CCN(C2)c2ncccn2)cc1	DDD01057301	-10.83	32.4194
UCSD-0799517	CC(=O)NCc1cncc(n1)C1CCCN1C1CCOCC1	DDD01058080	3.59333	5.74589
UCSD-0794004	CC(C)NC(=O)N1CCCC2(CCN(Cc3cccc(C)n3)C2=O)C1	DDD01034509	6.48	2.94272
UCSD-0827557	CN1C[C@H]2CC[C@@H](C1)N(Cc1ccccc1OCCN1CCOCC1)C2	DDD01246755	-9.26333	16.5588
UCSD-0823935	O=C(N1C[C@H]2CCCN(Cc3cccs3)[C@H]2C1)c1ccco1	DDD01085319	2.36	9.14908
UCSD-0784887	CC(C)CC(=O)N[C@H](C)c1c(noc1C(O)=O)-c1ccc(Cl)cc1	DDD01025038	-5.79667	13.613
UCSD-0824127	COCC(=O)NCC[C@H]1CC(C)(C)Oc2ccc(OC)cc12	DDD01235846	-8.72333	19.4357
UCSD-0798989	CCn1c(CN2CCC(O)(CC2)c2ccc3OCOc3c2)cnc1SC	DDD01057552	2.90987	5.81276
UCSD-0798786	CN1CCC(CC1)C(=O)N1CCC(CC1)c1ccc2c(N)n[nH]c2n1	DDD01057349	-17.3033	24.1938
UCSD-0821528	COCC1CC2(CN1C(C)C)CCN(CC2)c1cc(OC)ncn1	DDD01082898	-10.19	21.1547
UCSD-0802593	CC(=O)N1CCC(Cc2cnc(cn2)-c2c(C)n[nH]c2C)C1	DDD01061158	4.56	5.81774
UCSD-0786467	O=S(=O)(C1CCS(=O)(=O)C1)c1cccc(c1)S(=O)(=O)N1CCOCC1	DDD01026803	-7.25667	22.9452
UCSD-0717027	CN(CC1=CN(C)N=C1)C(=O)C1=NN(CC2=CC=CC=C2)C(=O)C=C1	DDD01071731	0.428667	8.73501
UCSD-0800593	COc1cc2cc(C)c(SCCN3CCCC3)nc2cc1OC	DDD01059158	-7.05333	23.461
UCSD-0821228	O=C(Nc1cccnc1)[C@H]1CN(Cc2ccccn2)C[C@H]2OCC[C@@H]12	DDD01082592	-11.7833	35.0187
UCSD-0803954	Cc1ccc(cc1)C1CSCCN1C(=O)c1ccncc1	DDD01062716	-0.453333	8.61731
UCSD-0785828	Clc1cc(Cl)c2OC3(CCN(CC3)C(=O)c3ccccn3)CC(=O)c2c1	DDD01026015	-6.28667	21.7516
UCSD-0795423	O[C@@H]1CCN([C@H]1Cc1ccccc1)C(=O)C1CCOC1	DDD01036256	-7.05333	15.3672
UCSD-0798997	CS(=O)(=O)c1cc(Cl)cnc1C1CCN(CC1)C(=O)C1CC1	DDD01057560	-7.43667	26.6019
UCSD-0791065	Cn1cccc1C(=O)N1CCC2(CCCN2S(C)(=O)=O)CC1	DDD01031569	-0.0833333	12.7796
UCSD-0835411	CC(C)=CCN1C[C@@H]2CC[C@H]1CN(CCC(=O)NCc1ccco1)C2	DDD01254634	-8.76773	23.8781
UCSD-0784657	COc1ccccc1CN1C[C@@H](F)[C@H](C1)OCc1nc2ccccc2[nH]1	DDD01024808	-0.270333	10.1492
UCSD-0785300	CC1CCN(C[C@H]2CN3CC[C@H]2C[C@@H]3CNC(=O)Nc2ccsc2)CC1	DDD01025451	-8.16333	28.2925
UCSD-0828468	CCOc1ccc2[nH]c(=O)c(CN3CCC(CC3)n3cnnc3)cc2c1	DDD01247668	-10.2267	17.0533
UCSD-0818942	CCN(CC(=O)NC)C(=O)Cc1nc(oc1C)-c1ccco1	DDD01080066	5.714	4.47538
UCSD-0799898	Cc1ccc(CN[C@@H]2COC[C@H]2c2ccc(F)cc2)cc1C	DDD01058462	0.99	12.9319
UCSD-0823588	CN(C)C(=O)COC1COC2(C1)CCN(CC2)S(C)(=O)=O	DDD01084968	-6.20667	18.4061
UCSD-0799524	Cc1cc(NCC2CCCCC2)n2ncnc2n1	DDD01058087	-2.44533	13.5399
UCSD-0801511	CNC(=O)C1CN(Cc2c[nH]cn2)CCN(C1)C1CCOCC1	DDD01060076	1.9	11.9657
UCSD-0802256	CCN(CC)C(=O)Cn1c2cccnc2n(Cc2ccco2)c1=O	DDD01060821	-4	11.6809
UCSD-0823940	C(N1CCOCC2(CCN(C2)C2CCOCC2)C1)c1nccs1	DDD01085324	-1.72	17.4221
UCSD-0823899	CC(=O)N1CCOC2(CCN(CC2)C(=O)c2cnoc2C)C1	DDD01085283	-4.3	11.9851
UCSD-0786751	O=C1CCC(=NN1CN1CCCCCC1)c1ccccc1	DDD01027254	-14.91	35.4543
UCSD-0790825	CN1CC2(CCN(Cc3cccnc3)CC2)c2cccc(F)c12	DDD01031329	-4.65667	21.242
UCSD-0785471	O[C@H]1Cc2c(O)cc(O)cc2O[C@@H]1c1ccc(O)cc1	DDD01025622	-4.83	12.3772
UCSD-0785343	COc1ccccc1-c1nnc(o1)[C@H]1CCN(C1)C(C)=O	DDD01025494	-6.95333	15.1625
UCSD-0803969	COc1ccccc1C1(CNC(=O)NCc2noc(C)n2)CC1	DDD01062731	-9.3	16.8369
UCSD-0798035	CC(C)N(C(C)C)C(=O)Cn1c(cc2cccnc12)-c1ccco1	DDD01056598	0.686667	9.57207
UCSD-0803818	CC(C)OCCS(=O)(=O)N1CCN(Cc2ccco2)CC1	DDD01062561	-9.94333	21.0273
UCSD-0835025	COCCN(C)C[C@H]1CC[C@@H](Cc2ccc3n(C)ncc3c2)O1	DDD01254244	-8.73	30.2032
UCSD-0839247	Oc1cc(CSc2nc3CCCCCc3cc2C#N)nc(O)n1	DDD01259501	-0.593333	14.4608
UCSD-0802135	CN1CCCC(C1)c1cccc(CCC(=O)NCC2(C)COC2)n1	DDD01060700	-3.15333	18.5629
UCSD-0785870	CN(Cc1ccccc1)C(=O)C1OC(=NN1C(C)=O)c1ccccc1	DDD01026057	-18.2733	30.3723
UCSD-0845655	COCCc1noc(CN2CCCCC2Cn2cc(C)cn2)n1	DDD01302908	-4.74	12.148
UCSD-0845421	Cn1ccc(cc1=O)C(=O)N1CCN(CC1)c1cc(ccn1)C#N	DDD01302614	-8.18	19.1367
UCSD-0839545	CCCc1cc(no1)C(=O)N1CCOC(C1)c1nc(no1)-c1cccs1	DDD01270301	0.195	8.5069
UCSD-0733954	CN(C)C(=O)CN1C=C(N=N1)C(=O)N1CCCC2=C1C(F)=CC=C2	DDD01072877	-13.1633	22.5086
UCSD-0800297	COCC(=O)N1CCC(O)(CN2CCN(CC2)c2ccccc2)C1	DDD01058861	-12.1733	27.187
UCSD-0825468	CN(Cc1ccon1)C(=O)CN1C(=O)OC(C)(C)C1=O	DDD01244663	0.0866667	7.82161
UCSD-0845541	O=C(Nc1cccc2CCCCc12)C1CCCN1c1nccs1	DDD01302765	-8.04	14.86
UCSD-0839471	Cc1cncc(n1)C1CCCN(C1)C(=O)c1ccc(C)[nH]c1=O	DDD01270227	-2.77667	11.0422
UCSD-0799534	CS(=O)(=O)c1cncnc1C1CCCN(C1)C(=O)Nc1ccccc1F	DDD01058097	2.20333	9.26394
UCSD-0844405	COc1ccc(CCCC(=O)N2CCCC(C2)n2cccn2)cc1	DDD01301293	-0.196667	8.15862
UCSD-0844413	COc1ccc(NC(=O)N2CCCCCC2c2ccncc2)cn1	DDD01301302	-5.72667	13.1905
UCSD-0792966	O=C(N[C@@H]1CN(Cc2cccs2)[C@@H]2CCCO[C@H]12)c1cscn1	DDD01033471	2.00667	10.6909
UCSD-0846615	CC(C)Oc1ccccc1CNC(=O)N1CCC(CC1)n1cncn1	DDD01304156	1.70333	8.60194
UCSD-0836388	CC(C)N1C[C@H](NS(=O)(=O)N2CCOCC2)[C@H](C1)c1ccc(C)o1	DDD01255613	-10.98	24.4842
UCSD-0839147	CCC(NC(=O)c1nn(C)cc1C(O)=O)c1ccccc1	DDD01259400	-5.24333	13.1167
UCSD-0786182	CSc1ccc(cc1)C(=O)N1CC(O)CN(Cc2cccs2)C(=O)C1	DDD01026369	-17.3467	24.9207
UCSD-0799310	CN1CCc2nc3cc(ccc3c(=O)n2CC1)C(=O)NCc1cccs1	DDD01057873	-13.1167	19.1391
UCSD-0785011	Clc1ccc(cc1)S(=O)(=O)N1CCOC[C@@H](C1)Oc1cnccn1	DDD01025162	-10.3533	16.759
UCSD-0792509	CO[C@@H]1CCN(C[C@@H]1Cc1ccc(OC)cc1)c1cc(OC)ncn1	DDD01033014	-4.77	15.5684
UCSD-0805146	Clc1cccc(C(=O)NCCN2CCCCCC2)c1Cl	DDD01064060	-0.556667	12.1057
UCSD-0795426	Cc1ccc(cc1)C(=O)N1CCC2(CC(C2)N2CCCC2)CC1	DDD01036259	-21.5667	47.9183
UCSD-0794015	Cn1cc(C[C@H]2[C@H](O)CCN2C(=O)C2CCOCC2)cn1	DDD01034520	-4.84333	11.8778
UCSD-0812619	COCCCC(=O)N(CCC(O)=O)Cc1ccc(F)c(F)c1	DDD01072876	-7.15	18.3696
UCSD-0799078	Cc1c(cnn1C)S(=O)(=O)N1CCCC1c1nnc(o1)-c1ccsc1	DDD01057641	-1.16	8.68385
UCSD-0839488	CCOc1ccccc1C(=O)N1CCCC1c1ncc2CNCCc2n1	DDD01270244	-8.85667	18.9832
UCSD-0785947	CN1CCCN(CC1)c1ncnc(N2CCOCC2)c1N	DDD01026134	-8.45667	15.3519
UCSD-0846323	CN(Cc1ccc2OCCOc2c1)C(=O)Cn1ccccc1=O	DDD01303783	-3.88367	14.5159
UCSD-0844412	Cn1cnnc1C1CCCN(C1)C(=O)CCc1ccc2OCOc2c1	DDD01301301	-1.15667	9.07781
UCSD-0798981	CSc1nnc(C2CCN(CC2)C(=O)N2CCCC2)n1C(C)C	DDD01057544	0.496667	12.8469
UCSD-0799301	CC(C(=O)NC1CC1)n1nc(cc(N)c1=O)-c1cccs1	DDD01057864	-7.61333	25.0117
UCSD-0651961	O=C(N(CC1CC1)C1=CC=CN=C1)C1=CC=CC=C1	DDD01026690	3.14667	5.36796
UCSD-0799519	CC(=O)N1CCCC(C1)c1nnc2CN(CCn12)C(=O)C1CCCCC1	DDD01058082	-12.2067	23.6693
UCSD-0788407	CNC(=O)CN1C(=O)CCC11CCCN(Cc2cccc(F)c2)C1	DDD01028911	-1.34067	10.3098
UCSD-0823535	CS(=O)(=O)N[C@@H]1CCO[C@]2(CCN(C2)C(=O)C2=CCCC2)C1	DDD01084914	-0.673333	15.8727
UCSD-0821302	Cc1cccc(CN2CC[C@@H]3[C@@H]2CCN3C(=O)Cc2cccs2)n1	DDD01082668	-12.15	25.7214
UCSD-0828135	CCCOCCN1CCc2[nH]c(nc2C1)-c1ccccc1	DDD01247335	1.78607	6.1737
UCSD-0784642	C(C1CC1)N1CC[C@@H](C1)c1nnc(Cc2c[nH]c3ccccc23)o1	DDD01024793	-7.28	13.8609
UCSD-0792802	Cn1ccnc1CN1CCC2(CCN(Cc3ccoc3)C2)CC1	DDD01033307	2.63	9.46522
UCSD-0810924	CN(Cc1ccc(Cl)s1)C(=O)c1ccccc1OCC(N)=O	DDD01070834	-10.1577	25.2057
UCSD-0786118	COC1CN(CCO)S(=O)(=O)c2ccccc12	DDD01026305	-19.0133	37.347
UCSD-0845548	COc1cccc(c1)-n1nnc(C(=O)N2CCCC2)c1C	DDD01302774	0.986667	6.62314
UCSD-0839501	O[C@H]1CCN(CC[C@@H]1N1CCOCC1)C(=O)c1ccc(F)cc1F	DDD01270257	-2.46333	9.58001
UCSD-0834734	Cc1cccnc1CN1CCOC(Cc2cccc3ccccc23)C1	DDD01253952	-4.25	12.001
UCSD-0823925	Cn1cc(CN2CCC3(CC(C(=O)N3)c3ccncc3)CC2)cn1	DDD01085309	-1.17333	14.4699
UCSD-0827344	COC(C)(C)C(=O)N[C@H]1CN(C[C@@H]1C(C)C)c1ncccc1C(N)=O	DDD01246542	-8.27667	14.6174
UCSD-0789433	C(Nc1ncccn1)c1n[nH]c2CN(Cc3ccncc3)CCc12	DDD01029937	6.52	1.78429
UCSD-0832937	CSCCC(O)C(=O)N1CCCN(Cc2cccnc2)CC1	DDD01252147	-3.1	19.3186
UCSD-0784937	CN1C[C@H](C[C@H]1c1nc(C)no1)NS(=O)(=O)Cc1ccccc1	DDD01025088	2.10667	5.82706
UCSD-0846033	C(N1CCCC1Cn1cncn1)c1ccccn1	DDD01303419	-6.73667	13.9561
UCSD-0785949	Nc1c(ncnc1N1CCOCC1)N1CCOCC1	DDD01026136	-16.85	32.7978
UCSD-0801823	CC(=O)NCC(=O)N1C[C@@H]2CC[C@H](Oc3ccccc3Cl)[C@@H]2C1	DDD01060388	-5.72667	16.0195
UCSD-0834024	CSCCC1N(Cc2ccccc2C(F)(F)F)CCc2[nH]cnc12	DDD01253239	-9.95	15.992
UCSD-0796241	CO[C@@H]1CO[C@@]2(CCN(Cc3ccccc3OC)C2)C1	DDD01037074	6.39	1.78581
UCSD-0785034	CS(=O)(=O)c1ccc(O[C@H]2COCCN(C2)C(=O)c2ccno2)cc1	DDD01025185	-8.98667	21.2783
UCSD-0611962	CN(CC1=CC=CS1)C(=O)CN1CCOC(CN2C=C(C)C=N2)C1	DDD01303807	-5.75333	13.366
UCSD-0809932	CCN(C(=O)CN1CCn2c(CC)nnc2C1)C1=CCCCC1	DDD01069633	5.31	2.80854
UCSD-0805293	CC(C)(C)CC1CCCN1Cc1nc(no1)-c1ccco1	DDD01064229	-12.0233	25.644
UCSD-0603920	CC(C)N(C)C(=O)COC1=NC(=NO1)C(C)C	DDD01069069	-12.37	18.1729
UCSD-0786548	Cc1nc(NC(=O)c2c(C)c(C)sc2-n2cnnn2)sc1C	DDD01026933	-19.44	35.1839
UCSD-0821762	Fc1cccc(CC(=O)N2CCn3cc(Cn4cccn4)nc3C2)c1	DDD01083133	-25.22	33.9774
UCSD-0599436	CC(=O)NCCNC(=O)C1=NN(C(=N1)C1CC1)C1=C(Cl)C=CC=C1	DDD01062709	-12.8567	20.7311
UCSD-0792230	CC1N(CC2CCC2)CCn2c(CNC(=O)C3CC3)cnc12	DDD01032734	-4.23667	11.0541
UCSD-0793520	Cc1nc(CN2C[C@H]3CN(C[C@H]3C2)C(=O)c2ccoc2C)cs1	DDD01034025	-7.73333	18.1964
UCSD-0816557	COCCN1CCC(CC1)Nc1ccc(cc1F)C#N	DDD01077394	-11.42	23.6968
UCSD-0828312	CN(C[C@@H]1CCCN2CCCC[C@H]12)Cc1cnn(c1)-c1ccccc1C	DDD01247512	3.41667	6.24201
UCSD-0785896	OC(=O)[C@@H]1CCCN1c1nccc(Nc2ccccc2)n1	DDD01026083	-12.15	22.6569
UCSD-0824097	OCCNc1nccc(n1)-c1c[nH]nc1-c1cccnc1	DDD01235816	1.72333	9.47057
UCSD-0821227	O=C(N1CCC2(C1)CCCN(C2)c1nncs1)c1ccccn1	DDD01082591	5.1414	4.45625
UCSD-0846308	CCn1ccnc1CN1CCC(C1)N(C)Cc1ncc(C)o1	DDD01303768	0.71	9.0957
UCSD-0826828	CO[C@H]1COC[C@@H]1NC(=O)C1(CCNCC1)Oc1ccc(Cl)cc1	DDD01246023	-3.34667	15.1651
UCSD-0794974	COc1ccc(C(=O)NCCCn2ccnc2)c(OC)n1	DDD01035738	-29.58	41.5844
UCSD-0800202	CCN1CCCC1CNCc1cc2cc(OC)ccc2[nH]c1=O	DDD01058766	-8.69667	16.6869
UCSD-0791726	CO[C@H]1CN([C@@H]2COC[C@H]12)C(=O)c1ccc[nH]1	DDD01032230	-12.4865	29.0587
UCSD-0799617	CN(C)c1ncc(CN2CCC(O)(CC2)c2ccccc2F)cn1	DDD01058181	-11.7367	29.2418
UCSD-0801011	CNC(=O)c1cn[nH]c1C1(C)CCCN(Cc2nccn2C(C)C)C1	DDD01059576	-1.42	12.4657
UCSD-0823714	CC(C)Nc1nc(nc2CCN(Cc3ccoc3)Cc12)N1CCOCC1	DDD01085096	-1.13	10.5638
UCSD-0799072	CC(NC(=O)CCn1c2ccccc2oc1=O)c1ccccn1	DDD01057635	-9.68633	23.572
UCSD-0784546	Cc1cc(no1)C(=O)NCc1ccccn1	DDD00042773	-7.77333	17.7576
UCSD-0794087	Fc1cnc(nc1)N1CCC2(CCC(=O)N2Cc2ccncc2)CC1	DDD01034592	-1.80667	9.21534
UCSD-0786062	CO[C@@H]1[C@@H](C(=O)Nc2ccccc2)C2(CCNCC2)N(C)C1=O	DDD01026249	-13.07	31.6116
UCSD-0814322	CC(C)n1nc2CCN(Cc3ccc(cc3)-n3cccn3)Cc2cc1=O	DDD01074815	-10.4467	16.4584
UCSD-0812666	CC1COc2ccccc2N1C(=O)c1ccc(=O)n(C)c1	DDD01072927	-2.89667	12.6523
UCSD-0846975	CC(CNC(=O)N(C)Cc1cc(C)on1)N1CCc2ccccc12	DDD01304618	-6.18667	12.8259
UCSD-0845821	Cc1nc2ccccc2c(=O)n1CCC(=O)N1CCSCC1	DDD01303124	1.69	5.56855
UCSD-0785102	COCCN1[C@@H]2CN(CCCc3ccccc3)C[C@@H]2OCC1=O	DDD01025253	-4.88333	12.4842
UCSD-0824189	CC(=O)N1CCC(CC1)n1nccc1-c1cnc(nc1)N1CCCC1	DDD01235908	0.842333	6.61501
UCSD-0793301	COCCN1C[C@H](OCc2csc(C)n2)[C@H]2COC[C@@H]12	DDD01033806	1.09067	6.93053
UCSD-0786109	OC12CCC(CC1)N(C2CN1CCOCC1)C(=O)c1ccco1	DDD01026296	-14.6333	34.5526
UCSD-0791914	CN(C)Cc1nn(C)c2CN(Cc12)C(=O)c1cccc(c1)C#N	DDD01032418	-6.05667	12.1998
UCSD-0795357	O=C1CC2(CCN(C2)S(=O)(=O)c2cccs2)CN1c1ccccc1	DDD01036190	-1.93333	9.29341
UCSD-0798787	O=C(CCn1cccn1)N1CCC(CC1)c1nnc(o1)-c1ccccn1	DDD01057350	-5.53667	18.955
UCSD-0792799	O=C1N(CCC11CCCN(Cc2ccoc2)C1)c1cccnc1	DDD01033304	-1.85333	12.4874
UCSD-0796276	O=C(C1CCOCC1)N1CC[C@H]2[C@@H]1CCC(=O)N2Cc1ccncc1	DDD01037109	-8.67	16.7869
UCSD-0786120	CCOC(=O)[C@@H]1CN2CCNC[C@@H]2[C@H]1c1ccccc1	DDD01026307	-4.49667	21.2215
UCSD-0799816	Cc1ccc(cc1)-c1cc(nc(C)n1)C1CCNCC1	DDD01058380	-15.48	22.9938
UCSD-0786170	CSc1ccc(cc1)C(=O)N1CC(O)CN(CC(C)(C)C)C(=O)C1	DDD01026357	-17.31	33.7918
UCSD-0798768	COc1ccc(OCCc2cc(n[nH]2)C2CCN(CC(C)C)C2)cc1	DDD01057331	3.89333	4.53202
UCSD-0840987	Cn1cc(cn1)C1CCCN1C(=O)c1cn(nn1)-c1ccccc1	DDD01296949	1.35233	5.7706
UCSD-0811680	CCCN(CC(F)F)C(=O)CCc1c(C)nc2cc(O)nn2c1C	DDD01071739	-20.5867	26.8033
UCSD-0786114	Clc1ccc(cc1)-c1cnc2NCCC(=O)N(Cc2c1)C1CC1	DDD01026301	-26.62	45.1269
UCSD-0784543	CCc1cc2cc(OC)c(OC)cc2nc1SCCN1CCCCC1	DDD00030916	-3.47667	15.0052
UCSD-0788746	O=C([C@H]1CCCO1)N1C[C@H]2CN(CC3CC3)C(=O)[C@H]2C1	DDD01029250	-14.5567	20.7696
UCSD-0819650	Fc1cccc(F)c1C(=O)NCc1ccc(OCC2CC2)nc1	DDD01080919	-9.26667	17.5068
UCSD-0798990	CS(=O)(=O)c1cc(Cl)cnc1C1CCCN(C1)C(=O)C1CCOCC1	DDD01057553	-1.96	14.2366
UCSD-0846255	NC(=O)NC(=O)CCN1CCCN(CC1)c1nccs1	DDD01303707	2.35667	6.46786
UCSD-0823979	COC[C@@H]1CC[C@H]2[C@H](CCN2S(=O)(=O)c2cccc(C)c2)O1	DDD01085363	-1.44333	8.48322
UCSD-0799307	O=C(Cn1cnc2cc3OCCCOc3cc12)NC1CCCCC1	DDD01057870	-10.49	19.182
UCSD-0824046	CCC(CC)C(=O)N1CCC2(C1)CN(C(=O)CN2C)c1ccccc1	DDD01085430	-7.2	14.7093
UCSD-0839546	CCn1cc(CN2CCCC(C2)c2[nH]ncc2S(C)(=O)=O)cn1	DDD01270302	-6.36667	12.1837
UCSD-0824070	C[C@H](O)CNc1cc(ncn1)-c1ccccc1	DDD01235789	0.343333	7.67242
UCSD-0820866	O=C(N1CC[C@@H]2CN(CCO[C@@H]2C1)C1CCOCC1)c1ccncc1	DDD01082225	-21.6433	36.6301
UCSD-0802979	CN1CCN(CC1)c1ncccc1N	DDD01061561	1.975	5.29348
UCSD-0808352	COc1ccnc(n1)N1CCCN(CC1)c1nc(ns1)C1CC1	DDD01067749	-8.81	17.6381
UCSD-0784714	Cc1ccc(cc1)-c1c[nH]c(n1)[C@@H]1COCCN1Cc1ncc[nH]1	DDD01024865	-1.54667	8.99396
UCSD-0826925	COCCN1CCCC2(CCN(C2)c2cccc(n2)C(F)(F)F)C1=O	DDD01246120	-19.1133	28.228
UCSD-0824010	CN(C)CCN1CCCC11CCN(CC1)C(=O)c1cccn1C	DDD01085394	-2.30333	8.66358
UCSD-0838716	CCn1nc(C)c(CCNC(=O)C2CCCN(C2)C(=O)N(C)C)c1C	DDD01257954	-5.51	12.0767
UCSD-0802445	CC(=O)NC[C@]1(O)CCN(C[C@H]1O)C(=O)c1ccc2CCCc2c1	DDD01061010	-14.7367	19.9467
UCSD-0712568	CC1=C(NCC(=O)N2CCOCC2)C=CC(=C1)C(=O)N1CCCC1	DDD01295509	-4.02667	10.1367
UCSD-0834688	CN(C[C@H]1CC[C@@H](Cc2ccc3n(C)ncc3c2)O1)Cc1cccnc1	DDD01253906	-9.67333	20.128
UCSD-0823232	Cn1cc(CN2CCCC22CCN(CC2)C(=O)c2ccncc2)cn1	DDD01084610	3.81267	3.51105
UCSD-0839239	COc1ccc(CNCc2cn(C)nc2C)cc1	DDD01259493	-5.358	16.5295
UCSD-0800785	FC(F)c1cc2cccnc2n1CCC(=O)NC1CCCCC1	DDD01059350	-6.83333	20.4102
UCSD-0785963	CC(C)(Oc1ccc(cc1)C(N)=O)C(=O)N(CCC#N)CC1CCCO1	DDD01026150	-3.17	9.52122
UCSD-0820438	CN(C)[C@@H]1CN([C@@H]2CCCO[C@H]12)C(=O)Cc1cccs1	DDD01081794	-6.76333	23.1715
UCSD-0834357	COC(=O)[C@H]1C[C@@H](O)CCN1S(=O)(=O)c1ccc(F)cc1F	DDD01253573	-2.96667	16.8447
UCSD-0791767	COCCNC(=O)[C@@H]1C[C@@H]2CCN(C[C@H]2O1)c1ncccn1	DDD01032271	-13.5333	27.074
UCSD-0846339	CCNc1cc2CN(CCc2nn1)C(=O)c1cc2nc(C)ccc2o1	DDD01303813	-8.92333	15.1216
UCSD-0790038	CCCS(=O)(=O)N1C[C@@H]2COC[C@@H](Cc3nc(C)no3)[C@@H]2C1	DDD01030542	-2.01253	10.5468
UCSD-0757476	CN1N=CC(CC(C#N)C(=O)NC2=CC(O)=CC=C2)=C1C	DDD01026970	-9.19667	20.0708
UCSD-0798729	CC(C)C(=O)N1CCOC(CCc2cc(ncn2)-c2c(C)noc2C)C1	DDD01057292	-3.32746	12.7368
UCSD-0822316	Cc1cncc(c1)C(=O)N1CCO[C@H]2[C@@H](CC[C@H]12)Oc1ccccn1	DDD01083690	-8.64667	19.5355
UCSD-0799390	O=C(CN1CCCCCC1)N1CCc2nnc(C3CCCNC3)n2CC1	DDD01057953	-1.33	10.1719
UCSD-0792965	Cn1cc(CN2C[C@@H](NC(=O)c3cscn3)[C@H]3OCCC[C@@H]23)cn1	DDD01033470	-9.25333	17.3274
UCSD-0787751	Cn1nc(ccc1=O)N1CCCC(C1)C(=O)Nc1nccs1	DDD01028255	-7.40667	23.3271
UCSD-0821085	C(OC[C@]12COC[C@H]1CN(C2)C1CCC1)C1CCOCC1	DDD01082449	1.48333	5.62061
UCSD-0785298	O=C(NC[C@H]1C[C@@H]2CCN1C[C@@H]2CN1CCCCC1)Nc1ccsc1	DDD01025449	-6.51	13.5214
UCSD-0786112	COc1ccc(cc1)-c1cnc2NCCC(=O)N(Cc2c1)C1CC1	DDD01026299	-18.5867	43.6647
UCSD-0695811	CC1=NC(CNC(=O)NCC(O)C2=C(F)C=C(F)C=C2)=CS1	DDD01303699	-1.683	9.36719
UCSD-0822878	CC(C)NC(=O)C1CN(CC11CCOCC1)C(=O)Nc1ccc(F)cc1	DDD01084255	-25.57	33.3556
UCSD-0837516	CN1CCCC2(CCN(C2)C(=O)Cc2cc3OCCOc3cc2Cl)C1=O	DDD01256752	-3.06333	10.0942
UCSD-0811420	Cc1ccc(c(F)c1)S(=O)(=O)NCCCN1CCC(O)CC1	DDD01071432	-10.56	22.976
UCSD-0824058	CN1CC(=O)N(CC11CCN(C1)C(=O)c1ccccc1)c1ccsc1	DDD01085442	5.03	2.04135
UCSD-0798901	Cc1cc(nc(n1)C1(C)CCCN1CC(N)=O)C(F)(F)F	DDD01057464	-9.53	14.4973
UCSD-0799991	Cc1c(CCC(=O)N2CCOC(C2)c2cnccn2)cnn1C	DDD01058555	-13.3733	27.4942
UCSD-0828395	CN1CCC(CC1)N1CCCC(C1)C(=O)N1Cc2ccccc2C1	DDD01247595	0.753333	7.96659
UCSD-0802569	CC(=O)N1CCCC(C1)c1ccc(Nc2nc(C)cc(C)n2)cn1	DDD01061134	-8.98	15.6102
UCSD-0791274	Cc1nnc(o1)[C@@H]1CCO[C@@H]2CCN(C[C@H]12)C(=O)Cc1ccccn1	DDD01031778	-1.73333	7.97335
UCSD-0800105	Cc1n[nH]c(C)c1S(=O)(=O)N1CCC(CC1)Oc1ccccc1C	DDD01058669	-10.4967	21.3972
UCSD-0785804	CN(C)C(=O)c1cccnc1SCc1ccccc1C	DDD01025991	-5.55333	10.9946
UCSD-0820642	CC(C)NC(=O)N1CC[C@H]2N(C)CC[C@]2(CC1)C(=O)Nc1cccnc1	DDD01081998	-24.2267	29.2164
UCSD-0786082	CC(C)(C)C(=O)N1CC(O)CN(Cc2ccco2)C(=O)C1	DDD01026269	-9.295	23.2459
UCSD-0820939	CCOCC(=O)N1CCC2(CC(CO2)c2ccccc2)CC1	DDD01082298	-13.9433	31.8606
UCSD-0785308	CC(=O)N1CC[C@H]2CC(=O)N(Cc3ccc4OCOc4c3)CC[C@H]2C1	DDD01025459	0.33	8.18915
UCSD-0785957	CCN(CC)CCNC(=O)CCc1c(C)nn(c1C)-c1ccccc1Br	DDD01026144	1.286	5.13245
UCSD-0845479	CS(=O)(=O)Cc1cccc(c1)C(=O)N1CCCC(C1)n1cccn1	DDD01302684	-6.61	11.9029
UCSD-0794003	C(C1CN(Cc2nccn2C1)C1CCOCC1)N1CCCC1	DDD01034508	-1.28	7.6399
UCSD-0788196	COC(=O)C1CCCN1Cc1ccco1	DDD01028700	3.81333	4.97148
UCSD-0786873	CC(C)c1sc(Cl)nc1C(=O)N1CCN(CC1)c1ccccn1	DDD01027377	-24.93	43.4489
UCSD-0837035	Cc1ccccc1CC(=O)N1CCc2c(C1)ncnc2N1CCOCC1	DDD01256270	-11.9867	16.5868
UCSD-0784649	F[C@@H]1CN(CC2CC2)C[C@@H]1OCc1nc2cnccc2[nH]1	DDD01024800	-4.13	10.5742
UCSD-0799211	CNc1cc(nc(C)n1)C1CN(Cc2cccnc2NC)CCO1	DDD01057774	-8.83333	24.7067
UCSD-0842211	CS(=O)(=O)NCCN1CCCC1c1ccc(Cl)cc1	DDD01298535	2.57667	5.63895
UCSD-0838968	CCN1CCN(CC(=O)Nc2sc(C)c(CC)c2C(=O)OC)CC1	DDD01258206	-2.39667	13.4469
UCSD-0785460	CNC(=O)C(C)(C)N1CCC[C@H]1C(=O)NCCN(C)C	DDD01025611	-3.54333	9.21289
UCSD-0795424	Cc1cccc(CN2C(=O)CCC22CCN(CC2)c2ncc(F)cn2)n1	DDD01036257	-4.02667	15.0665
UCSD-0823707	O=C(NC[C@]12COC[C@H]1CN(C2)C1CCOCC1)c1ccco1	DDD01085089	2.65667	4.14965
UCSD-0800507	OC1CCN(CC1)C(=O)Cn1cccc2cc(nc12)-c1ccc(F)cc1	DDD01059072	-8.64433	20.9842
UCSD-0784847	O[C@H]1[C@@H](CO[C@@H]1CNC(=O)c1ccncc1)NCc1ccc(F)cc1	DDD01024998	-14.68	19.5312
UCSD-0798721	COc1ccccc1CN(C)Cc1ccnc(n1)C1CCCO1	DDD01057284	-14.27	28.8348
UCSD-0794860	CCC(CO)NCc1ccc(o1)-c1ccc(F)cc1	DDD01035586	2.61333	4.04357
UCSD-0798690	CCC1CCCCN1C(=O)Cn1nc(cc(N)c1=O)-c1ccc(C)o1	DDD01057253	-4.57	16.6008
UCSD-0803945	CN(Cc1ccccc1)Cn1cc(C)n(-c2cc(C)on2)c1=O	DDD01062700	-4.23333	9.74008
UCSD-0786404	CCOC(=O)CSc1nnc(o1)[C@@H](N)CC(C)C	DDD01026658	0.24	6.10199
UCSD-0845818	CC(C)c1ccc(OCCC(=O)N2CCN(CC2)C(C)=O)cc1	DDD01303120	-7.86	12.8709
UCSD-0844418	C(NC1CCCN(C1)c1ncccn1)c1ccc(cc1)-n1ccnc1	DDD01301308	-7.99667	14.7091
UCSD-0791845	CCCS(=O)(=O)N1C[C@@H](Oc2ncccc2F)[C@H]2OCCC[C@@H]12	DDD01032349	-7.29333	15.0649
UCSD-0823946	Cc1cnc(cn1)C(=O)N1C[C@@H]2CN(CC3CCCC3)CCO[C@@H]2C1	DDD01085330	-8.33	17.2098
UCSD-0824112	Nc1ncc(cn1)-c1cccc(NC(=O)[C@@H]2CCCCN2)c1	DDD01235831	-5.60333	11.5464
UCSD-0823943	Cc1cccc(CN2C[C@@H]3COC[C@]3(CNC(=O)N3CCCC3)C2)n1	DDD01085327	0.48	6.88826
UCSD-0800009	Fc1ccc(Oc2nccnc2C2CCN(CC2)C2CCOCC2)cc1	DDD01058573	-5.18333	20.2822
UCSD-0823592	CCN(C)c1ncnc2CCN(Cc3csc(C)n3)CCc12	DDD01084972	2.59	6.53168
UCSD-0785836	CN(C)C(=O)CN1CCC2(CC1)CC(=O)c1ccc3ccccc3c1O2	DDD01026023	-4.19	15.8076
UCSD-0839529	COc1ncc(c(OC)n1)C1(O)CCN(Cc2cccs2)CC1	DDD01270285	-3.68933	12.9151
UCSD-0798648	COc1cc(cc(OC)c1OC)[C@@H]1N[C@@H](Cc2ccsc12)c1nccs1	DDD01057211	-9.72	14.347
UCSD-0815180	CN1CCN(CC1)c1cccc(Cl)c1CNCCS(C)(=O)=O	DDD01075798	-6.99	13.6625
UCSD-0794108	CS(=O)(=O)N1C[C@@H](Oc2ccccn2)[C@H]2OCCC[C@@H]12	DDD01034613	-9.32667	14.7206
UCSD-0795428	CC(C)CN1CCN(C)C2(CCN(Cc3ccsc3)CC2)C1=O	DDD01036261	1.55667	7.66597
UCSD-0725050	CN(C)C1=NC=CC(=C1)C(=O)N(C)CC1=NOC(C)=C1	DDD01303871	-6.4	11.7235
UCSD-0798819	O[C@@H]1CN(Cc2ccc(F)cc2)CC[C@H]1NCc1ccccn1	DDD01057382	-12.76	26.1773
UCSD-0824632	COCCN(C)C(C(O)=O)c1ccc2ccccc2c1	DDD01243825	-19.97	27.4171
UCSD-0795443	COc1ccc(CN2CCN(CC3(CN(C)C(=O)C3)C2)C(C)=O)cc1	DDD01036276	-6.95	17.169
UCSD-0821458	Fc1cccc(c1)N1CC2(COCCN(C2)c2cnccn2)OCC1=O	DDD01082826	-10.1233	25.2105
UCSD-0785199	Fc1ccc(CN2C[C@H]3CN(CCN3C2=O)C(=O)c2ccno2)cc1	DDD01025350	-16.63	29.8155
UCSD-0840951	CC(=O)N(Cc1noc(n1)C1CC1)C1CCN(Cc2ccccc2)C1	DDD01296900	2.28667	5.93215
UCSD-0803555	COCCCS(=O)(=O)N1CCN(CC1)C(C)(C)CO	DDD01062259	-4.38667	10.5036
UCSD-0803035	CN(C)c1nc2ncc(Cl)cc2cc1C#N	DDD01061617	-6.81333	12.1073
UCSD-0802533	CN(C)C(=O)CN1CCCCC1c1nc(N)ncc1-c1cccc(F)c1	DDD01061098	1.55367	4.51692
UCSD-0786126	CCOC(=O)[C@@H]1[C@H]2CN(CCN2C[C@H]1c1ccccc1)C(=O)OC	DDD01026313	-5.25	17.9617
UCSD-0785472	OC1CCn2c1nc1ccccc1c2=O	DDD01025623	-7.91667	18.2084
UCSD-0793691	COCC(=O)N1CCN(CC2(CN(C)C(=O)C2)C1)C(=O)NC(C)C	DDD01034196	-7.32	12.3647
UCSD-0825868	CCOC(=O)c1ccc(nc1)N1CCN(Cc2c(C)nn(C)c2Cl)CC1	DDD01245063	-9.08667	13.9894
UCSD-0832043	CC[C@@]1(O)CCN(C[C@H]1O)C(=O)c1ccc(CN2CCCCCC2)cc1	DDD01251251	-4.89333	10.5312
UCSD-0832570	CS(=O)(=O)NCCC1CCCN(Cc2ccccc2F)C1	DDD01251779	-4.99	11.2063
UCSD-0822480	O=C(N1CCC[C@]2(C[C@@H](CO2)OCC2CC2)C1)c1ccncn1	DDD01083854	-6.02667	11.0503
UCSD-0785912	CCOc1ccc(NC(=O)C2OC(=NN2C(C)=O)c2cccs2)cc1	DDD01026099	-10.7667	19.0017
UCSD-0823191	COCC1CC2(CN1C(C)C)CCN(Cc1cccnc1)CC2	DDD01084569	-16.7867	29.6453
UCSD-0794006	C(N1CCOC2(C1)COCCN(C2)c1ncccn1)c1nccs1	DDD01034511	-2.49333	13.9945
UCSD-0829094	CN(C)C(C(=O)N1CCCN(CC1)C(=O)C1CCC1)c1ccccc1F	DDD01248296	-3.71033	12.1002
UCSD-0823950	Cc1noc(C)c1C(=O)N1CC[C@H]2C[C@H](O[C@@H]2C1)c1ccncn1	DDD01085334	-7.79433	19.7533
UCSD-0823880	Cc1ccc(nn1)N1CC[C@H]2O[C@H](CC[C@@H]12)C(=O)NCc1ccco1	DDD01085264	-0.0533333	7.75741
UCSD-0788752	Fc1cccc(c1)N1CC2(CCN(C2)S(=O)(=O)c2cccs2)CC1=O	DDD01029256	-5.48	13.6006
UCSD-0839495	CC(C)c1cc(C(=O)N(C)Cc2cccc3ncccc23)n(C)n1	DDD01270251	-1.82	8.5482
UCSD-0847348	Cn1nc2CCN(Cc3nnc(o3)C3CC3)Cc2cc1=O	DDD01305084	2.69	6.04215
UCSD-0793694	CCN1CC2(CC1=O)CN(Cc1ccco1)CCN(C2)C(=O)C(C)C	DDD01034199	-1.96117	9.6278
UCSD-0820286	CC(=O)N1CCC2(CNc3c2cccc3F)CC1	DDD01081640	-3.73667	14.0944
UCSD-0801326	COc1cc(cc(OC)c1OC)C1Nc2cc(Cl)ccc2C2=NCCN12	DDD01059891	-2.79333	16.0275
UCSD-0784995	O=C1N2CCN(C[C@@H]2CN1c1ccccc1)C1CCC1	DDD01025146	0.216667	10.7538
UCSD-0795939	Fc1ccc(cc1)-c1ncnc2CCN(CCc12)C(=O)C1CCOCC1	DDD01036772	-7.81	13.5962
UCSD-0784971	CC(=O)N1C[C@@H](F)[C@H](C1)OCc1nc2ccc(cc2[nH]1)C#N	DDD01025122	1.51333	7.80647
UCSD-0796571	Brc1c[nH]nc1C(=O)N1CCOCC1	DDD01037435	-10.0667	16.1661
UCSD-0823596	CCS(=O)(=O)NC[C@]12COC[C@H]1CN(Cc1cc(C)on1)C2	DDD01084976	-1.11	12.6392
UCSD-0792804	O=C(N1CCc2ncnc(N3CCOCC3)c2CC1)c1ccccn1	DDD01033309	0.19	5.81789
UCSD-0835440	CCC(=O)c1ccc(OCC(=O)NC(C)c2nnn[nH]2)cc1	DDD01254663	-15.0367	19.7106
UCSD-0839542	Cc1cncc(n1)C1CCCN(Cc2cccn2C)C1	DDD01270298	-0.1	8.3791
UCSD-0785441	C(NCc1ccc2OCOc2c1)[C@H]1Cn2ccnc2CO1	DDD01025592	-13.51	26.147
UCSD-0795070	COc1ccc(C(=O)NCC(N2CCCC2)c2cccn2C)c(OC)c1	DDD01035835	0.362333	6.21778
UCSD-0824178	CC(C)NC(=O)N1Cc2nc(NC3CCCCC3)sc2C(=O)C1	DDD01235897	-3.73333	16.5246
UCSD-0786201	CNC(=O)[C@H]1[C@H]2CN(Cc3cc(C)no3)CCN2C[C@@H]1c1ccccc1	DDD01026388	-15.27	24.9326
UCSD-0798910	CN(CC1(C)COC1)C(=O)c1cc(nc2ccccc12)-c1ccnn1C	DDD01057473	-1.69	8.37576
UCSD-0839543	CC(C)N1CCC(C1)c1cc(nc(C)n1)-c1cccc(c1)C(O)=O	DDD01270299	-10.0633	14.6208
UCSD-0786185	OC1CN(CC(=O)N(CCC#N)C1)C(=O)c1cccc(c1)C(F)(F)F	DDD01026372	-9.79867	23.1394
UCSD-0821690	CN(Cc1cccnc1)[C@@H]1CN([C@@H]2CCCO[C@H]12)C(=O)c1ccno1	DDD01083060	-8.29333	15.0935
UCSD-0821376	CC(C)COC1CC2(C1)CCN(CC2)C(=O)Cc1ccccn1	DDD01082744	-29.95	40.9873
UCSD-0826136	CCc1nc(CNc2nc3n(C)nc(C)c3s2)cs1	DDD01245331	-1.51667	7.32086
UCSD-0799389	O=C(N1CCCC(C1)c1nccs1)c1noc2CCCCc12	DDD01057952	-6.16667	10.9295
UCSD-0794098	CN(C)S(=O)(=O)N1C[C@@H]2CN(Cc3ccoc3)CCO[C@@H]2C1	DDD01034603	-7.53667	12.5182
UCSD-0798651	CC(C)(C)Nc1c(nc2ccccn12)C1CCN(CC1)C(=O)C(C)(C)C	DDD01057214	-8.08667	21.2536
UCSD-0822317	Cc1ccc(cn1)C(=O)N1CC[C@H]2[C@@H]1CCC(=O)N2c1ccccc1	DDD01083691	-10.7367	16.5207
UCSD-0801822	Oc1nc(nc2CCN(Cc3cccnc3)CCc12)N1CCCC1	DDD01060387	-1.39	7.05088
UCSD-0823715	CN(Cc1cn2CCN(Cc2n1)C(=O)CC1CC1)Cc1ccco1	DDD01085097	0.71	6.69807
UCSD-0797220	CC(C)(C)NC(=O)CCn1ncc2c(Cl)cccc12	DDD01038088	-23.3533	30.1865
UCSD-0821533	COCC1CC2(CN1C(C)C)CCN(CC2)c1ccc(C)nn1	DDD01082903	-14.6867	27.5462
UCSD-0795441	CNC(=O)[C@@H]1C[C@H]2CN(Cc3nccs3)C[C@H]2N1C	DDD01036274	-5.34	10.2529
UCSD-0792149	CNC(=O)[C@H]1C[C@@H]2CN(C[C@@H]2N1S(C)(=O)=O)C(=O)c1ccccn1	DDD01032653	-0.473333	8.29705
UCSD-0833451	O=c1cc(nc(CCc2ccccn2)[nH]1)C1CCNCC1	DDD01252664	-15.934	32.4605
UCSD-0786209	COC(=O)N1CCN2C[C@H](CO)[C@H]([C@H]2C1)c1ccccc1	DDD01026396	-16.7433	27.5423
UCSD-0845378	COc1cc(cc(Cl)c1OC)C(=O)NS(=O)(=O)c1cccc(c1)C#N	DDD01302565	-2.48333	12.564
UCSD-0817248	O=C(N1CCSCC1)c1c[nH]c2ccccc2c1=O	DDD01078168	-15.5567	20.3365
UCSD-0786178	COc1ccccc1C(=O)N1CC(O)CN(CC2CC2)C(=O)C1	DDD01026365	-14.9967	28.9535
UCSD-0786889	CC(C)n1ccc2ccc(cc12)C(=O)NC1CN2CCC1CC2	DDD01027393	-3.94333	10.055
UCSD-0799707	CC(C)n1nnc(CC(=O)NCC2(CCCC2)c2cccc(F)c2)n1	DDD01058271	-15.2267	29.8901
UCSD-0844448	O=C(CN1CCOC(Cn2cccn2)C1)Nc1ccncc1	DDD01301352	-10.3967	15.2001
UCSD-0800409	CN1CCC(CC1)c1cncc(n1)C(=O)NCc1ccc(F)cc1	DDD01058973	-9.76333	24.5096
UCSD-0839479	Clc1ccc(CN2CCCC3(C2)CNC(=O)c2ccccc2O3)s1	DDD01270235	-0.226667	5.7239
UCSD-0833036	CN(CC1CCCO1)c1nccc(n1)-c1ccc(C)nc1C	DDD01252246	-9.07	13.5846
UCSD-0795762	C([C@H]1[C@@H](CCN1Cc1cccnc1)N1CCOCC1)c1ccccc1	DDD01036595	2.88	4.66086
UCSD-0800210	COc1cccc(CCC2CCCCN2)c1	DDD01058774	-1.62	11.8703
UCSD-0792266	O=C(N1CCCC1)N1CCOCC2(CCN(Cc3cccs3)C2)C1	DDD01032770	-10.352	24.0728
UCSD-0788938	CC(C)N1[C@H]2CN(Cc3ccco3)C[C@H]2C[C@@H]1C(=O)NCC1CC1	DDD01029442	-2.79	8.3141
UCSD-0796092	CS(=O)(=O)N1CCOCC2(CCN(CC2)C(=O)c2cccnc2)C1	DDD01036925	-5.17667	10.5297
UCSD-0802564	Cc1cnc(N)c(c1)C(=O)C1CCN(CC1)C(=O)c1ccccc1F	DDD01061129	-0.183333	8.24279
UCSD-0832619	CCc1cc(CN(C)C(=O)c2cccc(OCC(C)=C)c2)on1	DDD01251828	-11.63	19.932
UCSD-0796356	Fc1cnc(nc1)N1CCCC2(CCC(=O)N2CC2CC2)CC1	DDD01037189	-5.29333	9.8184
UCSD-0802137	CNC(=O)c1cccc(c1)C1CNCCN1C(=O)c1ccn(C)n1	DDD01060702	-4.08	13.6228
UCSD-0823955	CCOCC1CC2(CO1)CCN(Cc1ccccn1)CC2	DDD01085339	-2.94	8.95203
UCSD-0823590	Cc1ncccc1NC(=O)[C@H]1C[C@@H]2CCN(Cc3nccs3)C[C@@H]2O1	DDD01084970	-2.818	10.6556
UCSD-0823591	Cc1nc(CN2CCc3ncnc(-c4ccc(F)cc4)c3CC2)cs1	DDD01084971	-0.0733333	5.41703
UCSD-0821692	C(O[C@@H]1CC[C@H]2[C@H]1OCCN2Cc1ccoc1)C1CCOCC1	DDD01083062	-14.52	28.9836
UCSD-0846377	Cc1cc(OCC(=O)N2CCCC(C2)c2noc(C)n2)no1	DDD01303854	-5.68	10.4786
UCSD-0791837	CC(C)N(C)Cc1cnc2CN(Cc3ccsc3)CCn12	DDD01032341	-9.10667	24.2615
UCSD-0802561	CC(=O)N1CCCC1c1nccc(C)n1	DDD01061126	2.46	4.67792
UCSD-0791936	O=C(N1C[C@@H](Oc2cccnc2)[C@H]2OCCC[C@@H]12)c1cscn1	DDD01032440	0.243333	9.56382
UCSD-0828232	CCCc1cncnc1N1CCC(CC1)NCCc1ccc(O)cc1	DDD01247432	4.93	0.76
UCSD-0836890	O=C(C1CN(C(=O)C1)c1ccccc1)N1CCC2(CC1)OCCO2	DDD01256120	-5.46333	19.3442
UCSD-0836478	CN(C)C(=O)C1CCCN1C(=O)c1ccc(Cn2ccnc2)o1	DDD01255704	-3.1	7.7664
UCSD-0784669	Cc1cc2nc(CO[C@H]3CN(CC4CC4)C[C@H]3F)[nH]c2cc1C	DDD01024820	2.11667	5.48279
UCSD-0823831	Cc1noc(C)c1CN1CC[C@H]2C[C@H](O[C@@H]2C1)c1nccs1	DDD01085214	-6.14367	16.2785
UCSD-0795314	CCOc1ccc(cc1)N(CC(=O)c1ccccc1)C1=NCCCCC1	DDD01036147	-0.279667	5.84115
UCSD-0800404	Cc1nccc(n1)N1CCCC1CCNS(C)(=O)=O	DDD01058968	-8.26667	15.4733
UCSD-0698584	CC(NC(=O)NCCCN1C=NC=N1)C1=C(Cl)C=CC=C1	DDD01303697	-3.22333	7.74064
UCSD-0824670	C[C@@H]1CN(Cc2nc(oc2C)-c2ccc(C)s2)[C@@H](C)CN1	DDD01243863	-13.6367	17.4683
UCSD-0823820	Cn1cc(cn1)C(=O)N1CC[C@@H]2[C@@H]1CCN2Cc1cccnc1	DDD01085203	-1.96333	6.95271
UCSD-0820645	COc1cc(ncn1)N1C[C@@H]2CN(Cc3ccccn3)C[C@@H]2C1	DDD01082001	-11.11	29.0032
UCSD-0787233	Cc1csc(NC(=O)CCc2c(C)nn(c2C)-c2nc(C)cc(=O)[nH]2)n1	DDD01027737	-11.76	20.3284
UCSD-0786075	COc1ccccc1C(=O)N1CC(O)CN(Cc2ccco2)C(=O)C1	DDD01026262	-4.12	16.0129
UCSD-0839461	CCC(=O)N1CCCC1c1nccnc1Nc1nc(C)cc(C)n1	DDD01270217	-2.50333	7.37548
UCSD-0808394	CN(C)CC1CN(CC(=O)N2CCc3ccccc23)CCO1	DDD01067800	-10.7667	15.0134
UCSD-0796261	O=C(N1CCOCC1)[C@@]12CCO[C@@H]1CCN(CCN1CCCCC1)C2	DDD01037094	-7.57333	12.8622
UCSD-0843767	Cn1ncc2C(CCCc12)NCc1cccc(c1)C(F)(F)F	DDD01300495	-6.92667	12.1225
UCSD-0845112	CC(C)c1nn(C)c(N(C)C)c1CNCCC(=O)N(C)C	DDD01302226	-0.52	8.21762
UCSD-0800114	Fc1ccc(F)c(CN2CCC(CC2)c2cnccn2)c1	DDD01058678	-4.54333	16.3456
UCSD-0802882	Clc1ccc(nn1)N1CCN(CC1=O)C(=O)N1CCOCC1	DDD01061457	-13.86	23.4501
UCSD-0823537	Fc1ccc(CC(=O)N2CCn3cc(Cn4cccn4)nc3C2)cc1	DDD01084916	-14.7433	18.7892
UCSD-0792962	O=C(NCc1cccnc1)C1=NOC2(CCN(C2)C(=O)N2CCCC2)C1	DDD01033467	-9.74667	14.6769
UCSD-0824245	CS(=O)(=O)NCc1cc(nc(n1)N1CCCC1)-c1cc(F)cc(F)c1	DDD01235964	-1.55	7.22351
UCSD-0823982	C(C1CC1)N1CCOCC2(CCN(C2)c2ncccn2)C1	DDD01085366	3.70333	2.11247
UCSD-0817683	CC(=O)N1CCCCCC1C1CCN(Cc2nc(no2)C2CC2)CC1	DDD01078649	-3.46267	10.7024
UCSD-0800218	CC(C)(C)OC(=O)N1CCN(CC1C(O)=O)c1ccc(F)cc1	DDD01058782	-10.8167	21.7465
UCSD-0789233	O=S1(=O)NCC2(CCN(CC2)c2ncccn2)COc2ccccc12	DDD01029737	-8.75	22.5106
UCSD-0789033	C[C@H]1CN(Cc2c(C)noc2C)C[C@@]11CCN(Cc2cccnc2)C1=O	DDD01029537	-13.23	16.237
UCSD-0845111	CCc1nc2CCC(Cn2n1)NCc1ncc(o1)-c1ccccc1	DDD01302225	-15.4157	30.8948
UCSD-0800499	COc1ccccc1-c1ccccc1CC1(CCNCC1)C(O)=O	DDD01059064	-9.75	17.391
UCSD-0839138	CCn1cc(N)c(n1)-c1nnc2CCCCn12	DDD01259391	-8.37667	12.2918
UCSD-0798770	CC(=O)N1CCOCC(Cc2ccc3n(ccc3c2)C(C)=O)C1	DDD01057333	-9.63	25.7824
UCSD-0827575	CS(=O)(=O)N1C[C@H]2CC[C@@H](C1)N(Cc1ccc3nsnc3c1)C2	DDD01246773	-7.89333	14.4856
UCSD-0799832	CC[C@@H](Cn1ncc2ccccc2c1=O)NC(=O)c1cnc(C)cn1	DDD01058396	-10.4567	21.7954
UCSD-0799994	COc1ccc(cc1)C1CNCCN1C(=O)c1cccc2cccnc12	DDD01058558	-1.45	6.17384
UCSD-0820280	CC(C)N1CC[C@H]2[C@H](C[C@@H](Cn3cncn3)N2c2nccs2)C1	DDD01081634	-18.2033	25.4661
UCSD-0823777	Clc1cccc(c1)C(=O)N1CC[C@H]2[C@H]1CCN2CC1CCOCC1	DDD01085159	-5.57667	12.1889
UCSD-0823711	CN(C)S(=O)(=O)N1CCC2(C1)CCCN(Cc1ccc(C)o1)C2	DDD01085093	-0.9	9.07238
UCSD-0823581	CC(C)OCc1ncn2CCCN(Cc3ccc(F)cc3)Cc12	DDD01084961	-2.25333	12.9452
UCSD-0804462	CC(NC1CCN(CC1)c1ccc(C)cn1)c1cccs1	DDD01063286	-2.98333	7.25908
UCSD-0802541	Cc1nccn1-c1nccnc1C1CCN(Cc2ccc(F)cc2)CC1	DDD01061106	-2.47	7.18187
UCSD-0812288	O=C(CC1CN(Cc2ccccc2)CCO1)NC1CCSCC1	DDD01072502	-15.0067	23.2806
UCSD-0838766	Cc1noc(C)c1CN1CC2(CC1=O)CCN(CC2)C(=O)c1cscn1	DDD01258004	-12.0267	15.0877
UCSD-0792963	CCc1cnc(nc1)N1CC[C@H]2[C@H]1CC(=O)N2c1cccnc1	DDD01033468	-10.9867	17.8647
UCSD-0790368	O=C(N1CCC2(CCC(=O)N2Cc2ccncc2)CC1)c1ccoc1	DDD01030872	-1.74963	8.03281
UCSD-0794110	Cc1csc(n1)[C@@H]1C[C@@H]2CCN(C[C@H]2O1)C(=O)c1cnc(C)cn1	DDD01034615	2.10667	3.56447
UCSD-0827272	Cc1cc(C)n(n1)C1CCN(C1)C(=O)c1cc(C)nc2cc(F)ccc12	DDD01246470	-9.74333	14.1369
UCSD-0801187	O=S(=O)(N1CCCC(C1)c1nccs1)c1ccccc1	DDD01059752	-8.91333	12.7103
UCSD-0794762	NCCc1c([nH][nH]c1=O)-c1ccccc1	DDD01035457	-22.1567	31.9115
UCSD-0792797	O=C1N(CCC11CCCN(Cc2cccnc2)C1)c1cccnc1	DDD01033302	2.06333	4.30619
UCSD-0795751	CS(=O)(=O)NCc1n[nH]c2CN(CCc12)C(=O)c1ccsc1	DDD01036584	-15.49	23.8099
UCSD-0821917	CC(C)CN1C(C)=N[C@@]2(CC[C@@H]3CN(CC4CC4)C[C@H]23)C1=O	DDD01083289	-17.1267	22.563
UCSD-0821378	CN(C)C1COC2(C1)CCN(CC2)S(=O)(=O)c1cccc(C)c1	DDD01082746	-11.6167	23.3668
UCSD-0798657	Cc1ncc2CCOC3(CCN(CC3)C(=O)C3CC3)c2n1	DDD01057220	-6.80567	17.1906
UCSD-0795354	O=C(Cc1cccs1)N1CC[C@@H]2[C@@H]1CC(=O)N2Cc1cccnc1	DDD01036187	2.42667	3.09015
UCSD-0802891	CS(=O)(=O)N1CC2(CCN(Cc3ccccn3)C2)Cc2ccccc12	DDD01061466	-15.2367	23.5497
UCSD-0839268	CCCn1ncc2c(cc(nc12)C1CC1)C(=O)Nc1cnn(CC)c1C	DDD01259522	-9.36333	15.5056
UCSD-0785902	CN(CCc1ccccc1)C(=O)C1OC(=NN1C(C)=O)c1ccncc1	DDD01026089	0.58	7.87221
UCSD-0822318	O=C([C@H]1CN(Cc2nccs2)C[C@H]2OCC[C@@H]12)N1CCCCO1	DDD01083692	-16.8333	37.9897
UCSD-0821377	CN(C[C@H]1OC[C@@H]2CCN(C[C@H]12)C(=O)C1CC1)Cc1cccnc1	DDD01082745	-13.4433	25.7218
UCSD-0837623	Cc1nnc(SCCNc2nc(C)nc3ncccc23)s1	DDD01256860	-31.5233	43.3001
UCSD-0724961	CCCC1=NOC(CN2CCC(CC2)C2=CC=NN2CCO)=N1	DDD01298847	-5.94333	10.3226
UCSD-0845907	CC(C)c1ncc2CCN(Cc3cccc(c3)C#N)Cc2n1	DDD01303245	-2.86667	7.1153
UCSD-0820941	COCCN1CCCn2c(C1)nc(CNS(C)(=O)=O)cc2=O	DDD01082300	-18.77	25.7112
UCSD-0789035	Cc1nc(CN2CCC3(CC2)NC(=O)CC3c2ccncc2)cs1	DDD01029539	-5.42	10.1647
UCSD-0787546	O=C(Nc1nc2CCN(Cc2s1)S(=O)(=O)C1CC1)C1CC1	DDD01028050	0.54	5.58291
UCSD-0824008	OCC(=O)N1CCc2onc(Cn3cccn3)c2C1	DDD01085392	-10.73	19.0665
UCSD-0802793	O=C1Nc2ccccc2CNC11CCN(CC2CC2)CC1	DDD01061368	-14.9573	31.0297
UCSD-0804008	COCCCN(Cc1ccncc1)c1ncc(cc1Cl)C#N	DDD01062772	-6.54	10.5929
UCSD-0824065	OCCNc1cc(ncn1)-c1ccncc1	DDD01235784	-13.3533	16.5124
UCSD-0825355	CC(C)[C@@H]1CN(C[C@H]1NC(C)=O)S(=O)(=O)Cc1ccccc1	DDD01244550	-15.72	18.5578
UCSD-0822311	CC(C)C(=O)N1CCOC2(C1)COCCN(C2)c1ncccn1	DDD01083685	-22.62	28.1838
UCSD-0796343	C(N1CCn2cc(Cn3cccn3)nc2C1)c1nccs1	DDD01037176	-2.10033	8.92058
UCSD-0802560	CC(C)N1CCC(Cc2cncc(n2)-c2ccccc2C(O)=O)CC1	DDD01061125	-5.22333	16.7047
UCSD-0798511	CC(=O)N[C@H]1CCO[C@H](C1)c1cccc(NC(C)=O)c1	DDD01057074	-10.1007	22.6956
UCSD-0822883	O=C(Nc1ccccc1)N1CC(C(=O)N2CCCC2)C2(C1)CCOCC2	DDD01084260	-23.44	32.1278
UCSD-0798779	C1CN(CCC1c1ccncc1)c1cccnc1	DDD01057342	-16.6233	27.2909
UCSD-0820719	O=c1ccc2CCN(CCc2n1CCN1CCCC1)c1ncccn1	DDD01082075	-8.23667	12.9854
UCSD-0788492	O=C(NCC1CCCCC1)N1C[C@@H]2C[C@@H]1CN2	DDD01028996	-7.55	11.2333
UCSD-0785922	Nc1c(ncnc1N1CCOCC1)N1CCCC1	DDD01026109	-4.36	10.5957
UCSD-0826538	CN(CCN1CCCC1)c1nccc(n1)N1CCN[C@H]2CS(=O)(=O)C[C@@H]12	DDD01245733	-14.69	16.9961
UCSD-0796086	Cc1ncnc2CCN(Cc3ccc4OCOc4c3)CCc12	DDD01036919	-4.04333	7.92814
UCSD-0799620	CN(C)S(=O)(=O)N1CCC(CC1)c1cc2nc(C)cc(n2n1)C(F)(F)F	DDD01058184	-25.09	40.5336
UCSD-0785115	CC(C)NC(=O)[C@@H]1Cc2[nH]cnc2CN1CCCc1ccccc1	DDD01025266	1.79333	4.10281
UCSD-0784686	CN1CC[C@@H](C1)c1nnc(Cc2c[nH]c3ccccc23)o1	DDD01024837	-4.43667	11.2955
UCSD-0831124	CC(C)Oc1cccc2n(CC(F)(F)F)nc(NC(=O)CN(C)C)c12	DDD01250329	-14.6667	22.6574
UCSD-0839520	Cc1cncc(n1)C1CCCN(C1)C(=O)c1cccn1C	DDD01270276	-1.16	5.5686
UCSD-0791849	CCS(=O)(=O)N1CCO[C@H]2[C@@H](CC[C@H]12)Oc1ncccc1F	DDD01032353	-2.49733	8.30318
UCSD-0823593	CN1CC(=O)N(CC11CCN(C1)S(C)(=O)=O)c1cccc(F)c1	DDD01084973	0.256667	7.61237
UCSD-0790863	COCC1N(CCc2cnn(C)c12)C(=O)c1ccc2OCOc2c1	DDD01031367	-2.09833	7.65237
UCSD-0792223	O=C(N1CCOCC2(CN(C(=O)CO2)c2ccccc2)C1)c1c[nH]cn1	DDD01032727	-8.71667	12.3795
UCSD-0798213	FC(F)(F)c1cc(C2CCCN(C2)c2cnccn2)n2ccnc2n1	DDD01056776	-7.14333	13.5197
UCSD-0785801	CNC(=O)c1cc(C)n(n1)-c1ccccc1	DDD01025988	-17.2567	23.6448
UCSD-0600885	CC1=CN(N=C1)C1CCCN(C1)C(=O)C1=C(C=CS1)N1C=NN=N1	DDD01302685	1.06667	3.95894
UCSD-0844019	COc1cc(CNC(=O)Nc2nnc(s2)C(C)C)ccn1	DDD01300800	-7.22667	10.4854
UCSD-0799299	Cc1csc2c(nc(C)n12)C1CCN(CC1)C(=O)Cn1cncn1	DDD01057862	-10.26	23.3835
UCSD-0800303	Cc1nn(C)cc1CN(Cc1ccccn1)Cc1ccccc1Cl	DDD01058867	-8.43333	22.6611
UCSD-0786092	CCOC(=O)CN1c2ccccc2C(CCN(CC1=O)S(C)(=O)=O)OC	DDD01026279	-17.13	37.5599
UCSD-0833849	CN(Cc1ccon1)c1nccc(n1)-c1cn(C)nc1C	DDD01253064	-12.79	15.8119
UCSD-0829855	CCOc1ccccc1CN(CC)Cc1ccc(cc1)S(=O)(=O)NC	DDD01249057	1.87	3.4999
UCSD-0800800	Cc1ccc(CN(CCCN2CCOCC2)Cc2cncn2C)o1	DDD01059365	-5.25933	13.7146
UCSD-0785955	NC1(CNC(=O)c2cc3ccccc3[nH]2)CCCCC1	DDD01026142	3.45667	2.00854
UCSD-0821456	Cc1cnc(nc1)N1CCCC2(C1)COCCN(C2)c1nccs1	DDD01082824	-5.02667	9.41151
UCSD-0800887	Cc1nc(sc1CCOc1ccccc1F)C1(O)CCCNCC1	DDD01059452	-4.00667	7.77149
UCSD-0839136	Cc1n(C)nc2nc(SCC(O)=O)cc(C(F)F)c12	DDD01259389	2.51403	2.35534
UCSD-0824048	Cc1ccc(nn1)N1CCC2(CCN(CC2)C(N)=O)CC1	DDD01085432	0.523333	4.2363
UCSD-0786202	CNC(=O)[C@H]1[C@H]2CN(Cc3cccs3)CCN2C[C@@H]1c1ccccc1	DDD01026389	-11.07	24.8324
UCSD-0796368	Cn1cccc1CN1CCC2(C1)CCCN(C2)C(=O)Cc1cccnc1	DDD01037201	-6.71667	10.5267
UCSD-0802903	CS(=O)(=O)N1CC2(CCN(CC3CC3)C2)Cc2ccccc12	DDD01061478	-18.97	34.5243
UCSD-0769449	CCOC(=O)CSC1=NN=C(O1)[C@@H](N)C(C)CC	DDD01026651	-7.32333	15.2403
UCSD-0830490	Cn1cc(CNCC2(O)CCCN(Cc3ccc(F)c(F)c3)C2=O)cn1	DDD01249693	-1.91333	11.1602
UCSD-0813035	COc1cc(F)ccc1N1CCN(Cc2nc(C)c(C)o2)CC1	DDD01073348	-18.9833	20.4026
UCSD-0803037	Cc1ccc(NCC2(O)CCNCC2)cc1C	DDD01061619	-7.33	12.1277
UCSD-0717199	CC(CN1CCOCC1)NC(=O)NC1=C(N=CC=C1)N1C=CC=N1	DDD01062701	-4.51733	12.055
UCSD-0823534	CC(C)NC(=O)N1CCc2nc(sc2CC1)C(=O)NCc1ccccc1	DDD01084913	3.193	1.95522
UCSD-0811923	CCn1cnnc1C1CCN(CC1)C(=O)c1ccc(OC(C)C)nc1	DDD01072027	-7.42667	10.3505
UCSD-0798771	Nc1nccc(n1)C1CN(Cc2ccc(o2)-c2ccccc2C(O)=O)C1	DDD01057334	-6.55333	16.7293
UCSD-0796335	Cn1ncc2CN(Cc3nccs3)CC(COCC3CC3)c12	DDD01037168	-6.01333	9.23247
UCSD-0804849	CC(NCCn1cccn1)c1ccc(F)cc1F	DDD01063717	-5.53667	11.9776
UCSD-0821161	COCCN1CCO[C@@H]2CN(CC[C@@H]2C1)C(=O)c1ccc2[nH]ccc2c1	DDD01082525	-17.0533	27.4772
UCSD-0799602	Cn1cc(CN2CCCC(C2)n2c3ccccc3oc2=O)cn1	DDD01058166	-1.27333	8.38865
UCSD-0798902	CNc1cccc(CC2COCCN(C2)C(=O)c2cncs2)n1	DDD01057465	-1.74667	5.79907
UCSD-0798722	CNC(=O)C1(Cc2cc(no2)C(C)C)CCN(Cc2cccnc2)C1	DDD01057285	-10.8967	17.2112
UCSD-0823898	CC(=O)N1CCC2(C1)CCCN(Cc1ccc(Cl)c(c1)C(F)(F)F)C2	DDD01085282	-8.43333	12.4063
UCSD-0799834	Cc1ncc(CN2CCc3c(C2)nc2cc(nn2c3O)C2CC2)n1C	DDD01058398	-8.41667	11.8906
UCSD-0829510	CC(C)Cn1cncc1-c1nc2c(CCCNC2=O)[nH]1	DDD01248712	-5.49333	9.06585
UCSD-0786176	COc1ccc(cc1OC)C(=O)N1CC(O)CN(C2CCC2)C(=O)C1	DDD01026363	-24.8567	28.7792
UCSD-0785969	COc1ccc2[nH]c(cc2c1)C(=O)NCC1(N)CCCC1	DDD01026156	-8.71667	16.4019
UCSD-0825336	C[C@@H]1CN(CCOc2ccc(F)cc2)CC[C@@]1(O)C1CCOCC1	DDD01244530	-20.2633	21.4203
UCSD-0785019	CS(=O)(=O)N1CCN2[C@@H](CN(C3CCCCC3)C2=O)C1	DDD01025170	-4.10167	10.5439
UCSD-0800419	CC(C)(C)n1nnnc1CN(Cc1ccccc1)Cc1ccccc1Cl	DDD01058983	-9.71733	21.5301
UCSD-0846309	COCCN1CCN(Cc2cccc(c2)C(=O)N(C)C)CC1C	DDD01303769	-6.04333	9.09124
UCSD-0823819	CN(C)c1ncnc2CCN(CC3CCCC3)CCc12	DDD01085202	-0.14	6.60384
UCSD-0800695	CNC(=O)c1cn[nH]c1C1CCN(Cc2cccc(C)c2OC)C1	DDD01059260	-5.47	16.0574
UCSD-0791070	Cc1oncc1C(=O)N1CC[C@H]2CO[C@H](CN3CCCC3)[C@H]2C1	DDD01031574	-4.49	8.07531
UCSD-0813889	Cc1cc(C)n(CCC(=O)OCC(=O)N2CCc3sccc3C2)n1	DDD01074331	-12.3533	14.7648
UCSD-0785868	CN(CCc1ccccc1)C(=O)C1OC(=NN1C(C)=O)c1ccccc1	DDD01026055	-19.42	27.8719
UCSD-0799823	CCn1ncc(C(=O)NCCc2nc(n[nH]2)-c2cccnc2)c1C	DDD01058387	-14.65	26.5579
UCSD-0827631	CSCC[C@H](N)C(=O)NCc1cc2CN(CCCn2n1)C(=O)N(C)C	DDD01246829	-9.02667	12.0768
UCSD-0845545	CN(C)c1cc(ccn1)C(=O)N1CCN(CC1)S(C)(=O)=O	DDD01302771	-4.10167	10.8842
UCSD-0789278	OCCN1CCC2(CC(NC(=O)c3ccsc3)c3ccccc23)CC1	DDD01029782	2.89867	2.18022
UCSD-0836446	Cc1ccc(OCCCSC2=NCCN2)cc1	DDD01255672	-16.7033	24.8906
UCSD-0820287	O=C(Cc1ccccc1)N1CCC2(CC(CO2)Nc2cnccn2)CC1	DDD01081641	-20.58	32.5191
UCSD-0800305	Cc1nc(C)c(s1)C(=O)N1CCCC1(C)C(=O)NC1CCCC1	DDD01058869	-14.3567	25.2418
UCSD-0835653	Cc1[nH]ccc1C(=O)N[C@H]1CN(C[C@@H]1C1CC1)S(C)(=O)=O	DDD01254877	-8.84667	12.8018
UCSD-0845238	Cc1cc(C)n(CC2CCCN2C(=O)c2cnn(C)c2C2CC2)n1	DDD01302396	-7.141	15.4948
UCSD-0834638	NC(=O)c1ccc(nc1)N1CCN(Cc2c(Cl)cncc2Cl)CC1	DDD01253855	-13.5267	23.2791
UCSD-0798642	CCCC(=O)N(C)Cc1nc(ncc1-c1ccncc1)N1CCCC1	DDD01057205	-16.9867	34.5861
UCSD-0588490	OC(COC1=CC=CC=C1)CN1CCC2=C(C1)N=CN2C1CC1	DDD01303800	-18.42	20.2436
UCSD-0800410	COc1cc2cc(C)c(SCCN3CCCCC3)nc2cc1OC	DDD01058974	-3.70967	9.6491
UCSD-0823944	Cn1cc(CN2C[C@@H]3COC[C@]3(CNC(=O)c3ccsc3)C2)cn1	DDD01085328	-3.32	6.43407
UCSD-0819719	CC(N1CCN(CC1)c1ccc(cn1)C#N)c1nc(no1)C1CC1	DDD01081005	-10.04	12.36
UCSD-0787508	Cc1csc(c1)C(=O)NCCN1CCC(CC1)c1cccs1	DDD01028012	-0.61	4.06277
UCSD-0795383	CC(C)CN1CCC2(CCN(Cc3ccoc3)CC2)C1=O	DDD01036216	-7.60667	18.2184
UCSD-0799610	CN(C)C(=O)CN1CCC2(CC1)CN(Cc1ccccc1O2)S(C)(=O)=O	DDD01058174	-6.32667	12.4253
UCSD-0801510	Cc1nc(ncc1C(N)=O)C1CCCN1C(=O)CC1CCCC1	DDD01060075	-1.978	7.8052
UCSD-0800577	Cc1cc(C)nc(n1)C1CCN(C1)c1ccncn1	DDD01059142	-14.4167	21.4139
UCSD-0836813	Cc1nc(co1)C(=O)Nc1cc(C)ccc1C	DDD01256041	-12.36	16.36
UCSD-0794972	CNC(=O)c1cc(cs1)S(=O)(=O)C(C)C	DDD01035736	-18.4933	22.2643
UCSD-0821770	CNC(=O)[C@@H]1CCO[C@@H]2CCN(Cc3ccsc3)C[C@@H]12	DDD01083141	-10.7	16.5374
UCSD-0785310	CCNC(=O)N1CC[C@H]2CC(=O)N(CCN3CCNC3=O)CC[C@H]2C1	DDD01025461	-14.7	16.3643
UCSD-0837192	COCCN(C)C[C@@H]1CN(C[C@@H]1CO)c1cc(C)nc2ccccc12	DDD01256427	-9.66333	14.1157
UCSD-0825189	Cc1cc(Cl)ccc1C(=O)N[C@H]1CN(C[C@@H]1C1CC1)S(C)(=O)=O	DDD01244383	-1.36667	8.44354
UCSD-0844760	Cc1ccc(NC2CCN(CC2)C(=O)c2cccn2C)nn1	DDD01301760	-11.4067	16.0241
UCSD-0789996	Cn1c2CCC(Cc2ccc1=O)NC(=O)Cc1ccsc1	DDD01030500	0.583333	4.17663
UCSD-0817756	CC(NCCCc1cnn(C)c1)c1ccc(Br)s1	DDD01078732	-13.9233	21.1063
UCSD-0805301	CCc1noc(CNc2cc3OCCOc3cc2Cl)n1	DDD01064237	-10.4333	18.8723
UCSD-0831997	COc1cccc(CC2(CCN(CC2)c2ccc(Cl)cn2)C(O)=O)c1	DDD01251205	-4.27667	7.13747
UCSD-0834117	O=S1(=O)C[C@@H]2[C@H](C1)N(Cc1ncc[nH]1)CCN2CCCc1ccccc1	DDD01253332	-16.9833	22.6931
UCSD-0800698	Nc1nccc(n1)C1CCCCN1Cc1cccc(F)c1	DDD01059263	-2.55233	8.29925
UCSD-0801828	NC(=O)C1(CCCN1Cc1ccc(Cl)c(F)c1)c1cnccn1	DDD01060393	-5.36333	10.2184
UCSD-0800208	CC(C)N1CCCC(C1)c1nc(C)c(Br)s1	DDD01058772	-5.87667	16.1359
UCSD-0803025	OC1(CNc2ccccc2)CCNCC1	DDD01061607	-14.8567	16.9212
UCSD-0786396	CC(=O)NCCC(Cc1ccccc1)c1ccco1	DDD01026636	-11.4633	15.1121
UCSD-0794101	COc1ccc(CN2CC(COCC3CC3)c3c(C2)cnn3C)cc1	DDD01034606	-11.4667	14.9674
UCSD-0800412	O=C(N1CCC(CC1)c1cnccn1)c1cc2CCCc2s1	DDD01058976	-10.13	16.8977
UCSD-0839027	CN(C)S(=O)(=O)N1CCN(CC1)c1ccnc(n1)N1CCCC1	DDD01258265	-3.27433	9.30765
UCSD-0785953	NC1(CNC(=O)c2cc3ccccc3[nH]2)CCCC1	DDD01026140	-5.68333	14.1162
UCSD-0800579	COc1ccc2[nH]cc(C(=O)N3C[C@@H](O)[C@@H](C3)N3CCCC3)c2c1	DDD01059144	-15.98	27.5989
UCSD-0786857	CC(C)c1sc(Cl)nc1C(=O)N1CCN(Cc2ccccc2)CC1	DDD01027361	-26.8567	36.7616
UCSD-0804163	Clc1cc(Cl)cc(CN2CCC(CC2)NCc2cc[nH]n2)c1	DDD01062946	-20.16	36.6101
UCSD-0696011	CC(NC(=O)N(C)CCCOC1=CC=C(F)C=C1)C1=NN=CN1C	DDD01303785	-8.36333	10.8012
UCSD-0810577	CCOC(C)c1nc(CN2CCN(CC2)c2ncc(C)cn2)cs1	DDD01070407	-20.1033	23.9956
UCSD-0829476	CC(=O)Cc1c(C)nn(c1C)-c1cncc(c1)C(N)=O	DDD01248678	-5.93	13.8593
UCSD-0806560	COc1cc2CC(C)Oc2c(CNCCn2cccn2)c1	DDD01065678	-16.2067	30.243
UCSD-0823832	CS(=O)(=O)N[C@@H]1CN([C@@H]2CCCO[C@H]12)C(=O)c1ccccn1	DDD01085215	-5.86667	9.88513
UCSD-0820650	O=C(N1CCO[C@@H]2CNC[C@H]12)c1ccco1	DDD01082006	-27.3933	47.6905
UCSD-0841461	COC(=O)NCC(=O)NCc1nn(c2CCCc12)-c1ccccc1	DDD01297546	-4.37	9.27322
UCSD-0619893	CC1=CC(CN(CCO)CC2=C(F)C=CC(Br)=C2)=NO1	DDD01062710	-2.08333	8.70662
UCSD-0819403	Cc1ccn(n1)-c1ccccc1NCc1ccccn1	DDD01080626	-9.48	11.7071
UCSD-0803009	CCOC(=O)[C@H]1CNC[C@@H]1C(F)(F)F	DDD01061591	-0.77	5.76042
UCSD-0799220	CNC(=O)C1CN(CCN1Cc1ccccc1)c1ccnc(C)n1	DDD01057783	-5.84667	15.2177
UCSD-0786193	COC1CCN(CC(=O)N(C)c2ccccc12)C(=O)NCC(N)=O	DDD01026380	-10.59	18.4938
UCSD-0814617	Fc1ccccc1-n1cc(cn1)S(=O)(=O)NC(=O)c1ccco1	DDD01075156	-17.99	26.599
UCSD-0791935	O=C(Cc1ccccn1)N1C[C@@H](Oc2cccnc2)[C@H]2OCCC[C@@H]12	DDD01032439	-3.24	11.4856
UCSD-0792720	CO[C@H]1CN(Cc2ccccc2F)[C@@H]2CCCO[C@H]12	DDD01033225	-16.6267	24.8031
UCSD-0805979	CN(CCOCC1CC1)C(=O)Nc1ccc([S+](C)[O-])c(F)c1	DDD01065003	-13.8167	25.754
UCSD-0800585	COc1ccc(cc1)-c1cc(ccn1)C1CCNCC1	DDD01059150	-6.70333	17.4918
UCSD-0822882	COCCN1CCC11CCN(C1)C(=O)c1ccc2[nH]ccc2c1	DDD01084259	-19.98	25.459
UCSD-0824115	CNc1ncc(cn1)-c1ccnn1C1CCN(CC1)C(C)=O	DDD01235834	-11.5467	13.3011
UCSD-0831919	CCCS(=O)(=O)N[C@H]1CN(C[C@@H]1C(C)C)c1ncccc1C(N)=O	DDD01251127	-25.6067	41.5628
UCSD-0799905	CC(C)C(NC(=O)c1cnc(nc1)N1CCOCC1)c1cccs1	DDD01058469	-12.3967	18.6382
UCSD-0796325	Fc1ccc(NC(=O)N2C[C@@H]3C[C@@H]([C@H](C2)O3)C(=O)N2CCOCC2)cc1	DDD01037158	2.20333	1.18568
UCSD-0829068	CC(C)Cc1cn(CC2CCCN(C2)C(=O)c2cnc(C)cn2)nn1	DDD01248270	-10.4633	12.1014
UCSD-0798731	OC(=O)CCCN1C[C@@H](c2ccccc2F)[C@]2(C1)CCCCC(=O)N2	DDD01057294	-11.54	24.7454
UCSD-0795355	CC(=O)N1CCC2(CC1)C(=O)N(CC1CC1)c1ccccc21	DDD01036188	-28.0867	54.4847
UCSD-0788961	CCN1CCOCC2(CCCN(C2)C(=O)c2conc2C)C1	DDD01029465	-8.29333	11.8455
UCSD-0786436	COC(=O)CNC(=O)Cn1ccc2ccc(F)cc12	DDD01026717	-13.1133	15.6747
UCSD-0795936	O=C(N1CCO[C@H]2[C@H](CC[C@H]12)OCc1cccnc1)c1ccncn1	DDD01036769	-20.75	22.5232
UCSD-0801500	CCc1cc(c2c(noc2n1)C1CCN(CC1)C(=O)COC)C(F)(F)F	DDD01060065	-8.37	12.7494
UCSD-0800786	CCC(CN1CCOCC1)NC(=O)Cc1c(C)[nH]c2cc(C)cc(C)c12	DDD01059351	0.289333	2.72823
UCSD-0839197	CCOCn1cc(NC(=O)C2CCN(CC2)S(C)(=O)=O)cn1	DDD01259450	-16.6967	17.6287
UCSD-0794030	O=C(NCC1CC1)C1CN(CC11CCOCC1)C(=O)c1ccco1	DDD01034535	-6.66333	12.8244
UCSD-0799612	CC(C)c1ncc(CN2CCC(O)(CC2)c2ccccc2F)cn1	DDD01058176	-14.8033	31.0886
UCSD-0798203	CC(C)c1cc(no1)C(=O)N1CCCC(C1)c1cc(=O)nc2CCCn12	DDD01056766	-11.5733	17.7632
UCSD-0846334	CN(C1CCN(CC1)c1ccccn1)C(=O)Cc1c[nH]c2ccccc12	DDD01303798	-6.79	9.40155
UCSD-0785292	O=C(NC[C@H]1C[C@@H]2CCN1C[C@@H]2CN1CCOCC1)Nc1ccsc1	DDD01025443	-7.58667	17.1903
UCSD-0821532	Fc1cnc(nc1)N1C[C@@H]2C[C@@H]([C@H](C1)O2)C(=O)N1CCCC1	DDD01082902	-5.88	9.23002
UCSD-0824011	O=C(C1CC=CC1)N1CCC2(CC1)CN(Cc1ccccn1)CCO2	DDD01085395	-1.89333	4.56121
UCSD-0839527	CCn1cc(cn1)C(=O)N1CCCC(C1)c1[nH]ncc1S(C)(=O)=O	DDD01270283	-5.73	9.60072
UCSD-0823828	O=C(N1CC[C@@H]2O[C@@H](COCCN3CCCC3)CC[C@H]12)c1ccno1	DDD01085211	-1.52367	5.89158
UCSD-0802565	CC(=C)C(=O)N1CCC(CC1)C(=O)c1cc(C)cnc1N	DDD01061130	-3.56	6.69504
UCSD-0845547	O=C(N1CCN(CC1)c1cnccn1)c1ccc2OCOc2c1	DDD01302773	-7.25333	10.1079
UCSD-0789744	O=C(N1C[C@H](OCC2CC2)[C@H]2COC[C@@H]12)c1ccc2OCOc2c1	DDD01030248	-14.6133	15.6274
UCSD-0799897	Cc1ccn(CCNC(=O)C2(C)CC(=NO2)c2ccccc2)n1	DDD01058461	-10.9633	21.0107
UCSD-0838345	Cc1ccccc1Oc1ncccc1CNS(C)(=O)=O	DDD01257583	2.81667	0.442418
UCSD-0795228	CC[C@H](C)[C@H](NC(=O)Cc1csc(n1)-c1cccc(Cl)c1)C(O)=O	DDD01036026	-6.85667	8.84679
UCSD-0785495	CCCN(CCC)CCNC1=C(C(=O)C1=O)c1ccccc1	DDD01025648	-18.06	25.6912
UCSD-0800401	CN(C)c1cccc(n1)C1CCN(CC1)C1COCC1O	DDD01058965	-13.2133	21.6122
UCSD-0824580	O=C(N[C@H]1CN2CCC1CC2)c1cc(Cn2cnc3ccccc23)[nH]n1	DDD01243773	-8.99	15.6175
UCSD-0838867	CN(CCc1noc(C)n1)C(=O)C1COc2ccccc2C1	DDD01258105	-2.79	5.2233
UCSD-0796129	C(Oc1cccnc1)C1CN(Cc2ccco2)Cc2nccn2C1	DDD01036962	-5.80067	12.752
UCSD-0821006	CNC(=O)NCC1CCC2(CCN(CC2)C(=O)c2cccnc2)CO1	DDD01082367	-9.59667	18.1682
UCSD-0789043	CCN1CC2(CC1=O)CCCCN2C(=O)c1ccsc1	DDD01029547	-8.78667	10.6886
UCSD-0794750	Cn1c2ncnn2c2NC(=O)CC(c3cccc(F)c3)c2c1=O	DDD01035435	-17.82	24.8012
UCSD-0758229	CN(C)CCCNC(=O)C1=CC=CC=C1NC(=O)C1=C(Cl)C=CC=C1	DDD01035169	-4.05667	8.0149
UCSD-0821524	O=C(CC1CC2(CCNCC2)c2ccccc12)NCC1CC1	DDD01082894	-14.9967	19.8371
UCSD-0845819	NC(=O)CC1CCN(CC1)C(=O)CCOc1ccc(Cl)cc1	DDD01303121	-10.2633	14.8812
UCSD-0799397	CC(=O)Nc1ccc(CCC2(CCCCC2)NC(=O)C2CCCO2)cn1	DDD01057960	-13.318	25.9201
UCSD-0800121	Nc1nccnc1CC1CCCN(Cc2c[nH]c3ccccc23)C1	DDD01058685	-13.7567	22.0362
UCSD-0821160	COCC1CN(Cc2nnn(CC3CC3)c12)C(=O)CC1=CCCCC1	DDD01082524	-17.76	32.1592
UCSD-0796477	O=C(NCCCN1CCOCC1)c1cccc(OCc2ccccc2)c1	DDD01037341	-6.59333	8.3739
UCSD-0802129	CCC(C)S(=O)(=O)N1CCc2nc(ncc2C1)C1CCNCC1	DDD01060694	-5.3	11.0973
UCSD-0786068	CCOC(=O)N1[C@H]([C@H](C[C@]11CCCCNC1=O)C(O)=O)c1ccco1	DDD01026255	-25.42	41.8672
UCSD-0786110	OC12CCC(CC1)N(C2CN1CCOCC1)C(=O)Nc1ccccc1	DDD01026297	-12.27	24.897
UCSD-0846443	CNc1snc(C)c1C(=O)N1CCCC(C1)n1ccnc1C(C)C	DDD01303936	-6.81	9.01922
UCSD-0833099	COc1cc2CCN(Cc3ncccc3C(O)=O)Cc2cc1OC	DDD01252309	-8.87667	10.3835
UCSD-0785791	NCCc1cn(Cc2ccccn2)c2ccccc12	DDD01025978	-2.78	8.78975
UCSD-0786878	COc1cn(CC(=O)N2CCN(CC2)c2ccc(F)cc2)c(C)cc1=O	DDD01027382	-20.09	33.4041
UCSD-0795379	CO[C@@H]1CCN(C[C@@H]1Cc1ccc(OC)cc1)C(=O)CN(C)C	DDD01036212	-10.95	16.5105
UCSD-0789023	CCC(=O)N1CC[C@H](O)[C@@H]1Cc1ccccc1	DDD01029527	-5.71333	7.62736
UCSD-0784626	Cc1ccccc1CN1CC[C@@H](C1)c1nnc(o1)-c1cncn1C	DDD01024777	-14.5033	21.5519
UCSD-0839540	C[C@]1(O)CCN(Cc2cncs2)C[C@@H]1Oc1cccc(F)c1	DDD01270296	-2.49333	5.37522
UCSD-0846876	CCc1nccn1C1CCCN(C1)C(=O)c1csc(COC)n1	DDD01304493	-6.4	14.5777
UCSD-0784681	CC(=O)N1CCC(CC1)N1CC[C@@H](C1)c1nc2cc(C)ccc2o1	DDD01024832	-12.1733	17.4503
UCSD-0788165	OC(=O)c1cc(ccc1F)S(=O)(=O)Nc1cnn(c1)C1CCOCC1	DDD01028669	-8.32667	12.1826
UCSD-0788956	CC(C)NC(=O)CC1COC2(C1)CCN(Cc1ccco1)CC2	DDD01029460	-4.41667	8.00661
UCSD-0791923	CCN1CCn2c(C)cnc2C11CCN(CC1)C(=O)c1cscn1	DDD01032427	-6.44333	13.962
UCSD-0792803	COCc1nnc2CN(Cc3ccoc3)CCn12	DDD01033308	-7.08667	8.66063
UCSD-0786167	Cc1ccc(CN2CC(O)CN(CC2=O)C(=O)C2CC2)cc1	DDD01026354	-22.0549	40.7654
UCSD-0823990	CS(=O)(=O)N1CCC(C1)c1nnc2ccc(cn12)C(=O)N1CCCC1	DDD01085374	-1.04967	4.954
UCSD-0839538	COCCc1ncc(CN2CCC(CC2)Oc2ccccc2C)cn1	DDD01270294	-1.35433	5.52527
UCSD-0833775	CCN(CC)Cc1cc(C(=O)N2CCC3(CC2)NCCNC3=O)c(C)o1	DDD01252990	-20.0333	21.8308
UCSD-0785140	CN1C[C@H](C[C@H]1c1nc(no1)-c1cnccn1)NC(=O)C1CC1	DDD01025291	-13.8	14.6092
UCSD-0822188	C(N1C[C@@H]2OCCN([C@@H]2C1)c1cccnc1)c1ccccn1	DDD01083562	-7.77333	9.15053
UCSD-0798656	CC(C)C(=O)N1CCC2(CC1)OCCc1cnc(C)nc21	DDD01057219	-2.16	4.39348
UCSD-0786444	COCCNC(=O)Cn1ccc2ccc(F)cc12	DDD01026735	-6.32333	9.34899
UCSD-0788163	CC(=O)c1ccc(cc1)S(=O)(=O)Nc1cnn(c1)C1CCOCC1	DDD01028667	-17.7467	18.3965
UCSD-0797082	CCc1noc(n1)C1CCCCN1C(=O)c1cc(C)on1	DDD01037950	-12.55	14.234
UCSD-0784815	CC(C)NC(=O)O[C@H]1COCCN(C1)c1nc2ccccc2s1	DDD01024966	-4.35	6.16178
UCSD-0606338	OC1=C(C=CC=N1)C(=O)NCCCN1CCC2=C(C1)C=CC=C2	DDD01303872	-5.26	12.9493
UCSD-0846398	Cc1cnn(CC2CN(CC(=O)N3CCc4ccccc34)CCO2)c1	DDD01303888	-1.9835	5.91668
UCSD-0827622	O=S1(=O)C[C@H]2[C@@H](C1)N(Cc1ccncc1)CCN2Cc1ccoc1	DDD01246820	-22.13	28.2105
UCSD-0788413	O=C(N[C@]12CC1CN(C2)C(=O)c1ccco1)c1ccoc1	DDD01028917	-11.87	12.6261
UCSD-0839536	O=C(N1CCCC(Cc2nccs2)C1)c1cnco1	DDD01270292	-7.97	14.3589
UCSD-0800282	Cc1noc(C)c1CCC(=O)N1CCOCC1CCc1cnccn1	DDD01058846	-10.299	19.9728
UCSD-0829819	CCCN1CCC(CC(=O)NCc2cc(O)ncn2)CC1	DDD01249021	-13.11	17.5358
UCSD-0793733	Cc1ncsc1CN1C[C@@H]2COC[C@]2(CNC(=O)c2ccccc2)C1	DDD01034238	-4.66	8.05404
UCSD-0846316	CN(C1CCCC1)C(=O)Cc1ccccc1C	DDD01303776	-3.87333	5.66283
UCSD-0823833	Cc1ncoc1C(=O)N1C[C@H]2CCC[C@@]2(COCC2CCOCC2)C1	DDD01085216	-0.243333	3.96117
UCSD-0846397	COCC(C)NC(=O)c1cc(Br)c2OCCOc2c1	DDD01303886	-4.86667	6.63839
UCSD-0820575	O=c1ccc2CC(CCc2[nH]1)NS(=O)(=O)C1CC1	DDD01081931	-19.25	29.7274
UCSD-0800873	OC(=O)c1cccc(CN2CCC(CC2)c2ccnc3ccnn23)c1	DDD01059438	-6.45667	9.31415
UCSD-0846396	CCn1cnnc1CNC(=O)N1CCC(CC1)C(=O)NC	DDD01303885	-10.0667	11.0586
UCSD-0785502	COCCCNC1=C(C(=O)C1=O)c1ccc(Cl)cc1	DDD01025655	-14.614	27.0565
UCSD-0788959	O=C(C1CCCC1)N1C[C@@H]2CCN(C[C@@H]2C1)c1cnccn1	DDD01029463	-5.05333	6.89355
UCSD-0824059	Cc1ccc(s1)C(=O)N1C[C@H]2CCC[C@@]2(COCc2cccnc2)C1	DDD01085443	-6.47633	13.1802
UCSD-0796660	Cc1cc(C)cc(OCn2ccc(n2)C(O)=O)c1	DDD01037524	-13.1833	15.2504
UCSD-0600976	CC1=CN(CC2CN(CC3=NC4=C(O3)C=CC=C4)CCO2)N=C1	DDD01300972	-7.7	9.80386
UCSD-0825301	COc1ccccc1CCc1nc(CC2CCN(C)CC2)no1	DDD01244495	-1.26033	4.17787
UCSD-0805277	FC(F)(F)c1ccc(NCC2CCS(=O)(=O)CC2)c(c1)C#N	DDD01064213	-18.7567	19.4178
UCSD-0794018	O=C(NCC1CC1)C1CN(CC11CCOCC1)C(=O)c1ccnnc1	DDD01034523	-17.89	22.2482
UCSD-0818438	CC1CN(CCO1)C(=O)NCCn1ccnc1	DDD01079506	-8.12333	9.74898
UCSD-0838178	Cc1ccc(Cl)cc1C(=O)N1CCC2(CC1)[C@@H](O)[C@H](N)c1ccccc21	DDD01257415	-8.28333	11.0689
UCSD-0799309	COc1ccccc1CN(CCCn1ccnc1)CC1CCOC1	DDD01057872	-1.33	6.58198
UCSD-0786099	OCC1N(C2CCC1(O)CC2)C(=O)c1ccco1	DDD01026286	-14.0067	24.1269
UCSD-0825830	CSCC[C@@H](CO)n1ccnc1-c1ccc(C)o1	DDD01245025	-1.96333	4.70523
UCSD-0829012	CCN1CCCC1CN(CC1CCN(CCOC)CC1)Cc1ccon1	DDD01248214	-3.80333	5.61375
UCSD-0800296	CN(C)C(=O)c1c[nH]nc1C1CCN(CC1)S(=O)(=O)c1cccc(Cl)c1	DDD01058860	-15.7733	24.2433
UCSD-0799691	COc1cccc2[nH]c(cc12)C(=O)N1CCNCC1C(N)=O	DDD01058255	-11.7587	23.2567
UCSD-0830186	CN(CCN(C)c1nc2n(C)nc(C)c2s1)C1CCCC1	DDD01249388	-12.5033	20.9824
UCSD-0820867	Cc1ccc2N(CC3CC3)CC3(CCN(CC3)C(N)=O)c2c1	DDD01082226	-13.7667	20.1154
UCSD-0838433	Clc1ccccc1NC(=O)CCC1CCN(Cc2ncc[nH]2)CC1	DDD01257671	-2.93423	7.25519
UCSD-0785033	O=C(N1CCOC[C@@H](C1)Oc1ccccc1)c1ccno1	DDD01025184	-19.7033	29.8011
UCSD-0803011	O=c1[nH]c2ncccc2n1C1CCNCC1	DDD01061593	-8.15	9.63989
UCSD-0756456	CC(C)(C)N1N=CC2=C1NC(=O)CC2C1=CC=C(OCC(N)=O)C=C1	DDD01035978	-6.34333	10.0849
UCSD-0799080	CN(C)C(=O)c1c[nH]nc1-c1ccc(CNC(=O)c2cnccn2)cc1	DDD01057643	-14.8367	21.6122
UCSD-0785336	Cc1ccc(cc1)N1C(=O)N[C@@H]2CCN([C@@H]2C1=O)C(=O)C1CC1	DDD01025487	-5.38333	8.95228
UCSD-0821308	CC1N(Cc2cnn(C)c2)CCn2c(COc3cccnc3)cnc12	DDD01082674	-3.91667	5.40117
UCSD-0844445	Cc1nc(C)n(n1)C1CCCN(C1)C(=O)c1cn2c(C)cccc2n1	DDD01301349	-5.12423	10.9511
UCSD-0802512	O[C@@H]1CN(Cc2ccc(F)cc2)C[C@@]1(O)CNC(=O)c1ccccn1	DDD01061077	-7.46	9.79531
UCSD-0784620	C(c1nnc(o1)[C@H]1CCN(C1)C1CCCCC1)c1c[nH]c2ccccc12	DDD01024771	-10.2933	15.0051
UCSD-0785163	O=C1N(Cc2ccccn2)C[C@H]2CN(CCN12)S(=O)(=O)c1ccccc1	DDD01025314	-6.31667	9.68238
UCSD-0795097	CS(=O)(=O)N1CCC(CC1)C(=O)N1CCC2(CC1)OCCCO2	DDD01035862	-8.14333	10.9808
UCSD-0786055	CN1Cc2ccccc2N(CC(O)C(F)(F)F)CCC1=O	DDD01026242	-28.0733	42.1509
UCSD-0837797	CCCc1nnc(o1)N1CCN(CC1)c1ccccc1OCC	DDD01257034	-2.65333	4.49874
UCSD-0814696	CCC(C)n1cnc(c1)S(=O)(=O)N(C)C	DDD01075242	-9.19	12.4278
UCSD-0785954	Cn1c(cc2ccccc12)C(=O)NCC1(N)CCCC1	DDD01026141	-4.61333	6.006
UCSD-0833165	CCC[C@H]1CN(C[C@@H]1NC(=O)CCn1ccnc1C)C1CCOCC1	DDD01252375	-25.2233	44.3608
UCSD-0800287	CC(C)c1ccc(NC(=O)C2CCN(CC2)c2nc(C)cc(C)n2)cc1	DDD01058851	-11.3733	22.6328
UCSD-0827869	CCn1ncnc1CN1CCc2[nH]cnc2C1CCc1ccccc1	DDD01247067	-13.1	22.556
UCSD-0830269	CN(C)CC1(O)CCCN(CC1)C(=O)Cn1ccc2ccccc12	DDD01249471	-3.61	5.06968
UCSD-0825998	CN(Cc1ccoc1)C(=O)c1cc(C)sc1NC(=O)C(C)(C)C	DDD01245193	-17.8633	17.4875
UCSD-0798827	O[C@H]1CCN(CCCOc2ccccc2F)C[C@@]11CCCO1	DDD01057390	-6.66	8.80061
UCSD-0823775	O=C(N1CCC2(C1)N(CC1CC1)S(=O)(=O)c1ccccc21)c1cccs1	DDD01085157	-6.08833	12.2821
UCSD-0839184	CC(C)c1cc(CN2CCC(N)CC2)on1	DDD01259437	-8.69667	12.7988
UCSD-0699689	COC1=CC=C(OCCN(C)C(=O)NC(C)C2=NN=CN2C)C=C1	DDD01303784	-0.76	2.77755
UCSD-0795422	COc1cccc(CN2CCCC3(CCN(C3)C(=O)c3ccco3)C2)c1	DDD01036255	-5.38333	9.4668
UCSD-0833846	COc1ccc2c(C)c(oc2c1)C(=O)NC1CCOCC1	DDD01253061	-12.02	13.0973
UCSD-0824057	Cn1cc(CN2CCCC3(CCCN3S(C)(=O)=O)C2)cn1	DDD01085441	-4.51333	10.7366
UCSD-0845377	CC1CN(CC(=O)Nc2cc(C)nn2C)CCN1c1nccs1	DDD01302564	-9.82667	10.4275
UCSD-0794112	Cc1csc(n1)[C@@H]1C[C@@H]2CCN(C[C@H]2O1)C(=O)c1cccn1C	DDD01034617	-0.443333	3.8642
UCSD-0823773	O=C(Cc1ccccn1)N1CCC2(CC(CO2)Oc2ccccn2)CC1	DDD01085155	-0.221	2.63804
UCSD-0846072	Cc1ccc(cc1)-c1nnc(CN2CCOC(Cn3cccn3)C2)o1	DDD01303465	-9.08333	11.3018
UCSD-0807250	CN1CCC(CC1=O)C(=O)N1CCC(CC1)=Cc1cccc(F)c1	DDD01066480	-11.77	14.2606
UCSD-0794111	CN(C)CC(=O)N1C[C@@H](Oc2ccccn2)[C@H]2OCCC[C@@H]12	DDD01034616	-6.14667	9.40193
UCSD-0834078	CCCc1nc(CN(CC)C(=O)c2ccc(OC)c(OC)c2)no1	DDD01253293	-5.37333	8.6747
UCSD-0794975	CCOC(=O)CN1CCC2(CC1)CC(=O)c1ccc(OC)cc1O2	DDD01035739	-4.98333	11.7947
UCSD-0805963	CC(C)(C)n1ncc(NCC(O)c2ccc(F)c(F)c2)c(Cl)c1=O	DDD01064986	-11.8133	12.3254
UCSD-0588319	CC1=CC=C(C=C1)C1=NC(CCNC(=O)CCN2CCOC2=O)=CO1	DDD01303801	-7.65	8.47216
UCSD-0791769	Cn1cc2CCOC(CNCc3ccco3)c2n1	DDD01032273	-18.96	30.3851
UCSD-0825973	Clc1cccc2c(cc(nc12)-c1ccco1)C(=O)N1CC[C@H]2CNC[C@@H]12	DDD01245168	-10.1733	14.1006
UCSD-0844571	CCNC(=O)NC(=O)CN(CC(C)O)c1ccccc1	DDD01301500	-19.3233	23.1943
UCSD-0743133	COC1=C(OC)C=C(C=C1)C1=NOC(=N1)C(=O)NCCN1CCCCC1	DDD01036028	-7.58333	8.71816
UCSD-0784920	C[C@@H](NCc1ccc(F)cc1)c1onc(C)c1C(O)=O	DDD01025071	-10.37	12.937
UCSD-0830144	CCc1cc(NCCNc2ccncc2C)n2nc(C)c(C)c2n1	DDD01249346	-10.8833	17.5717
UCSD-0789042	CN1CC2(CC1=O)CCCCN2C(=O)c1ccsc1	DDD01029546	-3.55667	4.91274
UCSD-0822158	Cc1ccc(nn1)N1CCO[C@H]2CN(Cc3ccccn3)C[C@@H]12	DDD01083532	-16.6033	26.2241
UCSD-0799535	C(N1CCC(CC1)c1ccc2OCOc2c1)c1ccncc1	DDD01058098	-18.24	22.8954
UCSD-0795113	COc1ccccc1NC(=O)NCC(O)(C1CC1)c1ccccc1	DDD01035878	-15.31	19.4029
UCSD-0788535	CC(=O)N1CCCC2(CCN(CC2)C(=O)c2nccnc2N)C1	DDD01029039	-7.32	8.23002
UCSD-0798519	Cn1nccc1CN1CCOC(C1)c1cccc(n1)-c1cncnc1	DDD01057082	-20.96	27.383
UCSD-0786113	Clc1cccc(c1)-c1cnc2NCCC(=O)N(Cc2c1)C1CC1	DDD01026300	-10.88	14.6773
UCSD-0784816	CC(C)(C)CN1CCN2[C@@H](CN(C3CCCCC3)C2=O)C1	DDD01024967	-6.95	9.8184
UCSD-0816186	CCc1cnc(s1)N1CCN(Cc2ccon2)CC1	DDD01076967	-24.4533	37.435
UCSD-0788409	O=C(N1CCCC2(CCC(=O)N2)CC1)c1ccccn1	DDD01028913	-17.0967	16.7878
UCSD-0837891	O=C(C1CN(C2CC2)C(=O)C1)N1CCN(CCn2cccc2)CC1	DDD01257128	-22.6367	22.1271
UCSD-0786216	COc1ccc2OCC(C)(C)C=C3CN(Cc1c23)S(C)(=O)=O	DDD01026403	-19.2833	22.3626
UCSD-0844410	Fc1cc(F)cc(NC(=O)CCNC(=O)c2ccoc2)c1	DDD01301299	-11.6867	15.3087
UCSD-0795926	C(C1CC1)N1CCCC2(C1)COCCN(C2)c1cnccn1	DDD01036759	-6.01333	7.87005
UCSD-0801013	CN1CCN(CC1)C(=O)C1CCN(C1)c1cccnn1	DDD01059578	-11.2267	13.5891
UCSD-0784885	COCC(=O)N[C@H](C)c1c(noc1C(O)=O)-c1ccc(Cl)cc1	DDD01025036	-6.19	6.9726
UCSD-0821303	CN1CCN(CC1)[C@@H]1CN([C@@H]2CCCO[C@H]12)C(=O)c1ccc(C)nc1	DDD01082669	-26.3933	37.6159
UCSD-0814509	Cc1nnc(SCC(O)COCc2ccco2)n1-c1ccc(C)cc1	DDD01075025	-9.37	9.8596
UCSD-0803024	CC(O)c1cn(Cc2ccc(Cl)cc2Cl)nn1	DDD01061606	-2.40667	3.87596
UCSD-0798501	Cc1cn[nH]c1C1COCCN1Cc1ccc(C)nc1	DDD01057064	-12.0433	14.7624
UCSD-0845822	COCC(=O)NC(C)Cc1cccc(Br)c1	DDD01303125	-2.33667	3.8483
UCSD-0824055	CCO[C@@H]1CO[C@]2(C1)CCCN(C2)S(=O)(=O)c1cccnc1	DDD01085439	-2.42	3.96372
UCSD-0794005	Cc1ccsc1C(=O)N1CCn2cnc(COCC3CC3)c2C1	DDD01034510	-2.98667	4.995
UCSD-0802514	Cc1ncsc1CN1C[C@@H](O)[C@](O)(CNC(=O)c2ccccn2)C1	DDD01061079	-10.8467	10.9233
UCSD-0802557	CN(C)C(=O)C1CN(C)CCN(Cc2cscn2)C1	DDD01061122	-4.50667	5.4654
UCSD-0794862	CCC(CO)NCc1ccc(o1)-c1ccccc1	DDD01035588	-5.91	9.83006
UCSD-0825611	CSc1ncccc1C(=O)N(C)CCc1scnc1C	DDD01244806	-15.7333	24.943
UCSD-0811428	CN(Cc1cccc(F)c1)C(=O)CN1CCCC(Cn2cncn2)C1	DDD01071440	-9.02	18.2569
UCSD-0834805	CCC[C@@H]1CN(Cc2ccccc2SC)C[C@H]1NC(C)=O	DDD01254023	-9.11	12.7082
UCSD-0791927	CC(=O)N1CC(=O)N(CC11CCN(Cc2ccoc2)C1)c1ccsc1	DDD01032431	-4.55333	9.8436
UCSD-0802900	CC(=O)N1CCC2(CC1)CC(NS(C)(=O)=O)c1ccccc1O2	DDD01061475	-13.2533	18.9735
UCSD-0800192	COc1ccccc1C1(O)CCCN(C1)C(=O)c1ccnn1C(C)C	DDD01058756	-9.31133	18.0137
UCSD-0789235	O=C(CC1CCCC1)N1CC[C@H]2[C@H]1CCN2c1nncs1	DDD01029739	-6.77	12.1536
UCSD-0809718	CCc1ccc(o1)C1COCCN1C(=O)Nc1ccc(cc1)C#N	DDD01069373	-8.14667	12.853
UCSD-0819506	O=C(N1CCCC1C1CCN(Cc2ccccc2)CC1)c1ccco1	DDD01080749	-8.29333	13.4506
UCSD-0835906	CC(=O)Nc1ccc(cc1C)C(=O)Nc1cnc2CCCCn12	DDD01255131	-13.6533	13.2538
UCSD-0788164	O=S(=O)(Nc1cnn(c1)C1CCOCC1)c1ccc(cc1)C#N	DDD01028668	-10.6733	14.0576
UCSD-0785494	COCCCNC1=C(C(=O)C1=O)c1ccccc1	DDD01025647	-22.1733	35.6812
UCSD-0836820	CN(C)CC1(O)CCN(C1)C(=O)Cc1ccc(Cl)c(Cl)c1	DDD01256048	-12.23	19.8704
UCSD-0709828	CN(C)CCN(CC1=CC=C(Cl)C=C1)C(=O)C1=NNC=C1	DDD01080489	-9.99	13.034
UCSD-0838278	Cc1nnc(SCC(=O)N2CCC3(CC2)C(O)Cc2ccccc32)o1	DDD01257516	-10.4767	10.5134
UCSD-0795859	CN(C)Cc1cc(=O)n2CCCN(Cc2n1)C(=O)Cc1ccsc1	DDD01036692	-9.61	15.1866
UCSD-0802967	CN1CC(=O)N(Cc2c(NC3CCNCC3)ncnc12)C1CCC1	DDD01061542	-14.09	20.2731
UCSD-0823193	Cc1cccc(CN2C[C@@H]3COC[C@]3(CNC(=O)c3ccccc3)C2)n1	DDD01084571	-19.4267	21.5321
UCSD-0823992	Cc1nc(CN2CCO[C@H]3[C@H](CC[C@H]23)OCc2ccccn2)cs1	DDD01085376	-4.47	5.22621
UCSD-0812285	CNc1cc(ncn1)N1CCCC1CNCc1cccs1	DDD01072499	-4.43667	6.83244
UCSD-0824002	O=c1cc(Cn2cncn2)nc2CN(CC3CC3)CCCn12	DDD01085386	-9.46667	9.67592
UCSD-0828114	CC(C)N1CCC(CC1)C(=O)N(C)CC(=O)c1ccc(O)cc1	DDD01247314	-11.6033	11.3578
UCSD-0823993	COCCN1[C@@H]2CCN([C@@H]2CC1=O)C(=O)COc1ccccc1	DDD01085377	-3.46333	8.34653
UCSD-0795912	Cn1cc(CN2CC[C@H]3O[C@@H](CC[C@@H]23)C(=O)NCc2ccco2)cn1	DDD01036745	-7.61333	8.07258
UCSD-0794027	Cc1cccc(n1)C(=O)N1CCn2cnc(COCC3CC3)c2C1	DDD01034532	-3.75633	7.53889
UCSD-0844446	Cc1nc(C)n(n1)C1CCCN(C1)C(=O)c1cccc2[nH]ncc12	DDD01301350	-16.6133	19.6318
UCSD-0798688	CCC1CCCCN1C(=O)Cn1nc(cc(N)c1=O)-c1ccc(C)s1	DDD01057251	-7.50667	15.2371
UCSD-0823651	Fc1cccc(c1)C(=O)N1CCN2C[C@@H](C[C@H]2C1)OCc1cccnc1	DDD01085032	-2.10567	4.46499
UCSD-0827496	CNC(=O)c1ccnc(CC2COc3c(C2)cccc3OC)c1	DDD01246694	-14.0533	13.7067
UCSD-0796334	CC(C)NC(=O)[C@@]12CCO[C@@H]1CCN(Cc1cc(C)on1)C2	DDD01037167	-11.6533	13.6505
UCSD-0799826	CC(C)CC(NC(=O)c1ccco1)c1nc2cccnc2n1C	DDD01058390	-18.6333	22.0137
UCSD-0839492	CNc1nc(nc2CN(CC3CC3)CCc12)C1CCCN1C(C)=O	DDD01270248	-10.2033	10.0401
UCSD-0830103	CCN(Cc1noc(C)n1)Cc1cccc(OCC(C)=C)c1	DDD01249305	-14.0567	20.5654
UCSD-0809151	COc1cc(ccc1F)C(=O)N1CCCC1CC(=O)c1cnn(C)c1	DDD01068697	-15.1767	14.3446
UCSD-0823947	O=C(N1CCC2(COC(COc3ccccn3)C2)CC1)C1=CCCCC1	DDD01085331	-10.5433	10.5705
UCSD-0792968	Cc1ccc2CN(CCN(CC3CC3)c2n1)C(=O)NC1CC1	DDD01033473	-7.02	10.1458
UCSD-0837260	CN(C)[C@@H]1CN(C[C@H]1c1ccc(C)cc1)S(=O)(=O)c1cc(C)ccc1F	DDD01256495	-7.96333	9.17813
UCSD-0812092	CCOCC(=O)Nc1cc(C)cnc1OC	DDD01072255	-27.7533	32.2933
UCSD-0829461	CN(C)C[C@H]1C[C@@H](CO)CN(C1)C(=O)CCc1nc(Cl)n[nH]1	DDD01248663	-8.72	13.5269
UCSD-0798736	Cc1ccccc1C(=O)N1C[C@@H](O)[C@@H](C1)N1CCOCC1	DDD01057299	-7.86333	13.9369
UCSD-0819470	CC(C)c1noc(CN(Cc2cccs2)C2CC2)n1	DDD01080708	-7.20333	10.1941
UCSD-0782480	O=C(N1CCSCC1)c1cnc(nc1)-c1cccnc1	DDD01253370	-3.80667	6.85683
UCSD-0839486	Cc1ncncc1C(=O)Nc1cnn(CC(=O)NC2CCCC2)c1	DDD01270242	-3.56333	5.94384
UCSD-0810358	COCCN1CCN(CCS(=O)(=O)c2cccc(OC)c2)CC1	DDD01070151	-8.46333	9.15414
UCSD-0838904	COc1ccccc1OCc1cc(n[nH]1)C(=O)N1CCN[C@H](C)C1	DDD01258142	-6.20667	8.39898
UCSD-0528741	COC(=O)C1=C(OC)C2=C(N=C1)N(C)N=C2C	DDD00730142	-14.27	21.5696
UCSD-0785918	CC(C)CN(C)C(=O)Cn1c(C)c(C)nc1-c1ccoc1	DDD01026105	-1.63333	2.84577
UCSD-0788452	COCCN1C(=O)CCC11CCCN(Cc2ccccc2F)C1	DDD01028956	-5.13333	5.60579
UCSD-0790738	Cn1cnc2CCN(C(C(=O)N3CCCC3)c12)S(C)(=O)=O	DDD01031242	-9.65333	9.48676
UCSD-0788960	CCOCC(=O)N1C[C@@H]2CCN(C[C@@H]2C1)c1cnccn1	DDD01029464	-7.86	10.8695
UCSD-0796324	CC(C)N(C)Cc1nnc2CN(CCCn12)C(=O)c1ccco1	DDD01037157	-10.4	12.9748
UCSD-0845602	Cc1ccc(o1)C(CNC(=O)NCc1cc[nH]n1)N1CCOCC1	DDD01302849	-7.12	10.0624
UCSD-0839149	Cc1nn(c(O)c1\C=C1/C(=O)NC(=O)C(C#N)=C1C)-c1ccccc1	DDD01259402	-15.3333	14.8937
UCSD-0634403	CC(C)N1CCN2C(C1)=NC1=CC(=CC=C21)C(N)=O	DDD01036027	-16.1	15.4204
UCSD-0834360	CCC(NS(=O)(=O)c1ccc(cc1)C(=O)NC1CC1)c1ccnn1C	DDD01253576	-10.57	11.0746
UCSD-0823997	Fc1cnc(nc1)N1CCOCC2(CCCN(C2)c2nncs2)C1	DDD01085381	-0.696667	3.25048
UCSD-0796522	CC(Oc1ccc2OCOc2c1)C(=O)Nc1cc(C)on1	DDD01037386	-14.7267	19.5105
UCSD-0814817	COc1ncccc1C(=O)N1CCCC1c1c(C)n[nH]c1C	DDD01075369	-5.92333	6.94042
UCSD-0833822	CSc1nccc(n1)N1CCC(CC1)NCc1ccc2nsnc2c1	DDD01253037	-19.78	18.9073
UCSD-0800112	O=C(CC1CCN(CCc2ccccc2)CC1)NC1CCOCC1	DDD01058676	-20.45	24.198
UCSD-0825428	O=C(NCCn1cccc1)C(N1CCCC1)c1cccnc1	DDD01244623	-11.3867	11.2424
UCSD-0805285	FC(F)(F)CNC(=O)CN1CCCC(C1)c1ncc[nH]1	DDD01064221	-16.298	30.0529
UCSD-0831278	CC(C)c1noc(CCNC(=O)C2COc3ccccc3C2)n1	DDD01250484	-21.76	29.6822
UCSD-0822679	O=C(NCc1cccnc1)[C@@H]1CC[C@@H]2[C@@H](CCN2c2ncccn2)O1	DDD01084055	-21.1967	23.0368
UCSD-0834259	Cc1cccc(CN2CCN(CC2CCO)c2ncnc3[nH]cnc23)n1	DDD01253475	-7.66667	10.6369
UCSD-0837138	CN1CCC(CC1)Oc1ccc(NC(=O)c2ccc(C)cc2C)cc1	DDD01256373	-17.3767	28.2522
UCSD-0796333	O=C(NCC1CC1)C1CN(CC11CCOCC1)C(=O)c1cccnc1	DDD01037166	-11.1767	12.6529
UCSD-0846307	Cc1cc(C)n(CC2CCCCN2CCCS(N)(=O)=O)n1	DDD01303767	-8.48	8.40602
UCSD-0804315	CNS(=O)(=O)c1cccc(CNCc2ccsc2)c1	DDD01063115	-32.3467	34.3134
UCSD-0800703	CN(C)c1cc(ccn1)C1CCCN(C1)S(=O)(=O)C1CCCC1	DDD01059268	-17.4467	18.2842
UCSD-0823421	O=S(=O)(N1CC[C@]2(C[C@H](CO2)OCC2CC2)C1)c1ccccc1	DDD01084800	-26.5533	30.9381
UCSD-0828363	Clc1ccc(cc1)C(=O)N1CCC2(CC1)C(=O)Nc1ccccc21	DDD01247563	-1.94	3.33353
UCSD-0792144	CC1N(CCn2c(Cn3cncn3)cnc12)C(=O)[C@H]1CCCO1	DDD01032648	-9.04533	15.7534
UCSD-0707247	CC(CN1C=CC=N1)NC(=O)NCC1=CC=CS1	DDD01303879	-15.24	21.944
UCSD-0697411	CC1=CC(NC(=O)NCC2CCOC2)=NO1	DDD01303870	-4.055	8.44139
UCSD-0796541	CCn1nccc1CNC(=O)C1CCC1	DDD01037405	-14.201	16.5298
UCSD-0798909	CN(CC1(C)COC1)C(=O)c1cc(nc2ccccc12)-c1ccn(C)n1	DDD01057472	-9.49867	13.6997
UCSD-0787484	CN(C)CC1COCCN1C(=O)c1ccccc1C(=O)c1ccccc1	DDD01027988	-17.944	25.3146
UCSD-0594002	CN1C=NN=C1C1CCCN(C1)C(=O)C1=CC(Cl)=C2OCOC2=C1	DDD01303887	-9.09033	11.9501
UCSD-0786127	CNC(=O)[C@@H]1[C@H]2CNCCN2C[C@H]1c1ccccc1	DDD01026314	-18.6473	31.6838
UCSD-0823538	Cc1nnc(o1)[C@@H]1CC[C@@H]2[C@@H](CCN2S(=O)(=O)c2cccnc2)O1	DDD01084917	-18.4463	16.8786
UCSD-0834197	OCC1CCCN(CCNC(=O)c2ccc3scnc3c2)C1	DDD01253413	-11.881	11.1938
UCSD-0823709	O=C(NC[C@]12COC[C@H]1CN(Cc1cccnc1)C2)c1ccno1	DDD01085091	-2.056	3.46186
UCSD-0825095	CC(C)[C@H]1CN(Cc2nnc(C)s2)C[C@@H]1NC(=O)C1CCOCC1	DDD01244289	-23.1523	22.4205
UCSD-0800489	Fc1cccc(CN2CCC(CC2)c2noc(n2)-c2ccncc2)c1F	DDD01059054	-11.6947	18.7186
UCSD-0822192	Cn1ccnc1CN1C[C@@H]2OCCN([C@@H]2C1)c1ncccn1	DDD01083566	-16.9583	21.0119
UCSD-0846246	Cc1nn2cccnc2c1C(=O)N1CCCC(C1)n1ccnc1	DDD01303690	-9.364	9.83745
UCSD-0828592	Cc1cc(C)n2nc(cc2n1)C(=O)N1CCCC2(CNC(=O)O2)C1	DDD01247792	-16.7337	15.8242
UCSD-0838383	Cc1ccc(cc1N1CCNC1=O)C(=O)N1Cc2ccccc2C1	DDD01257621	-16.0013	20.4954
UCSD-0784927	CN1C[C@@H](F)[C@H](C1)OCc1nc2ccc(cc2[nH]1)C#N	DDD01025078	-7.23467	7.05909
UCSD-0839489	Cc1cn[nH]c1C1CCCCN1C(=O)CCN1CCCCCC1	DDD01270245	-5.35333	7.11513
UCSD-0837515	COc1nc2CCCc2cc1C(=O)N1C[C@@H](N)C[C@H]1C(=O)NC(C)C	DDD01256751	-14.4023	22.0653
UCSD-0823422	CCOC1COC2(C1)CCN(CC2)S(=O)(=O)c1cccc(C)c1	DDD01084801	-29.276	35.7015
UCSD-0824106	CN1CCN(CC1)C(=O)C[C@H]1CCOc2ccc(C)cc12	DDD01235825	-3.265	4.84698
UCSD-0784627	Cn1cncc1-c1nnc(o1)[C@H]1CCN(Cc2ncc[nH]2)C1	DDD01024778	-4.795	4.89727
UCSD-0833026	CCCN(Cc1ccc(cc1)S(=O)(=O)NC)Cc1ccccc1OC	DDD01252236	-5.86167	6.39873
UCSD-0824191	CN(C)CCSc1nccc(n1)-c1cnc(C)nc1-c1ccco1	DDD01235910	0.243	0.539869
UCSD-0840162	CC(NC(=O)NCc1c(F)cccc1Cl)(C(O)=O)c1ccco1	DDD01295888	-6.552	6.68856
UCSD-0824080	CC(=O)NCC[C@H]1CC(C)(C)Oc2ccccc12	DDD01235799	-9.91867	11.3591
UCSD-0846239	CN(Cc1nnc(o1)C1CC1)C1CCN(CCCc2cnn(C)c2)C1	DDD01303683	-8.881	10.7912
UCSD-0802261	Cc1cc(on1)-c1cnc(nc1-c1ccc(C)s1)N1CCSCC1	DDD01060826	-10.6597	10.8726
UCSD-0790117	O=C(N1CCc2nnc(COc3cncnc3)n2CC1)c1cccs1	DDD01030621	-1.53667	2.19395
UCSD-0827197	CCOc1cccc(c1)C(=O)N1CCC2(CC1)[C@H](O)C[C@@H]2OC	DDD01246394	-12.6997	11.7696
UCSD-0847349	Cn1nc2CCN(Cc3nnc(o3)-c3ccc(F)cc3)Cc2cc1=O	DDD01305085	-11.2513	14.6057
UCSD-0820943	CCCN1CCC(CC1)c1nc2ccc(C)cn2n1	DDD01082302	-16.1463	17.0318
UCSD-0800194	Cc1cc(CN2CCc3nc(C)nc(O)c3CC2)c(C)s1	DDD01058758	-11.9487	13.4855
UCSD-0819126	OC1CCN(Cc2ccccc2CNC(=O)Nc2cccnc2)CC1	DDD01080284	-7.654	7.28847
UCSD-0805035	COCCN(C(=O)c1cc(C)no1)c1ccc(cc1)C#N	DDD01063942	-21.7717	30.8209
UCSD-0820641	CC(C)C(=O)N1CC[C@H]2N(C)CC[C@]2(CC1)C(=O)Nc1cccnc1	DDD01081997	-17.224	21.5341
UCSD-0786688	Cn1c(cc2ccccc12)C(=O)Nc1nc[nH]n1	DDD01027191	-28.4423	49.4175
UCSD-0839482	Cc1cncc(n1)C1CCCN(C1)C(=O)c1c[nH]c(=O)[nH]c1=O	DDD01270238	-10.278	11.5992
UCSD-0785799	CC(=O)N1CCC(=CC1)n1c2ccccc2[nH]c1=O	DDD01025986	-3.80233	5.47526
UCSD-0786085	CCCC1CN(CCOC)C(=O)c2cccnc2O1	DDD01026272	-27.9953	41.9966
UCSD-0792394	COCCN1C[C@@H](C)[C@]2(C1)COCCN(C2)C(=O)c1ccncc1	DDD01032898	-5.579	5.49624
UCSD-0839196	CS(=O)(=O)N1CCCC(C1)C(=O)Nc1cnn(Cc2ccc(F)cc2)c1	DDD01259449	-11.15	11.677
UCSD-0843669	Cc1nn(C)c(C)c1C1CCCN1CC(=O)Nc1cccnc1	DDD01300374	-11.4517	10.7045
UCSD-0793242	Cc1ccc(cn1)C(=O)N1CCC2(CCN2c2ncccn2)C1	DDD01033747	-3.237	3.77783
UCSD-0816630	Clc1ccc(nc1)C(=O)NCCCc1nc(=O)[nH][nH]1	DDD01077474	-0.656667	1.50188
UCSD-0800201	CCN1CCCC1CNCc1cc2cc(OC)c(OC)cc2[nH]c1=O	DDD01058765	-15.7713	27.5676
UCSD-0825352	COc1cccc(c1)[C@H]1CN(C[C@@H]1N)C(=O)c1scc2CCCCc12	DDD01244547	-17.381	21.9096
UCSD-0785798	CNC(=O)c1csc(n1)-c1cccnc1	DDD01025985	-7.63267	9.87457
UCSD-0791727	COCCn1cc2CCOC(CNCc3nccs3)c2n1	DDD01032231	-11.5137	17.2723
UCSD-0821162	CCN1CCc2c(CNC(=O)c3nccn3C)cncc2C1	DDD01082526	-2.56233	2.68941
UCSD-0786078	CN1C(=O)[C@H](OC(N)=O)[C@@H](C(=O)Nc2ccccc2)C11CCNCC1	DDD01026265	-17.155	22.8082
UCSD-0812661	COc1ccc(cc1Br)S(=O)(=O)N1CCC(C1)OCc1ccccn1	DDD01072922	-7.373	7.71705
UCSD-0819504	CCc1cc(NCc2ccccc2CN2CCCC2)n2ncnc2n1	DDD01080747	-10.8363	14.6705
UCSD-0829535	COCCN(Cc1ccccc1Cl)C(=O)c1c(C)cc(C)[nH]c1=O	DDD01248737	-6.41667	9.38852
UCSD-0798649	CCOc1cc(ccc1OC)[C@H]1N[C@H](Cc2ccsc12)c1nc(C)cs1	DDD01057212	-15.0127	19.426
UCSD-0802132	CC(C)N1CCCC(C1)c1nc(C)cc(n1)-c1ccccc1C(O)=O	DDD01060697	-5.05433	6.62745
UCSD-0799221	CN(C)c1nccc(n1)C1CCCCN1Cc1cnn2cccnc12	DDD01057784	-14.531	20.5851
UCSD-0824256	CS(=O)(=O)NCc1cc(nc(n1)N1CC[C@H](O)C1)-c1cc(F)cc(F)c1	DDD01235975	-9.21533	12.6283
UCSD-0802549	Cc1nc(CCC(=O)NC2CCC2)cc(n1)C1CCNCC1	DDD01061114	-3.254	5.08506
UCSD-0798984	Cc1cnc(cn1)-c1nc(no1)C1CCN(Cc2ccccc2Cl)CC1	DDD01057547	-4.0487	7.49441
UCSD-0631125	CC1=C(C=NC(=N1)N1CCCCC1)C1=CC(=O)NC(=N1)N1CCCC1	DDD01256109	-6.42467	6.12918
UCSD-0805797	Cc1cnn(CCNCC(=O)N2CCN(CC2)c2ccccc2)c1	DDD01064797	-16.616	15.8603
UCSD-0800129	C(Nc1ncc(-c2cnccn2)c(n1)C1CC1)c1ccncc1	DDD01058693	-14.05	16.6939
UCSD-0800881	CC(=O)Nc1nc(cs1)C1CN(C1)C(=O)C1CCC1	DDD01059446	-5.755	5.45893
UCSD-0835718	OCCNc1cc(ncn1)N1CCN(Cc2ccccc2)C(CCO)C1	DDD01254942	-8.85533	13.068
UCSD-0786753	CC(C)n1nc(O)c2C(SCC(=O)Nc12)c1cnn(C)c1C	DDD01027257	-17.6593	25.0856
UCSD-0821305	CC1N(Cc2ccc(C)o2)CCn2c(COc3cccnc3)cnc12	DDD01082671	-23.584	34.0059
UCSD-0837718	C(Cc1ccccc1)Nc1ncnc2CCN(Cc3c[nH]cn3)CCc12	DDD01256955	-17.9233	23.9303
UCSD-0820208	O=S(=O)(C1CC1)N1CCCn2nnc(Cn3cccc3)c2C1	DDD01081560	-12.672	12.9435
UCSD-0789431	CN(C)C[C@H]1C[C@@H]2CN(C[C@@H]2O1)C(=O)c1ccco1	DDD01029935	-8.176	13.2183
UCSD-0789022	C[C@H]1CN(CC2CCOCC2)C[C@@]11CCN(Cc2cccnc2)C1=O	DDD01029526	-7.62733	8.19052
UCSD-0791427	CS(=O)(=O)N1CCC2(COC(COc3cccnc3)C2)CC1	DDD01031931	-14.914	16.6111
UCSD-0802141	Cc1nc(Nc2ncccn2)cc(n1)C1CCCN1Cc1ncc[nH]1	DDD01060706	-9.543	12.2156
UCSD-0824442	COC(C)(C)C(=O)N[C@H]1CN(C[C@@H]1C(C)C)c1nccnc1N(C)C	DDD01243635	-10.121	9.96242
UCSD-0845010	Cc1ccc(NS(=O)(=O)c2cc3OCCOc3c(c2)C(O)=O)c(F)c1	DDD01302103	-14.2267	13.446
UCSD-0831294	Cc1cc(nc(C)n1)-c1nc(no1)-c1c(C)ncc2CNCCc12	DDD01250500	-18.9943	23.3884
UCSD-0788078	CC(C)C(=O)N1CCN(CC1)c1cc(cnn1)N(C)C	DDD01028582	-21.2983	33.0964
UCSD-0824203	CN(CCO)c1ncc(cn1)-c1ccnn1C1CCN(CC1)C(C)=O	DDD01235922	-9.842	17.1987
UCSD-0785968	COc1ccc2[nH]c(cc2c1)C(=O)NCC1(N)CCCCC1	DDD01026155	-19.2867	26.6199
UCSD-0784996	COCCN1C[C@H]2CN(Cc3cccc(OC(F)(F)F)c3)CCN2C1=O	DDD01025147	-12.309	11.0281
UCSD-0819555	NC(=O)CCN1CCC(CC1)C(=O)c1cc(F)ccc1F	DDD01080802	-7.42667	7.83866
UCSD-0806331	FC(F)(F)c1cc(n[nH]1)C1CCCN(Cc2cccnc2)C1	DDD01065401	-24.979	26.4552
UCSD-0800000	CN(C)C(=O)c1cn[nH]c1C1CCCN1c1nc(C)cc(C)n1	DDD01058564	-15.165	25.331
UCSD-0800697	CNC(=O)c1cn[nH]c1C1CCN(Cc2cn(C)nc2C)C1	DDD01059262	-9.365	15.3769
UCSD-0836954	CCN1CCN(CC1)S(=O)(=O)c1ccc(Cc2cc(C)n[nH]c2=O)cc1	DDD01256185	-14.1523	12.5292
UCSD-0846394	Cc1cc(no1)C(=O)NCc1ccc(cc1)N1CCCC(C1)C(N)=O	DDD01303880	-9.18667	8.48154
UCSD-0786280	O=C1NCC2=C1C(Nc1ccccc1N2)c1ccccc1	DDD01026484	-8.19733	9.13517
UCSD-0839269	CCCn1ncc2c(cc(nc12)C1CC1)C(=O)Nc1n[nH]c(SC)n1	DDD01259523	-4.901	5.3143
UCSD-0833569	CC(NC(=O)c1cn(C\C=C\c2ccccc2)nn1)c1n[nH]c(C)n1	DDD01252783	-3.112	4.57389
UCSD-0800777	Cc1cc2c(nc3CCN(CCn3c2=O)C(=O)c2nn(C)cc2Cl)s1	DDD01059342	-14.1457	20.0854
UCSD-0583651	NC(=O)CN1C=C(NC(=O)N2CCCC2)C=N1	DDD01302850	-7.428	7.2772
UCSD-0836740	Cc1ccc(o1)-c1cc([nH]n1)C(=O)NCCC1=CCCCC1	DDD01255968	-11.5787	10.617
UCSD-0792843	OC(=O)c1ccc2N(CC3(CCCCC3)c2c1)C(=O)c1cccc(F)c1	DDD01033348	-4.02867	5.45797
UCSD-0802807	O=C(C1CCCC1)N1CC2(CCN(CC2)C2COC2)Cc2ccccc12	DDD01061382	-23.7463	26.3507
UCSD-0786685	COCCn1ccc2c(cccc12)C(=O)NC(C)C	DDD01027188	-26.9497	37.0746
UCSD-0838924	O[C@H]1CCN(C[C@@H]1O)C(=O)c1coc(COc2cccc(F)c2)n1	DDD01258162	-17.8563	15.8184
UCSD-0824005	COc1ccc(CN2C[C@@H]3COC[C@]3(CN(C)C)C2)cc1	DDD01085389	-7.34033	6.56573
UCSD-0821307	CC(C)CN1CCN(C)C(=O)C11CCN(CC1)C(=O)c1cc(C)oc1C	DDD01082673	-21.329	27.697
UCSD-0794113	CN1CC(=O)N(CC11CCN(Cc2ccncc2)C1)c1cccc(F)c1	DDD01034618	-6.12347	6.40712
UCSD-0799831	CC[C@@H](Cn1ncc2ccccc2c1=O)NC(=O)c1cnccn1	DDD01058395	-17.32	29.8611
UCSD-0785453	CC(C)(C)CC(=O)NC[C@H]1OC[C@@H](NCc2ccccn2)[C@@H]1O	DDD01025604	-9.31913	11.7585
UCSD-0800130	C[C@H]1CN2C[C@H](O)CC2CN1Cc1ccc2nccnc2c1	DDD01058694	-13.4245	20.5718
UCSD-0828349	O=C(CN1CC(CC1=O)c1ccccc1)N1CCC(CC1)c1ncc[nH]1	DDD01247549	-23.1813	20.3321
UCSD-0815774	CCN(Cc1nc(no1)C1CC1)Cc1ccc(cc1F)C#N	DDD01076486	-7.38607	9.95869
UCSD-0822191	Fc1ccccc1CN1C[C@@H]2OCCN([C@@H]2C1)c1ncccn1	DDD01083565	-22.6841	30.1608
UCSD-0838483	CCOc1ccc2[nH]c(=O)c(CN3CCC(O)CC3)cc2c1	DDD01257721	-19.5859	20.8074
UCSD-0795449	COCCN1CCCC11CCN(CC1)C(=O)CC1CCCC1	DDD01036282	-17.7723	30.7679
UCSD-0784828	C[C@@H](NC(=O)c1cccs1)c1onc(c1C(O)=O)-c1cccnc1	DDD01024979	-13.5965	13.9682
UCSD-0800889	CCC(CC)C(=O)N1CCN(Cc2nc3ccccc3c(=O)[nH]2)CC1	DDD01059454	-8.79694	7.91017
UCSD-0844403	CCOc1ncccc1C(=O)N1CCCC(C1)n1nc(C)nc1C	DDD01301291	-11.6706	13.0107
UCSD-0802270	Fc1ccc(cc1)S(=O)(=O)N1CCCC1c1cc[nH]n1	DDD01060835	-4.78106	6.20951
UCSD-0801412	CCCC(=O)N1CCC(CC1)c1cc2N[C@H](C)C[C@@H](n2n1)C(F)(F)F	DDD01059977	-14.4984	18.4004
UCSD-0813702	FC(F)(F)CN1CCC(CCNC(=O)C2COCCO2)CC1	DDD01074117	-14.306	21.3928
UCSD-0756392	COC1=CC=C(C=C1)C1CC(=O)NC2=C1C=NN2C	DDD01035691	-13.7367	13.5009
UCSD-0823268	O=C(Cc1ccccc1)N1CCCC2(C1)COCCN(CC1CC1)C2	DDD01084647	-7.50237	9.58097
UCSD-0803673	CC(=O)NC(Cc1c[nH]c2cc(F)ccc12)C(=O)Nc1cnn(C)c1	DDD01062393	-5.7663	5.08285
UCSD-0800791	OCCNC(=O)C1(Cc2ccccc2-c2ccncc2)CCOCC1	DDD01059356	-27.6461	29.8373
UCSD-0824976	CCn1ncc2C(CC(=O)Nc12)c1cnc(NCc2ccccc2)nc1	DDD01244170	-2.32903	2.39331
UCSD-0831710	Clc1cccc(CNC(=O)CCC2CCN(CC2)C(=O)c2cc[nH]c2)c1	DDD01250917	-16.2879	19.4159
UCSD-0825616	CCCN1CCCn2nc(CNS(=O)(=O)c3cnn(CC)c3)cc2C1	DDD01244811	-15.0586	20.2542
UCSD-0820441	Fc1cccc(CN2C[C@H]3CN(C[C@H]3C2)c2ncccn2)c1	DDD01081797	-18.4928	27.4978
UCSD-0791912	CCN1CCn2c(C)cnc2C11CCN(CC1)C(=O)NC	DDD01032416	-8.4047	12.5999
UCSD-0823830	Cn1cc(cn1)C(=O)N1CC[C@@H]2[C@@H]1CCN2Cc1cccc(F)c1	DDD01085213	-6.42857	9.29754
UCSD-0833400	CC(C)Oc1ccc(CN2CCCC(C2)N2CCOCC2)cc1CO	DDD01252613	-9.48977	9.21155
UCSD-0825343	COc1ccc(cn1)C1CC(=O)NCc2nc3ccccn3c12	DDD01244538	-16.0367	14.3068
UCSD-0825755	CCC[C@H]1CN(C[C@@H]1NC(=O)CCCn1ccnc1)C1CCOCC1	DDD01244950	-22.972	30.1179
UCSD-0801179	CN1CCCC(C1)c1ccnc(c1)C(=O)NCC1CC1	DDD01059744	-10.2263	10.9146
UCSD-0809290	Cc1cnn(CCNCC(O)COc2cccc(c2)C(F)(F)F)c1	DDD01068864	-5.42433	6.04018
UCSD-0829045	Cc1nc2CN(Cc2c(=O)n1C)C(=O)C1CCN(CC1)C(=O)C1CCC1	DDD01248247	-16.4427	14.4868
UCSD-0829665	O=C(C1CCOCC1)N1C[C@@H]2CC[C@H]1CN(C2)C1Cc2ccccc2C1	DDD01248867	-14.18	18.3944
UCSD-0794014	CN(Cc1cn2CCN(Cc2n1)C(=O)N(C)C)Cc1ccco1	DDD01034519	-9.14467	8.4532
UCSD-0800281	CN(C)c1cc(ccn1)C1CCCN1C(=O)CCc1cnn(C)c1C	DDD01058845	-14.1273	18.8724
UCSD-0591909	O=C(CCC1=CC2=C(OCO2)C=C1)N1CCCC(C1)N1C=CC=N1	DDD01301509	-17.925	19.2576
UCSD-0826919	Cc1ccc(C)c2c1[nH]c(CN1CC[C@@H](N)[C@H](O)C1)cc2=O	DDD01246114	-11.462	15.8636
UCSD-0832722	COc1ccccc1C(N1CCCN(CC1)C1CCCC1)C(O)=O	DDD01251931	-11.927	12.6979
UCSD-0824923	CCCN1CCCn2nc(CNS(=O)(=O)c3cccc(F)c3)cc2C1	DDD01244117	-12.46	19.8823
UCSD-0785501	COCCNC1=C(C(=O)C1=O)c1ccc(Cl)cc1	DDD01025654	-19.9903	30.8195
UCSD-0798211	Cc1cc(C)nc(Nc2nccnc2C2CCCN(C2)C(CO)CO)n1	DDD01056774	-2.545	3.69735
UCSD-0802126	CNc1cccc(n1)C1CCN(CC1)C(=O)c1cccnc1	DDD01060691	-15.181	19.6136
UCSD-0802439	Nc1cc(CCC2CN(Cc3ccc4OCCOc4c3)CCO2)ccn1	DDD01061004	-19.7917	19.4133
UCSD-0794567	Cc1cc(=O)[nH]c(=O)n1COCCOCc1ccccc1	DDD01035161	-12.2283	13.1374
UCSD-0822638	CNC(=O)[C@@]12CCO[C@@H]1CCN(Cc1cccc(C)c1)C2	DDD01084014	-12.788	16.2807
UCSD-0813039	CCN(C(C)CS(C)(=O)=O)C(=O)NCCc1cccc(F)c1F	DDD01073352	-19.603	16.9026
UCSD-0594506	CC1=CN(CC2CN(CCO2)C2=NC3=C(C=CC=C3)N=C2)N=C1	DDD01303469	-10.8423	9.94631
UCSD-0810825	CC(C)(C)c1noc(OCC(=O)NCC(F)(F)F)n1	DDD01070713	-15.877	15.6353
UCSD-0840001	Cc1ccc(cc1)-c1nc(CN2CCN(CCO)CC2)co1	DDD01295682	-18.6563	17.6983
UCSD-0789279	O=C(NC1CC1)c1nc2CN(Cc2o1)c1ncccn1	DDD01029783	-3.74467	4.87028
UCSD-0794090	COCC1CN(Cc2cn(C)nc12)C(=O)COc1ccc(C)cc1	DDD01034595	-8.653	7.81665
UCSD-0785315	CC(=O)N1CC[C@H]2CC(=O)N(CC[C@H]2C1)C1CC1	DDD01025466	-17.678	22.928
UCSD-0844586	Cc1ccc2cccc(C(=O)N3CCN(CC3)c3cccnn3)c2n1	DDD01301521	-18.8827	17.9476
UCSD-0818167	O=C(NC1CCc2ccccc2C1)N1CCN(CC1)C(=O)C1CCC1	DDD01079208	-8.11867	6.66782
UCSD-0821526	Cn1cc(CNC2CC3(CCN(CC3)S(C)(=O)=O)c3ccccc23)cn1	DDD01082896	-25.057	23.5876
UCSD-0835136	FC(F)(F)c1cccc(OCc2cc(n[nH]2)C(=O)NC2CCCNC2)c1	DDD01254355	-28.0577	24.8517
UCSD-0839186	CC(C)c1cc(CN2CCC(CC(O)=O)CC2)no1	DDD01259439	-13.2313	11.0959
UCSD-0807068	CCS(=O)(=O)CCN1CCN(CC1)C1CCC(CC1)C(C)C	DDD01066264	-21.0683	27.4201
UCSD-0837272	O=C(CN1CC(CC1=O)c1ccccc1)N1CCC(CC1)C#N	DDD01256507	-8.89233	12.4519
UCSD-0799815	OC(=O)c1ccccc1-n1cnc(CN2CCCc3ccccc23)c1	DDD01058379	-19.97	21.2842
UCSD-0727623	C(C1CCCN(CC2=NC3=C(O2)C=CC=C3)C1)N1C=NC=N1	DDD01296527	-13.8097	11.5691
UCSD-0835901	Cc1ccccc1CN(CCO)Cc1ncc[nH]1	DDD01255126	-19.6477	29.1503
UCSD-0832004	Cc1sc2nc(CCN)nc(N3CCN(CC3)S(C)(=O)=O)c2c1C	DDD01251212	-12.9427	16.6745
UCSD-0800491	COc1cc2cc3CN(Cc4ccco4)CCOc3nc2cc1OC	DDD01059056	-7.14767	6.134
UCSD-0694821	OC(CNC(=O)NCC1=NNC=C1)C1=C(F)C=CC=C1	DDD01299014	-12.6557	10.4696
UCSD-0844285	CCn1cnnc1CNC(=O)N1CCN(CCc2ccccc2)CC1	DDD01301139	-6.42733	7.29546
UCSD-0831381	CC(C)c1cc(N2CCC(C2)N(C)C)n2nccc2n1	DDD01250587	-7.65867	9.84445
UCSD-0786847	Fc1ccc2[nH]c3C(CCCc3c2c1)NC(=O)c1n[nH]c2CCCCc12	DDD01027351	-4.03933	5.34888
UCSD-0799302	CC(C(=O)N1CCCC1)n1nc(cc(N)c1=O)-c1cccs1	DDD01057865	-10.903	15.8059
UCSD-0831476	Cc1ccc(CN2CCN(CC2CCO)c2cc(NCCO)ncn2)o1	DDD01250682	-8.84167	8.23758
UCSD-0791236	O=C(N1CCCC1)c1c2ccccn2c2ncnc(N3CCOCC3)c12	DDD01031740	-5.55333	6.94728
UCSD-0795434	NC(=O)N1CCC2(CC1)CN(Cc1cccnc1)C(=O)CO2	DDD01036267	-10.3773	10.9969
UCSD-0800420	Clc1ccc(NC(=O)c2ccco2)c(c1)C(=O)NCCN1CCOCC1	DDD01058984	-11.7617	15.138
UCSD-0790118	CN(C)CCOCc1nnc2CCN(CCn12)c1cnccn1	DDD01030622	-6.38633	6.60375
UCSD-0837513	CN(C)C(=O)c1nc(CN2CC(Cc3ccccc3)CC2=O)no1	DDD01256749	-18.045	24.6861
UCSD-0820862	Cc1ccoc1C(=O)N1CC[C@@H]2CN(CCO[C@@H]2C1)C1CCOCC1	DDD01082221	-20.9467	30.81
UCSD-0821304	CC1N(Cc2nc(C)cs2)CCn2c(COc3cccnc3)cnc12	DDD01082670	-20.1877	24.5872
UCSD-0808565	CC(C)c1nc2CCC(Cn2n1)NCc1nc(C)c(C)o1	DDD01068004	-23.1027	20.3013
UCSD-0799825	CC(C)CC(NC(=O)c1cccs1)c1nc2cccnc2n1C	DDD01058389	-18.8077	23.2253
UCSD-0784819	C[C@@H](NC(=O)c1cccn1C)c1c(noc1C(O)=O)-c1ccc(Cl)cc1	DDD01024970	-4.41067	4.03731
UCSD-0805465	CC(C)CN(CC(O)=O)C(=O)c1cccc(C)c1	DDD01064409	-6.16433	4.9065
UCSD-0799992	CC(C)c1nnc(CCC(=O)N2CCOC(C2)c2cnccn2)o1	DDD01058556	-11.5943	14.3011
UCSD-0823953	Cc1ccc(o1)C(=O)N1CCC2(COC(COc3ccccn3)C2)CC1	DDD01085337	-3.87467	4.47486
UCSD-0799077	CC(C)c1cc(no1)C(=O)N1CCC2(C1)CCc1ccccc1C(=O)N2	DDD01057640	-7.70467	8.10001
UCSD-0821300	CNC(=O)c1cc2CCN(CCc2nc1N(C)C)c1ncc(C)cn1	DDD01082666	-21.846	34.2798
UCSD-0800890	Cc1cc(O)nc(n1)C1CN(CCO)CCO1	DDD01059455	-9.66	10.2687
UCSD-0801101	Cc1nc(nc(O)c1C)C1CCCN1C(=O)Cc1ccc(F)cc1	DDD01059666	-11.521	15.1119
UCSD-0821234	CC(C)N1CCOCC2(CCN(CC2)c2ncc(C)cn2)C1	DDD01082598	-21.6247	27.3563
UCSD-0784756	O[C@@H]1[C@@H](CNC(=O)c2ccncc2)OC[C@H]1NCc1ccccn1	DDD01024907	-4.765	6.87193
UCSD-0827626	CC(Cn1nc(C)cc1C)Nc1nc(nc2CNCc12)-c1ccncc1	DDD01246824	-12.506	15.6608
UCSD-0822840	C(N1CCCC2(CCN(CC2)c2ncccn2)C1)c1ccncc1	DDD01084216	-18.8993	30.5739
UCSD-0785430	COc1ccc2n3[C@@H](CNCc4cnn(C)c4)COCc3nc2c1	DDD01025581	-3.849	2.63079
UCSD-0828580	Oc1cc(CN2CCC(O)(Cn3ccnc3)CC2)nc2c(Cl)cccc12	DDD01247780	-8.257	6.42007
UCSD-0828134	O=C(CCc1ccccc1)C1CCCN(Cc2cncn2C2CC2)C1	DDD01247334	-5.21733	6.34614
UCSD-0823594	CN(C)C(=O)COC1COC2(C1)CCN(CC2)c1ccc(C)nn1	DDD01084974	-8.65767	6.74635
UCSD-0788747	CC(C)NC(=O)N1CCC2(CCC(=O)N2CCN(C)C)CC1	DDD01029251	-8.458	6.66786
UCSD-0827017	CN(CC1Cc2ccccc2CN1C)C(=O)CSc1ccccn1	DDD01246214	-15.926	13.3841
UCSD-0798683	Cc1csc2c(nc(C)n12)C1CCN(CCCOc2ccccc2)CC1	DDD01057246	-13.3997	13.795
UCSD-0802944	O=C(NC1CCCCC1)N1CCCC1c1nnc2CNCCn12	DDD01061519	-25.3673	31.0516
UCSD-0814856	CN(C1CCC(CC1)NC(=O)OC(C)(C)C)C(=O)c1ccc[nH]1	DDD01075414	-12.3347	12.2702
UCSD-0823186	CC(=O)N1CCC2(CCCN2Cc2cnn(C)c2)CC1	DDD01084564	-20.11	21.9179
UCSD-0800802	Cc1ccsc1CN(CCCO)Cc1nc2ccccc2[nH]1	DDD01059367	-6.74233	5.05811
UCSD-0792395	COCCN1C[C@@H](C)[C@]2(C1)COCCN(C2)C(=O)c1ccccn1	DDD01032899	-4.38033	4.36077
UCSD-0786719	CN1CCN(CCCNC(=O)CCc2nc3cc(Br)cnc3[nH]2)CC1	DDD01027222	-22.364	36.4921
UCSD-0749975	CCOC(=O)N1CCN(CC1)C(=O)C1=C(N=NS1)C1=CC=CC=C1	DDD01035382	-9.751	10.0345
UCSD-0785948	CN(C)C(=O)c1cc([nH]n1)-c1ccccc1	DDD01026135	-6.28667	5.68494
UCSD-0611259	C(C1CN(CC2=NOC(=N2)C2=CC=CC=C2)CCO1)N1C=CC=N1	DDD01303715	-7.03333	5.30306
UCSD-0791651	CC(C)NC(=O)c1ccc2NC(=O)C3(CCN(CC3)C(C)C)c2c1	DDD01032155	-6.15667	4.78953
UCSD-0786677	CC(C)n1nc(O)c2C(SCC(=O)Nc12)c1c(C)nn(C)c1C	DDD01027180	-24.9767	39.1028
UCSD-0821086	COC[C@@]12CCC[C@@H]1CN(C2)C(=O)COc1ccccc1OC	DDD01082450	-20.3733	19.5943
UCSD-0801825	CS(=O)(=O)N1CCCC(Cc2cncc(n2)-c2ccccc2C(O)=O)C1	DDD01060390	-11.4	11.7746
UCSD-0839193	Cc1cn(Cc2cccc(C)c2)nc1N	DDD01259446	-13.7433	11.1562
UCSD-0836304	CN(CCc1c(C)n[nH]c1C)C(=O)C(N1CCOCC1)c1cccnc1	DDD01255529	-13.21	13.1786
UCSD-0795451	CCC(CO)NC(=O)c1ccc2ccc(N(C)CC3CC3)n2c1	DDD01036284	-16.11	18.6756
UCSD-0791900	CCN1CCn2c(C)cnc2C11CCN(CC1)C(=O)NCC(C)C	DDD01032404	-9.97667	11.6106
UCSD-0800298	OC1(CN2CCN(CC2)c2ccccc2)CCN(C1)C(=O)CC1CC1	DDD01058862	-19.3633	26.2216
UCSD-0785895	OC(=O)c1csc(NCCc2ccccc2)n1	DDD01026082	-20.56	29.9137
UCSD-0786739	Oc1nn(C2CCCCC2)c2NC(=O)CSC(c12)C(F)(F)F	DDD01027242	-24.7833	40.0295
UCSD-0846329	CC(=O)NC1CCCN(C1)C(=O)NCc1cccnc1-n1cccn1	DDD01303791	-14.0567	11.7351
UCSD-0797879	CC(C)c1ccc(OCn2ccc(n2)C(=O)N2CCCC2)cc1	DDD01038772	-12.7933	11.4684
UCSD-0787705	Cn1nc(C2CCN(CC(=O)NC3CC3)CC2)n(-c2ccccc2)c1=O	DDD01028209	-16.0667	17.562
UCSD-0844385	COc1c(C2CCCN2C(=O)c2ccc(nn2)N(C)C)c(C)nn1C	DDD01301265	-15.5333	12.5117
UCSD-0590974	CC(NC(=O)N(C)CC1=CC=NC=C1)C1=NN=CN1C	DDD01080497	-18.67	18.1187
UCSD-0791926	CN1C(C)=N[C@@]2(CC[C@@H]3CN(Cc4ccccc4F)C[C@H]23)C1=O	DDD01032430	-16.84	13.7197
UCSD-0787488	COc1cccc(C(=O)N2CCOCC2CN(C)C)c1OC	DDD01027992	-14.2067	11.711
UCSD-0786161	CC(C)(O)CN1CC(C)(C)CN(CC1=O)C(=O)CCc1ccccc1	DDD01026348	-13.8433	14.1574
UCSD-0824982	CCNc1ncc(cn1)C(=O)N(C)CCc1nc2cc(Cl)ccc2[nH]1	DDD01244176	-16.0433	16.3956
UCSD-0784655	F[C@@H]1CN(Cc2cccc(c2)C#N)C[C@@H]1OCc1nc2ccccc2[nH]1	DDD01024806	-13.01	11.885
UCSD-0838799	COc1ccccc1Oc1ncccc1CNC(=O)C(C)N1CCCC1	DDD01258037	-6.45667	7.95333
UCSD-0822159	COCC1CN(Cc2c(C)noc2C)Cc2ccnn2C1	DDD01083533	-19.8867	18.4277
UCSD-0845553	FC(F)(F)COc1ccc(cn1)C(=O)NCC1CCOC1	DDD01302781	-10.7533	9.47241
UCSD-0839476	O=C(N1CCCC(C1)c1cccc(n1)-n1ccnc1)c1cc[nH]n1	DDD01270232	-5.16	3.77926
UCSD-0846877	CCc1nccn1C1CCCN(C1)C(=O)c1csc(NC(C)=O)n1	DDD01304494	-10.16	15.3636
UCSD-0802808	O=C(C1CCCC1)N1CC2(CCCN(C2)C2COC2)Cc2ccccc12	DDD01061383	-23.7633	29.0219
UCSD-0795571	CCCC(=O)N1CC[C@H]2[C@@H](CC1)S(=O)(=O)CCN2Cc1cccnc1	DDD01036404	-10.69	11.3038
UCSD-0786160	CC(O)CN1CC(C)(C)CN(CC1=O)C(=O)CCc1ccccc1	DDD01026347	-11.33	16.7803
UCSD-0823825	CCOCC1CN(Cc2nnn(CC3CC3)c12)C(=O)c1cscn1	DDD01085208	-16.4433	17.26
UCSD-0785509	Cc1nnc(NC(=O)CSCc2cc(=O)n3ccccc3n2)s1	DDD01025662	-19.6867	24.5075
UCSD-0802794	OC(=O)C1(CCN(CC1)C(=O)c1ccc2OCOc2c1)c1ccccc1	DDD01061369	-14.49	16.1566
UCSD-0784839	CN(Cc1cc(C[C@@H]2C[C@H](N)C2(C)C)no1)c1ccccc1	DDD01024990	-6.32	4.7905
UCSD-0786738	Clc1ccc(cc1)C1=NN(CN2CCSCC2)C(=O)CC1	DDD01027241	-23.19	26.4024
UCSD-0828913	C(N1C[C@@H]2CC[C@H]1CN(Cc1nnc(o1)C1CC1)C2)c1ccccc1	DDD01248115	-13.7633	15.635
UCSD-0788937	CN1[C@H]2CN(Cc3ccc(C)o3)C[C@H]2C[C@@H]1C(=O)NCC1CC1	DDD01029441	-8.16	7.64759
UCSD-0805269	Fc1ccc(cc1)-c1nn(CC2CCOC2)c(=O)o1	DDD01064205	-17.3567	23.3167
UCSD-0799396	CC(=O)NC1Cc2ccc(cc2C1)S(=O)(=O)NCCNc1ccccn1	DDD01057959	-14.5033	22
UCSD-0785337	O=C(N1CC[C@H]2NC(=O)N(Cc3ccccc3)C(=O)[C@@H]12)c1ccccc1	DDD01025488	-4.80667	3.95265
UCSD-0795574	O=C(NCc1ccccc1)N1CCC2(C1)CN(C(=O)C2)c1ccsc1	DDD01036407	-8.00333	5.85859
UCSD-0799292	Cc1nc(C)c(o1)C(=O)N1Cc2ccccc2OCC1Cn1ccnc1	DDD01057855	-14.9033	17.2437
UCSD-0791838	Cn1cc(CN2CCC(F)(F)C3(CCN(C3)c3cccnc3)C2)cn1	DDD01032342	-18.6367	25.3232
UCSD-0788497	O=C(NC1CCCC1)c1n[nH]c2CCNCc12	DDD01029001	-14.21	11.7364
UCSD-0796577	CC(Cn1cc(Br)cn1)C(=O)Nc1ccc(Br)cn1	DDD01037441	-19.31	21.0064
UCSD-0837146	CCC(NS(C)(=O)=O)c1ccccc1C	DDD01256381	-21.1767	19.8851
UCSD-0784646	F[C@@H]1CN(Cc2cccnc2)C[C@@H]1OCc1nc2ccccc2[nH]1	DDD01024797	-15.8433	14.4356
UCSD-0795903	CN1CCc2onc(CNc3ncccn3)c2C1	DDD01036736	-13.5733	14.7134
UCSD-0832477	COc1cccc(OCCN2CC[C@](O)([C@H](C)C2)C2CCOCC2)c1	DDD01251686	-19.2533	19.8466
UCSD-0838891	CCCN1CCCn2nc(CNS(=O)(=O)c3ccc(C)cc3)cc2C1	DDD01258129	-8.35333	6.27714
UCSD-0830130	COCCN1C[C@@H]2CC[C@H]1CN(CC(=O)Nc1ccn(C)n1)C2	DDD01249332	-16.72	13.7807
UCSD-0789044	O=C(N1CCCCC11CN(CC2CC2)C(=O)C1)c1ccccc1	DDD01029548	-6.62667	8.55654
UCSD-0825244	O=C(CSCC1CC1)N1CCCC2(CCC(=O)N(CC3CC3)C2)C1	DDD01244438	-21.56	23.5934
UCSD-0846749	CN(Cc1cnn(C)c1)C(=O)Nc1ccc(C)c(OCC(F)F)c1	DDD01304327	-12.5967	11.6808
UCSD-0795363	CO[C@@H]1CCN([C@H]1Cc1ccccc1)C(=O)c1ccccn1	DDD01036196	-14.8667	15.1054
UCSD-0798044	Cc1ccc(cn1)-c1nc(no1)C1CCN(CC1)C(=O)c1ccnn1C	DDD01056607	-9.51	9.32563
UCSD-0799212	CN1CCC(CC1)c1cccc(NCc2ccncc2)n1	DDD01057775	-13.28	16.4051
UCSD-0824009	CCc1ncnc2CCN(Cc3ccc(OC)cc3)CCc12	DDD01085393	-7.4	5.49255
UCSD-0698970	CCN1C=NN=C1CNC(=O)N1CCC(CC1)OCC1=CC=CC=C1	DDD01301138	-4.69333	2.94551
UCSD-0839139	Cn1nccc1CNC(=O)Cn1nc(cc1C1CC1)C(F)(F)F	DDD01259392	-11.5067	10.8586
UCSD-0795790	Cc1ccc(cn1)C(=O)N1CCC2(CC1)NC(=O)CC2c1ccccc1	DDD01036623	-8.59333	6.77574
UCSD-0786195	CN1CCN2C[C@@H](CO)[C@@H]([C@H]2C1)c1ccccc1	DDD01026382	-16.43	21.6879
UCSD-0786194	CCOC(=O)COC1CCN(CC(=O)N(C)c2ccccc12)C(C)=O	DDD01026381	-23.9567	37.6306
UCSD-0847049	CC(=O)N(Cc1noc(C)n1)C1CCN(Cc2ccccc2C#N)C1	DDD01304704	-7.44	5.31786
UCSD-0839462	CN(Cc1ccc(F)cc1)[C@@H]1CN(C[C@H]1O)C(=O)c1cccs1	DDD01270218	-5.25333	4.47395
UCSD-0839956	CC(NC(=O)NCCS(C)(=O)=O)c1ccc2NC(=O)CCc2c1	DDD01295633	-13.7733	16.786
UCSD-0802540	Oc1cc(nc(n1)C1CCN(C1)C(=O)c1ccncc1)-c1ccncc1	DDD01061105	-4.43333	3.45008
UCSD-0788946	O=C(NCC1CC1)C1CCC2(CCN(CC2)C(=O)c2ccoc2)O1	DDD01029450	-7.35333	6.1757
UCSD-0834086	Cc1c([nH]c2ccccc12)C(=O)NCC1CCN(Cc2ccco2)C1	DDD01253301	-12.9	9.91363
UCSD-0810824	CCOCC(O)CN1CCN(CC1)C(=O)c1ccncc1	DDD01070712	-21.8333	27.9459
UCSD-0796633	CC(Cn1cc(Br)cn1)C(=O)Nc1cc(C)on1	DDD01037497	-18.8333	15.5876
UCSD-0828043	CN(C)CCN(C)C1CCCN(C1)C(=O)c1ccc(Cn2ccnc2)o1	DDD01247243	-15.0833	20.8578
UCSD-0838325	Cc1ccc(cc1)-c1cn[nH]c1C1CCCN(C1)c1nccc(N)n1	DDD01257563	-17.7367	19.6606
UCSD-0795937	Cc1noc(C)c1CN1CC[C@H]2OCC[C@H]([C@@H]2C1)C(=O)NCC1CC1	DDD01036770	-16.7733	17.3187
UCSD-0820442	COCCN1CCc2ncnc(NC(C)C)c2CC1	DDD01081798	-21.3167	31.0478
UCSD-0815997	Cc1ccc(OCC(O)COC2CCOCC2)c(Cl)c1	DDD01076746	-14.4733	15.5372
UCSD-0826080	COc1cc(Oc2ccc(cn2)C#N)ccc1CN1CCCC1	DDD01245275	-23.3767	26.7426
UCSD-0785028	Cc1noc(C)c1CNCC1(COc2cccnc2)C[C@H](O)[C@H](O)C1	DDD01025179	-16.4933	22.6058
UCSD-0788949	Cc1nc(CN2[C@H]3CCN(Cc4cnn(C)c4)[C@@H]3CC2=O)cs1	DDD01029453	-10.85	8.21142
UCSD-0794755	CN1CCc2c(C1)sc1NC(NC(=O)c21)C=Cc1ccccc1	DDD01035441	-22.3967	33.8889
UCSD-0820644	Cc1cnc(nc1)N1C[C@@H]2CN(CCC[C@@]2(C1)C(O)=O)C1CCOC1	DDD01082000	-20.5433	28.7321
UCSD-0785006	CC(=O)N1CCOC[C@@H](C1)Oc1ccc(cc1)C(F)(F)F	DDD01025157	-17.17	19.0391
UCSD-0831020	OCCN(Cc1ccsc1)Cc1ccccc1	DDD01250225	-17.77	14.716
UCSD-0834851	CCc1nn(C)c(Cl)c1CN1CCN(CC1)c1ccc(Cl)nn1	DDD01254070	-19.4067	20.8826
UCSD-0836896	Cc1cc(Cc2ccc(cc2)S(=O)(=O)N2CCSCC2)c(=O)[nH]n1	DDD01256126	-12.8467	17.9925
UCSD-0798210	O=C(N1CCCC1)c1ccnc(c1)C1CCNCC1	DDD01056773	-21.71	20.876
UCSD-0795381	CCN1CCC2(CC1)C=C(C(=O)NC1CC1)c1ccccc21	DDD01036214	-29.1633	46.7139
UCSD-0836977	CCSc1nsc(NC(=O)COc2ccc3OCOc3c2)n1	DDD01256209	-26.2467	33.0406
UCSD-0801093	C[C@H](NC(=O)C1CC1)c1nc2cc(ncn2n1)-c1ccc(F)cc1	DDD01059658	-6.64	4.32149
UCSD-0846238	FC(F)(F)Cn1ccnc1CN1CCCC1c1noc(n1)C1CC1	DDD01303682	-9.92333	8.8138
UCSD-0835283	COc1ccc2[nH]c(=O)c(CN(C)CCN3CCCC3)cc2c1	DDD01254503	-11.5567	10.2859
UCSD-0796173	COc1ccc(CN2C[C@@H]3COC[C@]3(COc3cccnc3)C2)cc1	DDD01037006	-17.8267	15.0631
UCSD-0829000	CN(CCCc1cnn(C)c1)C(=O)C1CCCN(C1)C1CCCC1	DDD01248202	-13.76	10.9401
UCSD-0821684	CN(C)C(=O)CN1CCC2(C1)COCc1cnc(nc21)-c1cccnc1	DDD01083054	-17.7733	26.1954
UCSD-0714030	COC1=CC=C(OCCN2CCC(CC2)C2=CC=NN2CCO)C=C1	DDD01295933	-9.72667	7.02027
UCSD-0789031	CNC(=O)[C@@H]1C[C@H]2CN(Cc3ccc(C)s3)C[C@H]2N1C(C)=O	DDD01029535	-14.13	12.3072
UCSD-0802432	O[C@@H]1CN(Cc2ccc3[nH]ccc3c2)C[C@H]1NC(=O)c1cscn1	DDD01060997	-22.4333	21.4859
UCSD-0800584	CN1CCC(CC1)c1cccc(n1)-c1ccc(cc1)C(O)=O	DDD01059149	-25.6	22.3564
UCSD-0786843	Cc1nc(C(=O)N2CCN(CC2)S(C)(=O)=O)c(s1)-c1ccccc1Cl	DDD01027347	-18.72	22.7049
UCSD-0801181	CC(C)n1ccnc1CN1CCCC1c1cccc(n1)-n1ccnc1	DDD01059746	-2.08333	0.36074
UCSD-0830087	C(CNc1cccnc1)NC1CCSC1	DDD01249289	-6.9	5.82487
UCSD-0823835	COc1cc(ncn1)N1C[C@@H]2COC[C@]2(COCc2cccc(C)n2)C1	DDD01085218	-8.87667	7.40104
UCSD-0795372	Cc1cccc(CN2CCc3nnc(CO)n3CC2)n1	DDD01036205	-10.7433	8.04566
UCSD-0831253	NC(=O)C1CCN(CC(=O)N(Cc2nccs2)Cc2ccccc2)CC1	DDD01250458	-23.88	24.4989
UCSD-0831510	CN(CCCn1nc(C)cc1C)C(=O)CN1CC2(CCNCC2)OC1=O	DDD01250716	-11.85	8.77482
UCSD-0800496	Cc1cnc(cn1)-c1nc(O)c2CCN(Cc2n1)C(=O)C1CCCO1	DDD01059061	-18.0833	20.7269
UCSD-0788936	COc1ncccc1CN1C[C@@H]2C[C@H](N(C)[C@@H]2C1)C(=O)NCC1CC1	DDD01029440	-9.53	8.14694
UCSD-0792798	COc1ccc(CN2C[C@@H]3CN(C[C@@H]3C2=O)C(=O)c2ccsc2)cc1	DDD01033303	-4.05333	3.49763
UCSD-0786091	CNC(=O)[C@@H]1[C@@H](OC(=O)Nc2ccccc2)C(=O)N(C)C11CCNCC1	DDD01026278	-19.3233	26.087
UCSD-0821569	CS(=O)(=O)N1CCC2(CC(NCc3ccco3)c3ccccc23)CC1	DDD01082939	-19.9567	19.8919
UCSD-0832450	CCc1ccc(o1)C1CC(=O)Nc2cc(NS(C)(=O)=O)ccc12	DDD01251659	-19.16	16.3362
UCSD-0847343	OC(=O)c1csc(c1)S(=O)(=O)Nc1cccc(OC(F)F)c1	DDD01305079	-10.46	8.16987
UCSD-0834036	CN(Cc1cnn(C)c1)C(=O)c1cc(COc2cc(C)ccc2C)on1	DDD01253251	-18.5967	21.4823
UCSD-0829701	Cc1cccc(c1)C1CCCN(C1)C(=O)CN1C(=O)CCNC1=O	DDD01248903	-15.4967	12.0294
UCSD-0801414	COCC(=O)N1CCC(CC1)c1cc2N[C@H](C)C[C@@H](n2n1)C(F)(F)F	DDD01059979	-11.6967	9.53043
UCSD-0788957	CCN1CCOCC2(CCCN(C2)C(=O)c2ccncc2F)C1	DDD01029461	-7.01667	4.66807
UCSD-0788830	CCOC1COC2(C1)CCN(Cc1ccc(C)cc1)CC2	DDD01029334	-8.22667	10.4627
UCSD-0822879	COCCN1CCOCC11CCN(CC1)C(=O)c1ccoc1	DDD01084256	-27.3067	22.1766
UCSD-0827933	O=C1CC2(CCCC2)CC(=O)N1CCn1cnnc1	DDD01247132	-18.7733	18.2561
UCSD-0826661	CCOc1ccc(cc1)C(=O)N1C[C@@H]2CC[C@H]1CN(C2)C(=O)C1CCC1	DDD01245856	-32.41	37.1828
UCSD-0839537	COc1cccc(c1)-c1noc(n1)C1CCN(Cc2cn(C)nc2C)C1	DDD01270293	-13.0767	11.3875
UCSD-0804009	Cc1ccc(cc1)C1CSCCN1C(=O)c1ccccn1	DDD01062773	-3.88333	1.8516
UCSD-0817247	CCc1cnc(NC(=O)NC2CCN(CC2)C2CCCC2)s1	DDD01078167	-21.4467	18.1637
UCSD-0824073	CC[C@@H](CO)Nc1cc(ncn1)-c1cn[nH]c1	DDD01235792	-5.11667	2.85402
UCSD-0824102	CC(=O)N1CCC(CC1)n1nccc1-c1cnc(N)nc1	DDD01235821	-21.98	17.4476
UCSD-0845275	FC(F)(F)c1cc(n[nH]1)C1CCCN(C1)C(=O)c1nc(=O)[nH][nH]1	DDD01302444	-12.1233	13.6408
UCSD-0822957	CCOCC1CN(Cc2cnn(C)c2)Cc2cnn(C)c12	DDD01084335	-20.2	27.321
UCSD-0803334	Cc1nnc(CN2CCCCC2c2nc(no2)-c2ccccc2)s1	DDD01062005	-8.67667	7.31228
UCSD-0828593	Cc1ccc(CN2CCC3(C2)C(=O)N(CC(N)=O)c2ccccc32)s1	DDD01247793	-22.09	23.9916
UCSD-0828550	CC(=O)NCC(=O)N1CCc2[nH]c(nc2C1)-c1ccccc1	DDD01247750	-16.6033	23.4119
UCSD-0802797	CC(C)C1=NOC2(C1)CCN(CC2)S(C)(=O)=O	DDD01061372	-22.2533	29.4343
UCSD-0785070	CNC(=O)[C@H](N1CCC[C@H]1C(=O)NC1CC1)c1ccccc1F	DDD01025221	-12.3	11.9804
UCSD-0792186	O=C(N1CCCO1)[C@@]12CCO[C@@H]1CCN(Cc1cccs1)C2	DDD01032690	-14.8033	19.7998
UCSD-0786117	NC(=O)CN1CC(O)c2ccccc2S1(=O)=O	DDD01026304	-22.7333	25.8055
UCSD-0800417	CNc1nccnc1C1CN(Cc2ccc3[nH]ccc3c2)CCO1	DDD01058981	-18.1367	18.5116
UCSD-0785913	CC(C)c1ccc(NC(=O)C2OC(=NN2C(C)=O)c2cccs2)cc1	DDD01026100	-11.9233	12.1192
UCSD-0833398	CCn1cnc(NC(=O)N2CCC(C2)c2ccc(Cl)cc2)n1	DDD01252611	-12.59	14.8893
UCSD-0831373	CCc1nn(C)c(Cl)c1CN1C[C@@H](NC(=O)N(C)C)[C@@H](C1)C(C)C	DDD01250579	-10.06	11.1695
UCSD-0823189	O=C(NC[C@]12COC[C@H]1CN(Cc1cccs1)C2)c1ccsc1	DDD01084567	-21.72	26.3219
UCSD-0834083	CC(N(C)C(=O)C1CCN(CC(N)=O)CC1)c1ccon1	DDD01253298	-17.09	17.8629
UCSD-0784997	COCCN1C[C@H]2CN(Cc3cccc(OC)c3)CCN2C1=O	DDD01025148	-10.0267	9.98666
UCSD-0802341	Cc1ccn(CCC(=O)N2CCCC(Cc3cccnc3)C2)n1	DDD01060906	-7.10333	5.86461
UCSD-0802892	CS(=O)(=O)N1Cc2ccccc2CC2(CCN(Cc3ccccn3)C2)C1	DDD01061467	-22.4367	22.7785
UCSD-0846611	Cc1cc(NC(=O)CCN2CCCCC2Cn2nc(C)nc2C)no1	DDD01304152	-14.1367	10.5253
UCSD-0786765	CC(C)c1sc(Br)nc1C(=O)NCc1ccco1	DDD01027269	-14.5667	16.0135
UCSD-0792268	CN(C)CCOCc1nnc2CCN(CC3CC3)CCn12	DDD01032772	-22.2167	30.5817
UCSD-0824437	Cc1cc2ccccc2n1CCC(=O)NCCS(C)(=O)=O	DDD01243630	-14.44	14.9965
UCSD-0802140	Cc1nc(Nc2ccccn2)cc(n1)C1CCCN1Cc1ncc[nH]1	DDD01060705	-5.89333	4.54719
UCSD-0784826	C[C@@H](NC(=O)c1cccnc1)c1onc(c1C(O)=O)-c1ccccc1	DDD01024977	-5.08333	3.22571
UCSD-0800120	COCCNC(=O)C(C)N1CCN(C)CC1	DDD01058684	-14.2067	15.7547
UCSD-0811783	CC(N1CCCN(CC1)C(=O)Oc1ccccc1)C(=O)N(C)C	DDD01071865	-19.0433	14.7646
UCSD-0846315	CN(Cc1ncc(C)o1)C1CCN(Cc2ccccc2C#N)C1	DDD01303775	-4.84333	3.41295
UCSD-0610355	CCSCC1=CC=C(C=C1)C(=O)N1CCCN(CC)CC1	DDD01065001	-20.8433	20.566
UCSD-0838206	O=C1CCCN1CCC1CCCCN1S(=O)(=O)c1cccc(c1)C#N	DDD01257444	-12.82	11.2483
UCSD-0823996	C(C1CC1)N1CCC2(CC1)CCN(CC2)c1ncccn1	DDD01085380	-11.3167	16.007
UCSD-0800280	CNc1cc(ccn1)C1CCCN1C(=O)CCc1ccccc1F	DDD01058844	-15.8567	16.6119
UCSD-0794764	Cc1ccc(C)c(c1)-c1[nH]c2ccccc2c1C(O)=O	DDD01035459	-8.57	9.68315
UCSD-0824129	CC1(C)C[C@H](CCNC(=O)c2ccncc2)c2ccccc2O1	DDD01235848	-10.7833	12.4908
UCSD-0820166	C(C1CCOC1)N1C[C@@H]2OCCN([C@@H]2C1)c1cccnc1	DDD01081516	-31.64	34.5226
UCSD-0819320	COc1ccccc1OCC(=O)Nc1ncccc1Cl	DDD01080529	-12.96	14.8607
UCSD-0806576	CC(C)Oc1ccc(NCc2ccc(cc2)[S+](C)[O-])c(F)c1	DDD01065694	-19.4	26.7391
UCSD-0800696	CN(C)CC(=O)N1CCCC(C1)c1csc(NC(C)=O)n1	DDD01059261	-8.83	7.8721
UCSD-0737460	O=C(N(CCC#N)CC1=CC=CO1)C1=CC=C(OCC2CC2)C=C1	DDD01069203	-10.8733	14.2358
UCSD-0819721	NC(=O)C(CNC(=O)COCC(F)(F)F)Cc1ccc(F)cc1	DDD01081007	-9.71	12.7239
UCSD-0723266	CCNC(=O)CN(CC)C(=O)CC1=CSC(=N1)C(C)C	DDD01073048	-12.08	8.6154
UCSD-0820785	CN(C)CCn1c2CCN(Cc3ccncc3)CCc2ccc1=O	DDD01082143	-11.2167	10.4892
UCSD-0785153	CS(=O)(=O)Nc1ccc(cc1)[C@H]1OCC(=O)N[C@@H]1CO	DDD01025304	-13.9833	10.736
UCSD-0812620	CCOc1cncc(n1)N1CCCC1c1nnc2CCCCCn12	DDD01072878	-9.91667	6.89136
UCSD-0839477	COc1cccc(OCC2CCCN(C2)C(C)=O)c1	DDD01270233	-8.65667	6.01004
UCSD-0826956	Cn1ncc2C(CC(=O)Nc12)c1cc2OCOc2cc1Cl	DDD01246152	-18.6267	27.6935
UCSD-0821381	C(N1CCC2(CC(C2)Oc2cccnc2)CC1)c1ccccn1	DDD01082749	-23.24	33.4408
UCSD-0837919	CC(C)c1nc(CN(C)Cc2ccc(F)cc2)cs1	DDD01257156	-9.2	6.06218
UCSD-0796126	Cc1csc(CN2CC[C@H]3C[C@@H](O[C@@H]3C2)c2nnc(C)[nH]2)n1	DDD01036959	-8.26667	5.26245
UCSD-0798825	Cc1noc(C)c1-c1cc(CCC2CN(CCO2)C(=O)CN)ncn1	DDD01057388	-9.89333	12.233
UCSD-0716267	CC(C)C1=NN(C)C(N2CCOCC2)=C1CNCC(=O)N(C)C	DDD01302678	-15.9033	12.9288
UCSD-0785470	CC(O)Cc1cc2c(C)cc(O)cc2c(=O)o1	DDD01025621	-10.31	7.84648
UCSD-0801829	CN(Cc1ccc(F)cc1)CC1(O)CCN(C1)C(=O)c1ccccn1	DDD01060394	-14.51	12.65
UCSD-0785466	O[C@H]1[C@@H](Oc2cc(O)cc(O)c2C1=O)c1ccc(O)cc1	DDD01025617	-18.3433	20.4142
UCSD-0811929	CCn1cnnc1C1CCN(CC1)C(=O)c1ccnc(c1)N(C)C	DDD01072034	-17.4167	13.2318
UCSD-0793477	Cc1cccc(CN2CCc3ncnc(NC4CCC4)c3CC2)n1	DDD01033982	-10.12	9.11014
UCSD-0800306	Cc1c(Cl)cccc1NC(=O)c1nc[nH]n1	DDD01058870	-14.89	14.9495
UCSD-0786115	Clc1ccccc1-c1cnc2NCCC(=O)N(Cc2c1)C1CC1	DDD01026302	-13.7533	16.0543
UCSD-0801180	CN1CCCC(C1)c1ccnc(c1)C(=O)NC1CC1	DDD01059745	-15.6967	12.8473
UCSD-0798503	O=C(NCc1ccnc(n1)C1CCCOC1)c1cccs1	DDD01057066	-18.29	26.6889
UCSD-0820721	CN1CCN(CC1)C1COC2(C1)CCN(CC2)c1ccc(cc1)C#N	DDD01082077	-23.9667	29.9941
UCSD-0821419	O=C(N1C[C@@H]2CCN(C[C@@H]2C1)c1cnccn1)c1cnccn1	DDD01082787	-32.4733	32.5014
UCSD-0839187	Cn1cc(cn1)-c1cc(C(F)F)n2nc(CCC(O)=O)nc2n1	DDD01259440	-10.6433	7.31598
UCSD-0823954	C(Oc1ncccn1)c1nnc2CN(CC3CC3)CCn12	DDD01085338	-7.57333	4.65075
UCSD-0830408	Cc1c(CN2CCc3[nH]cnc3C2C(O)=O)[nH]c2ccc(F)cc12	DDD01249610	-7.32333	4.29349
UCSD-0811404	COc1ncccc1C(=O)NC1(CCOCC1)c1cccc(F)c1	DDD01071416	-21.9333	26.8105
UCSD-0789745	CCS(=O)(=O)N1CCCC2(CCCN2Cc2cccc(Cl)c2)C1	DDD01030249	-13.8667	9.93042
UCSD-0794017	CN(Cc1cn2CCN(Cc2n1)C(=O)C1CCCO1)Cc1ccco1	DDD01034522	-11.6567	10.3934
UCSD-0794109	CCS(=O)(=O)N1C[C@@H](Oc2ccccn2)[C@H]2OCCC[C@@H]12	DDD01034614	-11.0667	8.70019
UCSD-0786093	CCNC(=O)N1CCC(OC)c2ccccc2N(CC(=O)NC)C(=O)C1	DDD01026280	-20.9067	19.1734
UCSD-0820640	Fc1cccc(CN2CCC22CCCN(C2)C(=O)c2ccccc2)c1	DDD01081996	-19.14	26.0862
UCSD-0823272	C(N1CCCn2c(Cn3cccn3)nnc2C1)c1ccsc1	DDD01084651	-27.3833	35.1613
UCSD-0795198	COC(=O)Cn1n2C(=O)N(Cc2nc1=O)c1ccc(Cl)cc1	DDD01035975	-11.02	7.792
UCSD-0837702	CC(C)[C@@H]1CN(C[C@H]1NC(C)=O)C(=O)c1csc(n1)C(C)C	DDD01256939	-11.89	9.67431
UCSD-0794190	Cc1noc(n1)[C@@H]1C[C@@H]2CCN(CC3CC3)C[C@H]2O1	DDD01034695	-12.2967	16.3751
UCSD-0839493	Cc1nc(O)c2nnn(C[C@H]3CCCN3C(=O)C(C)(C)C)c2n1	DDD01270249	-7.93	4.74317
UCSD-0798894	Cc1nn(C)cc1-c1cc(n[nH]1)C(=O)NCC(C)(C)c1cccc(F)c1	DDD01057457	-17.71	16.8874
UCSD-0800497	Cc1cnc(cn1)-c1nc(O)c2CCN(Cc2n1)C(=O)C1CCCC1	DDD01059062	-13.6933	16.0607
UCSD-0788128	O=C(CN1C(=O)CCC1=O)NCc1cc(C2CC2)n(n1)C1CCCC1	DDD01028632	-19.9933	24.4214
UCSD-0798141	CCC(C)NC(=O)c1cc(c(C)s1)S(=O)(=O)N1CCCC1	DDD01056704	-19.7133	29.5202
UCSD-0809224	CCCC(=O)N(C)c1cccc2ncccc12	DDD01068781	-10.1833	7.34444
UCSD-0814508	Cc1cc(c(C)s1)S(=O)(=O)Nc1onc(C)c1C	DDD01075024	-16.9167	13.5237
UCSD-0795362	Cc1cccc(CN2CCC3(CCN(C3)c3ccccn3)C2=O)c1	DDD01036195	-22.5167	26.8954
UCSD-0796272	O=C(N1CCOCC2(CCN(C2)C2CCOCC2)C1)c1cnccn1	DDD01037105	-14.65	11.5259
UCSD-0796344	Cc1nc(sc1C)[C@@H]1C[C@@H]2CCN(C[C@H]2O1)C(=O)c1ccnnc1	DDD01037177	-14.1533	10.1305
UCSD-0825305	Nc1ncc(C(=O)N2CCC(O)(CO)CC2)c(n1)-c1ccccc1	DDD01244499	-7.83	5.27
UCSD-0813401	COc1ccccc1C(NC(=O)NC1CC1)c1noc(C)n1	DDD01073776	-30.8867	32.6528
UCSD-0822312	CN(C)CCOCc1nnn2CCCN(Cc3ccc(C)s3)Cc12	DDD01083686	-22.01	32.5603
UCSD-0788939	O=C(CC1CC1)N1C[C@@H]2CCN(C[C@@H]2C1)c1cccnc1	DDD01029443	-7.45333	4.55985
UCSD-0822951	CCOCC1CN(Cc2ccc(F)cc2)Cc2nn(C)cc12	DDD01084329	-21.69	18.0362
UCSD-0785894	Nc1nc(Nc2ccccc2)cc(n1)N1CCNCC1	DDD01026081	-4.85333	2.00493
UCSD-0791235	CN(C)C(=O)[C@H]1C[C@H]2CN(C[C@@H]1O2)C(=O)NCc1ccccc1C	DDD01031739	-9.58667	7.99115
UCSD-0830823	COCCn1cnnc1Cn1ccnc1-c1ccccc1C	DDD01250027	-13.67	11.689
UCSD-0795370	COc1ccc(CN2CCC3(CCN(CC(C)C)C3=O)CC2)cc1	DDD01036203	-11.97	8.55977
UCSD-0823231	Cn1cc(CN2CCCC22CCN(CC2)C(=O)c2ccccn2)cn1	DDD01084609	-10.6167	11.6635
UCSD-0847086	O=C(CCc1cccs1)N1CCCCC1Cn1cccn1	DDD01304755	-10.1567	7.63252
UCSD-0838820	Fc1ccc(CN2CCCC3(CCN(C3)C3CCSCC3)C2=O)cc1F	DDD01258058	-3.66	1.18199
UCSD-0828873	Cc1nccn1CCN1C(=O)CC2(CCCC2)CC1=O	DDD01248075	-27.35	22.2164
UCSD-0838795	CCS(=O)(=O)N1CCC(CC1)c1nnc(Cn2cccn2)n1C1CC1	DDD01258033	-10.04	8.7429
UCSD-0785917	CC(C)CNC(=O)Cn1c(C)c(C)nc1-c1ccoc1	DDD01026104	-11.3567	7.9595
UCSD-0786119	O=C1CCNc2cc3OCOc3cc2CN1Cc1ccco1	DDD01026306	-24.6667	30.6644
UCSD-0821916	CC(C)CN1C[C@H]2CC[C@@]3(N=C(C)N(CC(C)C)C3=O)[C@H]2C1	DDD01083288	-13.15	14.9702
UCSD-0797938	CC(C)CC(=O)N1CCC(CC1)Nc1nc(O)cc(n1)-c1ccsc1	DDD01056501	-19.6	20.5672
UCSD-0830074	Cc1csc2c(ncnc12)N1CCNC(C1)C(=O)Nc1ccc(F)cc1	DDD01249276	-35.6367	35.473
UCSD-0829877	O=C(CCn1cnc2ccccc12)N1CCCC2(CNC(=O)O2)CC1	DDD01249079	-18.68	26.7824
UCSD-0792842	OC(=O)CN1CCC2(CCc3ccccc23)CC1	DDD01033347	-12.3667	12.1412
UCSD-0820788	Cc1noc(C)c1CN1CCn2cc(CN3CCCC3)nc2C1	DDD01082146	-31.48	34.8897
UCSD-0794091	CCC1=N[C@@]2(CC[C@@H]3CN(C[C@H]23)S(=O)(=O)CC)C(=O)N1CCOC	DDD01034596	-16.3467	14.0491
UCSD-0786192	CCOC(=O)CNC(=O)N1CCC(OC)c2ccccc2N(C)C(=O)C1	DDD01026379	-27.3767	39.8905
UCSD-0798122	Cc1nn(C)cc1NC(=O)CN1CCC(CC1)Oc1ccccc1C	DDD01056685	-15.66	14.9141
UCSD-0844581	CCOc1ccccc1-c1noc(CN2CCOC(CN(C)C)C2)n1	DDD01301516	-7.13	6.25635
UCSD-0787281	CCNC(=O)N1CCN(CC1)c1nc2ccccc2n1C	DDD01027785	-13.5633	9.98254
UCSD-0785018	Cn1ccnc1CN1C[C@H]2CN(CCN2C1=O)S(=O)(=O)c1ccccc1	DDD01025169	-8.36333	9.64464
UCSD-0795442	C[C@H]1[C@@H]2CN(CCc3ccccc3)C[C@@H]2CNC1=O	DDD01036275	-14.3733	14.4724
UCSD-0821764	O=C(NCc1ccccn1)[C@@H]1COC[C@H]2CN(C[C@@H]12)C1CCC1	DDD01083135	-25.0433	28.8128
UCSD-0800295	Cc1cc(nc(n1)C1CCCN1S(C)(=O)=O)-c1ccccc1C(O)=O	DDD01058859	-17.9433	17.8927
UCSD-0785911	CC(=O)N1N=C(OC1C(=O)NCc1ccc(C)o1)c1cccs1	DDD01026098	-7.39	3.99125
UCSD-0787708	Brc1ccc2OCC(=O)N(CC3CC3)Cc2c1	DDD01028212	-10.9167	7.02608
UCSD-0802134	COc1ccc(cc1)S(=O)(=O)N1CCC(O)(CN(C)C)C1	DDD01060699	-10.6733	10.4949
UCSD-0800880	COCC(=O)N1CCC(CC1)c1csc(NC(C)=O)n1	DDD01059445	-14.04	18.4199
UCSD-0826625	Cc1nc(N(CC2CCCO2)Cc2ccncc2)c2ccsc2n1	DDD01245820	-11.02	7.13717
UCSD-0796938	CCCN1CCC(CC1)NC(=O)c1csc(C)c1-c1ccc(C)cc1	DDD01037805	-11.32	7.35535
UCSD-0818883	CC(CNC(=O)N1CCN(CC(F)F)CC1)Cc1cccs1	DDD01080002	-5.39	2.43846
UCSD-0800288	OC1(CN2CCN(CC2)c2ccccc2)CCN(C1)C(=O)C1CC1	DDD01058852	-13.66	10.5669
UCSD-0839519	CC(C)N1CCCC(C1)c1nc(C)cc(n1)-c1ccc(cc1)C(O)=O	DDD01270275	-8.1	5.6466
UCSD-0786445	CC[C@H](C)[C@H](NC(=O)Cn1ccc2ccc(F)cc12)C(=O)OC	DDD01026737	-10.9667	7.3867
UCSD-0800706	CN(C)S(=O)(=O)N1CCCC(C1)c1ccncn1	DDD01059271	-8.65667	5.95942
UCSD-0844406	COc1c(C)cnc(CN(C)C(=O)c2ccccc2F)c1C	DDD01301294	-15.7733	11.3096
UCSD-0839521	Cc1c(CN2CCCC(C2)c2[nH]ncc2S(C)(=O)=O)cnn1C	DDD01270277	-10.7533	9.27263
UCSD-0791724	CC(C)CNC(=O)[C@H]1CCS(=O)(=O)[C@@H]2CN(Cc3cccnc3)C[C@H]12	DDD01032228	-5.11667	3.3547
UCSD-0822151	COCCNC(=O)C1CN(Cc2ccncc2)Cc2ccnn2C1	DDD01083525	-26.2133	30.2446
UCSD-0785831	COc1ccc2C(=O)CC3(CCN(Cc4ccc(C)cc4)CC3)Oc2c1	DDD01026018	-6.74	5.07063
UCSD-0800482	O=C(C1CCOC1)N1Cc2ccccc2OC2(CCOCC2)C1	DDD01059047	-14.4167	12.0073
UCSD-0832463	COc1ccc(cc1)N1CCN(CC1(C)C)C(=O)CCn1nnnc1C	DDD01251672	-20.3867	19.5963
UCSD-0786609	CC(C)C(=O)Nc1ccc(Oc2ccc3OCOc3c2)nc1	DDD01027112	-17.5867	19.4806
UCSD-0828247	CC(C)n1cc(cn1)C(=O)NCCc1cn2ccsc2n1	DDD01247447	-5.66667	2.49745
UCSD-0801812	Cn1ccnc1CN1CCCC(Cc2ccnc3ccncc23)CC1	DDD01060377	-11.7233	8.392
UCSD-0800111	CN1CCC(CC1)c1[nH]ncc1S(C)(=O)=O	DDD01058675	-13.8867	14.2426
UCSD-0819916	Cc1cc(C)n(n1)C1CCCN(C1)C(=O)c1cccc2[nH]ncc12	DDD01081261	-19.3633	17.7338
UCSD-0801818	Oc1cc(nc(n1)C1CCCN1C(=O)c1cccnc1)-c1ccccn1	DDD01060383	-13.8	13.6946
UCSD-0795375	CCOC1COC2(C1)CCN(Cc1ccc3OCOc3c1)CC2	DDD01036208	-10.43	8.70274
UCSD-0785335	O=C(C1CC1)N1CC[C@H]2NC(=O)N(C(=O)[C@@H]12)c1ccccc1	DDD01025486	-8.05	6.51422
UCSD-0823713	CC(C)CC(=O)N1CCc2nc(nc(NC(C)C)c2C1)N1CCOCC1	DDD01085095	-10.6333	7.01593
UCSD-0829898	CCCn1cc(C(=O)NCC(=O)NC2CC2)c(C)n1	DDD01249100	-13.8333	10.85
UCSD-0619665	C(C1CN(CC2=NC(=NO2)C2=NC=CC=C2)CCO1)N1C=CC=N1	DDD01303244	-10.93	10.3962
UCSD-0838961	COc1ccc(cc1O)C1CC(=O)Nc2c1nc1CCCCn21	DDD01258199	-12.6367	8.4028
UCSD-0834414	CC(=O)c1cn(CC(=O)N2CCCC(O)(CO)C2)c2ccccc12	DDD01253630	-10.97	6.89374
UCSD-0838964	CN(C)C(=O)CN1C[C@H]2CC[C@@H](C1)N(C2)C(=O)Cc1ccccc1Cl	DDD01258202	-23.8033	21.0495
UCSD-0824409	OC(=O)CCc1cn(nn1)C1CCN(CC1)c1ncccc1Cl	DDD01243602	-7.58667	4.02166
UCSD-0825961	O=C(CCc1cc2CN(CCCn3cccc3)CCn2n1)N1CCCC1	DDD01245156	-19.98	15.6155
UCSD-0821915	CCS(=O)(=O)N1C[C@H]2CC[C@@]3(N=C(C)N(CC(C)C)C3=O)[C@H]2C1	DDD01083287	-25.1467	29.9254
UCSD-0846254	NC(=O)CN1CCCN(CC1)C(=O)Cc1ccc(F)c(Br)c1	DDD01303706	-11.3833	10.735
UCSD-0795907	O=C(NCC1CC1)[C@@H]1CCO[C@@H]2CCN(Cc3ccco3)C[C@@H]12	DDD01036740	-14.6533	11.2839
UCSD-0785832	COc1ccc2C(=O)CC3(CCN(Cc4ccccc4C)CC3)Oc2c1	DDD01026019	-7.50333	5.90195
UCSD-0838746	CCC(=O)N1CC[C@H]([C@H](O)C1)c1ccc2ccccc2c1	DDD01257984	-18.99	15.395
UCSD-0822320	Cn1cccc1C(=O)NCc1cn2CCN(Cc3ccccn3)Cc2n1	DDD01083694	-36.3567	36.8782
UCSD-0800505	C(N1CCOCC1)c1nc(no1)-c1ccc(cc1)N1CCCCC1	DDD01059070	-25.26	28.423
UCSD-0830272	CCn1cc(C(=O)NCCN2CCCc3ccccc23)c(C)n1	DDD01249474	-11.6767	12.088
UCSD-0801006	CC(=O)N1CCC(CC1)c1cnc(cn1)-c1c(C)n[nH]c1C	DDD01059571	-14.4667	12.1665
UCSD-0799817	Cc1cc(O)cc(n1)C1CCCN1C(=O)c1ccncc1	DDD01058381	-12.04	11.6367
UCSD-0795610	O=C(N1CCc2ncc(Cn3cccn3)n2CC1)c1cccc(c1)C#N	DDD01036443	-19.9367	15.1246
UCSD-0819657	COc1cccc(c1)N1CCN(CCC(=O)NC2CCCC2)CC1	DDD01080929	-13.34	11.131
UCSD-0821379	CCc1cnc(nc1)N1CC2(C1)CCN(C2)S(=O)(=O)C1CC1	DDD01082747	-21.0433	16.1529
UCSD-0802966	CN1CC(=O)N(Cc2c(NC3CCC3)ncnc12)C1CCNCC1	DDD01061541	-23.6633	32.555
UCSD-0809501	CCc1n[nH]c(n1)C1CN(CCO1)C(=O)CCOCC(F)(F)F	DDD01069116	-11.45	13.562
UCSD-0587017	CS(=O)(=O)NCC1CCCCN1C(=O)NC1=C(N=CC=C1)N1CCCC1	DDD01080933	-12.8533	8.56508
UCSD-0828404	OCC1(O)CCCN(CC1)C(=O)Nc1ccc2occc2c1	DDD01247604	-29.6567	31.3025
UCSD-0813821	COc1ccnc(NCC2CN(CCO2)C2CC2)n1	DDD01074248	-8.94	5.57078
UCSD-0802795	CC(C)C1=NOC2(C1)CCN(CC2)C(C)=O	DDD01061370	-17.5867	23.9214
UCSD-0784895	COc1ccc(CN2CCOC[C@@H](C2)OCCC(C)C)cc1	DDD01025046	-7.16333	3.44277
UCSD-0824140	C[C@H]1CCCCN1CCCNc1nccc(n1)-c1c[nH][nH]c1=O	DDD01235859	-5.33667	2.90159
UCSD-0821534	CN1CCN(CC1)c1ncnc2CCN(CCc12)S(=O)(=O)C1CC1	DDD01082904	-28.4367	24.9016
UCSD-0814170	CCc1[nH]n(C)c(=N)c1-c1ccc2OCOc2c1	DDD01074639	-11.6667	11.5233
UCSD-0809717	CCc1ccc(o1)C1COCCN1C(=O)Nc1ccc(C(N)=O)c(Cl)c1	DDD01069372	-16.6833	13.8416
UCSD-0795105	CSCC(C)(O)CNC(=O)c1cc(Br)ccc1Cl	DDD01035870	-18.84	23.8529
UCSD-0825987	CN(C)C(CNc1ncnc2CNCCc12)c1ccccc1C	DDD01245182	-10.22	6.92035
UCSD-0796128	C(N1CCc2ncnc(C3CC3)c2CC1)c1ccoc1	DDD01036961	-5.56667	2.54952
UCSD-0794008	Cn1cccc1C(=O)N1C[C@@H]2COC[C@]2(CNS(C)(=O)=O)C1	DDD01034513	-10.3933	9.36227
UCSD-0827712	CN(C)c1nc2CCN(CCc2c(n1)N1CCCC1)C(=O)c1ccc[nH]1	DDD01246910	-4.49	1.18528
UCSD-0827790	COc1cccc(c1)N1CCN(CC1=O)C(=O)CO	DDD01246988	-12.3	8.28191
UCSD-0786098	OCC1N(Cc2ccc(F)cc2)C2CCC1(O)CC2	DDD01026285	-19.0467	27.1529
UCSD-0847324	CN(CC1CN(Cc2csc(C)n2)CCO1)c1cccnn1	DDD01305049	-14.5533	10.1927
UCSD-0786097	OCC1N(Cc2ccco2)C2CCC1(O)CC2	DDD01026284	-18.19	15.4494
[truncated: 1,643 more rows]
